# Supplementary material for: Comprehensive genomic resources related to domestication and crop improvement traits in Lima bean
Source: Nat Commun. 2021 Jan 29;12:702. doi: 10.1038/s41467-021-20921-1 (PMC7846787; doi:10.1038/s41467-021-20921-1)
Supplement: Supplementary file 5 — Supplementary Data 1 [file 41467_2021_20921_MOESM5_ESM.xlsx]

## Sheet: Hoja1
Gene	GeneID v1.0 P. vulgaris	Chromosome	Gene Start	Gene End	Gene ID P. lunatus	Chromosome	Start	End	Trait	Reported in organism	Comment	Reference
ALC	Phvul.001G023200	1	2035684	2039406	Pl01G0000026100.v1	Pl01	2015530	2019041	Pod shattering	Common bean	Pod shattering pathway
MYB56	Phvul.001G064600	1	8116183	8118029	Pl01G0000079800.v1	Pl01	7737015	7738854	Flowering time	Common bean	regulates negatively flowering time	Moghaddam et al., 2016
KNUCKELS (KNU)	Phvul.001G087900	1	15832868	15833398	Pl01G0000114500.v1	Pl01	12152524	12153036	Determinate growth habit	Common bean	promotes determinate development	Moghaddam et al., 2016
BRG-1	Phvul.001G094300	1	20327733	20330144	Pl01G0000140900.v1	Pl01	15827691	15830156	Flowering time	Common bean	regulates the photoperiod and vernalization pathway by directly interacting and suppressing a flowering-time suppressor	Moghaddam et al., 2016
fin, PvTFL1	Phvul.001G189200	1	45561512	45563326	Pl01G0000340500.v1	Pl01	40953468	40954638	Flowering time	Common bean	the terminal shoot meristem switches from a vegetative to reproductive state, resulting in a terminal inflorescence. This leads to shorter flowering period, earlier maturation and ease of mechanized harvest.	Campa et al., 2018; Repinski et al., 2012
LWD1	Phvul.001G192200	1	45805874	45808752	Pl01G0000343500.v1	Pl01	41227109	41228307	Flowering time	Common bean	changes the expression periodicity of genes in the circadian rythm pathway leading to earlier flowering	Moghaddam et al., 2016
SPINDLY	Phvul.001G192300	1	45815189	45837312	Pl01G0000343700.v1	Pl01	41234294	41261155	Flowering time	Common bean	delays flowering by suppressing gibberellic acid pathway and directly interacts with GIGANTEA, a gene within the photoperiod pathway	Moghaddam et al., 2016
Raffinose	Phvul.001G214300	1	47752802	47756576	Pl01G0000366100.v1	Pl01	43124090	43128122	Raffinose content	Common bean	Antinutritional component accounting for flatulence	McPhee et al., 2002
ACC Synthase (ACS6)	Phvul.002G293000	2	45641803	45644641	Pl02G0000428600.v1	Pl02	48424998	48428120	Ethylene biosynthesis	Mung bean	Ethylene is a major phytohormone that regulates several physiological processes during plant growth and development	Song et al., 2005
PDH1	Phvul.003G252100	3	47990171	47991011	Pl03G0000340600.v1	Pl03	40268335	40269441	Pod shattering	Common bean	dirigent-type gene involved in the polymerization of lignin monomers	Parker et al. 2020
ATMY B118	Phvul.004G011400	4	1126270	1128453	Pl04G0000011400.v1	Pl04	909826	913860	Days to maturity	Common bean	regulates seed maturation	Moghaddam et al., 2016
ABCB19	Phvul.004G027800	4	2917932	2929066	Pl04G0000029100.v1	Pl04	2540478	2551683	Plant architecture	Common bean	ABC transporter protein that affects factors associated with plant architecture	Moghaddam et al., 2016
DREB1A	Phvul.004G122000	4	39326716	39327951	Pl04G0000312600.v1	Pl04	43610337	43611011	Drought tolerance	Common bean	Dehydration responsive element-binding gene. Related to drought, salt and cold tolerance in different crops: common bean, rice, peanut, wheat, soybean, sugarcane	Konzen et al., 2019
ASN1	Phvul.006G069300	6	18819790	18824196	Pl06G0000180000.v1	Pl06	23235483	23240293	Seed weight	Common bean	overexpression of ASN1 leads to higher N and seed soluble protein content, and increased seed weight	Moghaddam et al., 2016
100 seed weight	Phvul.006G075400	6	19457795	19460226	Pl06G0000187600.v1	Pl06	23977173	23979091	100 seed weight	Common bean	Gene associated to yield. Results from association studies in common bean (CIAT)	Johnson et al. 2002
100 seed weight	Phvul.006G075500	6	19463658	19466541	Pl06G0000187700.v1	Pl06	23981615	23984678	100 seed weight	Common bean	Gene associated to yield. Results from association studies in common bean (CIAT)	Johnson et al. 2002
AHAS	Phvul.006G187400	6	29575027	29577339	Pl06G0000308200.v1	Pl06	34119282	34121228	Herbicide resistance	Chickpea	Herbicide resistance in different crops: Maize, rice, wheat, sunflower, oilseed rape, lentil, soybean, barley	Thompson & Tar’an 2014
SAC51	Phvul.006G203400	6	30710251	30713858	Pl06G0000325100.v1	Pl06	35278329	35279950	Plant architecture	Common bean	controls stem elongation	Moghaddam et al., 2016
P Locus	Phvul.007G171300	7	40383553	40387926	Pl07G0000312000.v1	Pl07	39093568	39106935	Seed coat color	Common bean	Gene associated to seed color.	Johnson et al. 2002, Moghaddam et al., 2016
SWINGER	Phvul.007G213900	7	45288733	45299933	Pl07G0000258000.v1	Pl07	33045591	33059819	Flowering time	Common bean	Component of the polycomp repressive complex 2 that promotes flowering	Moghaddam et al., 2016
SAR1	Phvul.007G218900	7	45812355	45838390	Pl07G0000337800.v1	Pl07	41584450	41610988	Plant architecture	Common bean	appears to control stem thickness	Moghaddam et al., 2016
Invertase-pectin methylesterase inhibitor	Phvul.007G246700	7	48628860	48631054	Pl07G0000250500.v1	Pl07	32118364	32120437	Plant architecture	Common bean	favors an upright, nonlodged architecture	Moghaddam et al., 2016
SBT1.1	Phvul.008G013300	8	1168398	1171851	Pl08G0000015800.v1	Pl08	1305046	1307894	Seed weight	Common bean	provides developmental signals or regulates metabolic flux to control embryo growth, regulating seed size	Moghaddam et al., 2016
AMY1	Phvul.010G017600	10	2778387	2780941	Pl10G0000050200.v1	Pl10	5457197	5460169	Seed weight	Common bean	affects metabolic efflux and protein storage in seed	Moghaddam et al., 2016
CenH3	Phvul.010G112000	10	37617013	37621872	Pl10G0000302500.v1	Pl10	48619465	48624328	Centromere function	Banana, barley, wheat	Manipulation of this gene could induce haploids	Britt & Kuppu, 2016; Muiruri et al., 2017; Sanei et al., 2011; Yuan et al., 2015
TOR	Phvul.011G050300	11	4300671	4317219	Pl11G0000057300.v1	Pl11	4196720	4212106	Days to maturity	Common bean	controls senescence and nutrient recycling. Enhanced TOR expression increases organ and cell size and seed production	Moghaddam et al., 2016
VRN1	Phvul.011G050800	11	4351357	4353334	Pl11G0000057900.v1	Pl11	4250053	4251883	Flowering time	Common bean	early flowering without vernalization	Moghaddam et al., 2016
FPA	Phvul.011G053300	11	4526035	4532862	Pl11G0000060700.v1	Pl11	4433956	4440908	Flowering time	Common bean	overexpression of FPA results in earlier flowering in short days and insensitivity to photoperiod	Moghaddam et al., 2016
SHL	Phvul.011G158300	11	41689184	41693660	Pl11G0000335200.v1	Pl11	41444832	41446940	Flowering time	Common bean	early flowering and senescence	Moghaddam et al., 2016
SPL4	Phvul.011G164800	11	43283587	43284947	Pl11G0000342900.v1	Pl11	42499111	42500418	Plant architecture	Common bean	Cause architectural changes such as lodging, internode length, branching and biomass. It also has a pleiotropic effect on shoot branching, plant height and floral induction	Moghaddam et al., 2016
References
Campa A, Murube E, Ferreira JJ. (2018). Genetic Diversity, Population Structure, and Linkage Disequilibrium in a Spanish Common Bean Diversity Panel Revealed through Genotyping-by-Sequencing. Genes (Basel): 9, 518.
Johnson WC, and Gepts P. (2002). The role of epistasis in controlling seed yield and other agronomic traits in an Andean×Mesoamerican cross of common bean (Phaseolus vulgaris L.). Euphytica 125, 69–79.
Konzen ER, et al. (2019). DREB Genes from Common Bean (Phaseolus vulgaris L.) Show Broad to Specific Abiotic Stress Responses and Distinct Levels of Nucleotide Diversity. Int J Genomics: 9520642.
Mcphee K, Zemetra R, Brown J and Myers JR. (2002). Genetic Analysis of the Raffinose Family Oligosaccharides in Common Bean.” Journal of the American Society for Horticultural Science 127: 376-382
Moghaddam SM, et al. (2016). Genome-Wide Association Study Identifies Candidate Loci Underlying Agronomic Traits in a Middle American Diversity Panel of Common Bean. The Plant Genome 9, plantgenome2016.2002.0012.
Parker TA, Berny Mier y Teran JC, Palkovic A, Jernstedt J, Gepts P (2020). Pod indehiscence is a domestication and aridity resilience trait in common bean. New Phytologist 225:558-570
Repinski SL, Kwak M, Gepts P. (2012). The common bean growth habit gene PvTFL1y is a functional homolog of Arabidopsis TFL1. Theoretical and Applied Genetics 124: 1539-1547.
Song JD, Kim JH, Lee DH, Rhew TH, Cho SH, Lee CH. (2005). Developmental regulation of the expression of 1-aminocyclopropane-l-carboxylic acid (ACC) synthase and ACC oxidase genes in hypocotyls of etiolated mung bean seedlings. Plant Science 168:1149–1155
Thompson C, Tar’an B. (2014). Genetic characterization of the acetohydroxyacid synthase (AHAS) gene responsible for resistance to imidazolinone in chickpea (Cicer arietinum L.). Theoretical and Applied Genetics 127, 1583-1591.
