# Supplementary material for: Comprehensive genomic resources related to domestication and crop improvement traits in Lima bean
Source: Nat Commun. 2021 Jan 29;12:702. doi: 10.1038/s41467-021-20921-1 (PMC7846787; doi:10.1038/s41467-021-20921-1)
Supplement: Supplementary file 6 — Supplementary Data 2 [file 41467_2021_20921_MOESM6_ESM.xlsx]

## Sheet: R_genes
Location				Domains								Orthologs P. vulgaris
Gene ID	Chromosome	Start	End	CC	TIR	NB-ARC	LRR	WRKY	Leucine zipper	Protein kinases	Synteny ortholog v1.0	All orthologs v1.0	Reported
Pl01G0000000900.v1	Pl01	63983	66008							x	Phvul.001G000500	Phvul.001G000500
Pl01G0000001300.v1	Pl01	95808	97469							x	Phvul.001G000900	Phvul.001G000900
Pl01G0000006600.v1	Pl01	458625	462153	x							Phvul.001G005600	Phvul.001G005600, Phvul.003G026300
Pl01G0000014900.v1	Pl01	1110903	1115711				x				Phvul.001G014400
Pl01G0000017400.v1	Pl01	1282671	1285246	x							Phvul.001G016400
Pl01G0000019000.v1	Pl01	1383962	1386924				x				Phvul.001G017300	Phvul.001G017300
Pl01G0000019700.v1	Pl01	1461513	1471616							x	Phvul.001G018000	Phvul.001G018000	Richard et al. 2018
Pl01G0000020300.v1	Pl01	1536806	1540335			x					Phvul.001G018800	Phvul.001G018800	Meziadi et al. 2016; Richard et al. 2018
Pl01G0000020400.v1	Pl01	1541674	1545338			x					Phvul.001G018900	Phvul.001G018900	Meziadi et al. 2016
Pl01G0000024400.v1	Pl01	1856217	1863420							x	Phvul.001G022300	Phvul.001G022300
Pl01G0000027600.v1	Pl01	2186322	2187605				x				Phvul.001G024400	Phvul.001G024400
Pl01G0000027900.v1	Pl01	2227754	2229400				x				Phvul.001G024700	Phvul.001G024700
Pl01G0000036100.v1	Pl01	3061904	3065304						x
Pl01G0000040200.v1	Pl01	3397336	3398520							x	Phvul.001G035100	Phvul.001G035100
Pl01G0000040300.v1	Pl01	3402543	3407936							x	Phvul.001G035100	Phvul.001G035100
Pl01G0000043800.v1	Pl01	3749456	3758549				x				Phvul.001G038400	Phvul.001G038400	Schmutz et al. 2014
Pl01G0000044100.v1	Pl01	3777149	3787721				x				Phvul.001G038700	Phvul.001G038700
Pl01G0000045400.v1	Pl01	3921893	3925807							x	Phvul.001G039300	Phvul.001G039300
Pl01G0000045900.v1	Pl01	4000816	4003478					x			Phvul.001G039900	Phvul.001G039900
Pl01G0000046100.v1	Pl01	4010691	4013063							x	Phvul.001G040000	Phvul.001G040000, Phvul.001G040300, Phvul.001G040500
Pl01G0000046200.v1	Pl01	4025443	4027353							x	Phvul.001G040400	Phvul.001G040100, Phvul.001G040400
Pl01G0000046400.v1	Pl01	4042549	4044920							x	Phvul.001G040500	Phvul.001G040000, Phvul.001G040300, Phvul.001G040500
Pl01G0000046500.v1	Pl01	4053422	4055276							x	Phvul.001G040600	Phvul.001G040600
Pl01G0000046600.v1	Pl01	4057457	4061478							x	Phvul.001G040700	Phvul.001G040700
Pl01G0000047000.v1	Pl01	4072253	4072864							x	Phvul.001G040800	Phvul.001G040800
Pl01G0000048600.v1	Pl01	4242378	4245043					x			Phvul.001G042100	Phvul.001G042100
Pl01G0000048800.v1	Pl01	4257996	4259822					x			Phvul.001G042200	Phvul.001G042200
Pl01G0000049500.v1	Pl01	4369903	4370430				x				Phvul.001G043000	Phvul.001G043000
Pl01G0000049600.v1	Pl01	4371500	4372434				x				Phvul.001G043000	Phvul.001G042800, Phvul.001G042900, Phvul.001G043000
Pl01G0000049700.v1	Pl01	4382522	4385131				x				Phvul.001G043000	Phvul.001G042800, Phvul.001G043000
Pl01G0000049800.v1	Pl01	4401215	4405532				x				Phvul.001G043000	Phvul.001G043000
Pl01G0000052200.v1	Pl01	4685295	4688208							x	Phvul.001G044900	Phvul.001G044900
Pl01G0000052400.v1	Pl01	4705996	4710915							x	Phvul.001G045100	Phvul.001G045100
Pl01G0000052900.v1	Pl01	4762862	4765530							x	Phvul.001G045400	Phvul.001G045400
Pl01G0000055500.v1	Pl01	5062618	5069121							x	Phvul.001G047100	Phvul.001G047100
Pl01G0000056400.v1	Pl01	5145878	5160039							x	Phvul.001G048200	Phvul.001G048000, Phvul.001G048200, Phvul.001G048400, Phvul.001G048500, Phvul.001G048600, Phvul.001G048700, Phvul.001G049000, Phvul.001G049200
Pl01G0000057000.v1	Pl01	5175011	5175961							x	Phvul.001G048500	Phvul.001G048000, Phvul.001G048200, Phvul.001G048400, Phvul.001G048500, Phvul.001G048600, Phvul.001G048700, Phvul.001G049000, Phvul.001G049200
Pl01G0000057300.v1	Pl01	5202146	5218126							x	Phvul.001G048600	Phvul.001G048000, Phvul.001G048200, Phvul.001G048400, Phvul.001G048500, Phvul.001G048600, Phvul.001G048700, Phvul.001G049000, Phvul.001G049200
Pl01G0000057400.v1	Pl01	5231495	5232016							x	Phvul.001G048700	Phvul.001G048000, Phvul.001G048200, Phvul.001G048400, Phvul.001G048500, Phvul.001G048700, Phvul.001G049000, Phvul.001G049200
Pl01G0000057600.v1	Pl01	5239877	5240812							x	Phvul.001G049000	Phvul.001G048000, Phvul.001G048200, Phvul.001G048400, Phvul.001G048500, Phvul.001G048700, Phvul.001G049000, Phvul.001G049200
Pl01G0000057800.v1	Pl01	5258123	5259058							x	Phvul.001G049200	Phvul.001G048000, Phvul.001G048200, Phvul.001G048400, Phvul.001G048500, Phvul.001G048700, Phvul.001G049000, Phvul.001G049200
Pl01G0000060200.v1	Pl01	5502457	5504895							x	Phvul.001G051100	Phvul.001G051100
Pl01G0000060400.v1	Pl01	5537443	5539881							x	Phvul.001G051100	Phvul.001G051100
Pl01G0000060600.v1	Pl01	5568954	5571709				x				Phvul.001G051300	Phvul.001G051300
Pl01G0000074600.v1	Pl01	7112920	7118693							x	Phvul.001G060600	Phvul.001G060600
Pl01G0000080400.v1	Pl01	7816281	7819171				x				Phvul.001G065400	Phvul.001G065400
Pl01G0000083700.v1	Pl01	8249678	8253185							x	Phvul.001G067700	Phvul.001G067700
Pl01G0000085900.v1	Pl01	8486133	8488467							x	Phvul.001G068500	Phvul.001G068500, Phvul.001G069600, Phvul.001G070000
Pl01G0000086200.v1	Pl01	8500137	8501156							x	Phvul.001G069200	Phvul.001G068800, Phvul.001G069200, Phvul.001G069500, Phvul.001G069800, Phvul.001G069900, Phvul.001G070200
Pl01G0000086300.v1	Pl01	8513825	8515753							x	Phvul.001G069600,	Phvul.001G068500, Phvul.001G069600, Phvul.001G070000
Pl01G0000086600.v1	Pl01	8537065	8538048							x	Phvul.001G069900	Phvul.001G068800, Phvul.001G069200, Phvul.001G069500, Phvul.001G069800, Phvul.001G069900, Phvul.001G070200
Pl01G0000086700.v1	Pl01	8541986	8543649							x	Phvul.001G070000	Phvul.001G068500, Phvul.001G069600, Phvul.001G070000
Pl01G0000087200.v1	Pl01	8568264	8569181							x	Phvul.001G070200	Phvul.001G068800, Phvul.001G069200, Phvul.001G069500, Phvul.001G069800, Phvul.001G069900, Phvul.001G070200
Pl01G0000087400.v1	Pl01	8606344	8607325							x	Phvul.001G070200	Phvul.001G068800, Phvul.001G069200, Phvul.001G069500, Phvul.001G069800, Phvul.001G069900, Phvul.001G070200
Pl01G0000087900.v1	Pl01	8662710	8666182				x
Pl01G0000088000.v1	Pl01	8667530	8669087				x
Pl01G0000089100.v1	Pl01	8813757	8816265							x	Phvul.001G071100	Phvul.001G071100
Pl01G0000089200.v1	Pl01	8819980	8821215							x	Phvul.001G071200	Phvul.001G071200
Pl01G0000089300.v1	Pl01	8828307	8830673							x	Phvul.001G071300	Phvul.001G071300
Pl01G0000089400.v1	Pl01	8836700	8839051							x	Phvul.001G071400	Phvul.001G071400
Pl01G0000096700.v1	Pl01	9840838	9845205							x	Phvul.001G075500	Phvul.001G075500
Pl01G0000096800.v1	Pl01	9843923	9847218							x	Phvul.001G075600	Phvul.001G075600
Pl01G0000096900.v1	Pl01	9858337	9865847							x	Phvul.001G075800	Phvul.001G075800
Pl01G0000097700.v1	Pl01	9926104	9930918							x	Phvul.001G076100	Phvul.001G076100
Pl01G0000097800.v1	Pl01	9938741	9940608							x	Phvul.001G076200	Phvul.001G076200
Pl01G0000097900.v1	Pl01	9960282	9967386							x	Phvul.001G076300	Phvul.001G076300
Pl01G0000098000.v1	Pl01	9971498	9971964							x
Pl01G0000100900.v1	Pl01	10328183	10337109						x		Phvul.001G077200	Phvul.001G077200, Phvul.003G259000, Phvul.006G148800, Phvul.011G102400
Pl01G0000106000.v1	Pl01	11117654	11119526							x	Phvul.001G083100	Phvul.001G083100
Pl01G0000106500.v1	Pl01	11201590	11205187				x				Phvul.001G083300	Phvul.001G083300
Pl01G0000111400.v1	Pl01	11856350	11859826				x				Phvul.001G087000	Phvul.001G087000
Pl01G0000115100.v1	Pl01	12264724	12266948					x			Phvul.001G088200	Phvul.001G088200
Pl01G0000122500.v1	Pl01	13307741	13312715							x	Phvul.001G090800	Phvul.001G090800
Pl01G0000138800.v1	Pl01	15447735	15450402			x	x				Phvul.001G093900	Phvul.001G093900	Meziadi et al. 2016; Richard et al. 2018
Pl01G0000150600.v1	Pl01	17206096	17218700							x	Phvul.001G096600	Phvul.001G096600 , Phvul.004G004800
Pl01G0000232400.v1	Pl01	28616286	28622244							x	Phvul.001G115100	Phvul.001G115100
Pl01G0000258800.v1	Pl01	32325852	32331161						x		Phvul.001G123300	Phvul.001G123300
Pl01G0000266700.v1	Pl01	33200035	33208989		x	x	x				Phvul.001G128200	Phvul.001G128200	Meziadi et al. 2016; Richard et al. 2018
Pl01G0000269700.v1	Pl01	33607183	33609706							x	Phvul.001G130800	Phvul.001G130800
Pl01G0000269900.v1	Pl01	33618734	33621253							x	Phvul.001G130800	Phvul.001G130800
Pl01G0000270100.v1	Pl01	33630288	33632827							x	Phvul.001G130800	Phvul.001G130800
Pl01G0000270300.v1	Pl01	33666291	33668816							x	Phvul.001G130800	Phvul.001G130800
Pl01G0000272900.v1	Pl01	34013035	34015834			x	x				Phvul.001G132300	Phvul.001G132300, Phvul.001G132500, Phvul.001G132600, Phvul.001G132700, Phvul.001G133100	Meziadi et al. 2016; Richard et al. 2018
Pl01G0000273000.v1	Pl01	34017997	34020914			x	x				Phvul.001G132800	Phvul.001G132800	Meziadi et al. 2016; Richard et al. 2018
Pl01G0000273100.v1	Pl01	34029341	34031493			x					Phvul.001G133000	Phvul.001G133000	Meziadi et al. 2016; Richard et al. 2018
Pl01G0000273200.v1	Pl01	34045368	34047890				x
Pl01G0000273500.v1	Pl01	34104470	34106680			x	x				Phvul.001G133400	Phvul.001G133400, Phvul.001G133600, Phvul.001G134300, Phvul.001G134400, Phvul.001G134500
Pl01G0000273800.v1	Pl01	34126444	34127449				x
Pl01G0000273900.v1	Pl01	34132843	34133205			x					Phvul.001G133400	Phvul.001G133400, Phvul.001G133600, Phvul.001G134300, Phvul.001G134400, Phvul.001G134500	Meziadi et al. 2016
Pl01G0000274000.v1	Pl01	34133374	34134174			x					Phvul.001G133600	Phvul.001G133400, Phvul.001G133600, Phvul.001G134300, Phvul.001G134400, Phvul.001G134500
Pl01G0000274100.v1	Pl01	34161876	34165028			x	x				Phvul.001G133600	Phvul.001G133400, Phvul.001G133600, Phvul.001G134300, Phvul.001G134400, Phvul.001G134500
Pl01G0000274200.v1	Pl01	34175933	34178521			x	x				Phvul.001G133600	Phvul.001G133400, Phvul.001G133600, Phvul.001G134300, Phvul.001G134400, Phvul.001G134500	Meziadi et al. 2016; Richard et al. 2018
Pl01G0000274300.v1	Pl01	34195043	34197615			x	x				Phvul.001G133600	Phvul.001G133400, Phvul.001G133600, Phvul.001G134300, Phvul.001G134400, Phvul.001G134500	Meziadi et al. 2016
Pl01G0000274500.v1	Pl01	34212401	34214971			x	x				Phvul.001G134000	Phvul.001G134000	Meziadi et al. 2016; Richard et al. 2018
Pl01G0000274600.v1	Pl01	34222038	34224672			x					Phvul.001G134100	Phvul.001G134100	Meziadi et al. 2016; Richard et al. 2018
Pl01G0000274700.v1	Pl01	34228206	34230806			x	x				Phvul.001G134300	Phvul.001G133400, Phvul.001G133600, Phvul.001G134300, Phvul.001G134400, Phvul.001G134500
Pl01G0000274900.v1	Pl01	34241484	34242609			x
Pl01G0000275200.v1	Pl01	34269515	34272100			x	x				Phvul.001G134400	Phvul.001G133400, Phvul.001G133600, Phvul.001G134300, Phvul.001G134400, Phvul.001G134500
Pl01G0000275500.v1	Pl01	34286960	34287779				x
Pl01G0000275900.v1	Pl01	34312971	34315948			x	x				Phvul.001G134500	Phvul.001G133400, Phvul.001G133600, Phvul.001G134300, Phvul.001G134400, Phvul.001G134500
Pl01G0000276100.v1	Pl01	34334678	34338280				x				Phvul.001G134600	Phvul.001G134600
Pl01G0000279400.v1	Pl01	34695558	34699967				x				Phvul.001G137300	Phvul.001G137300
Pl01G0000280500.v1	Pl01	34826013	34829333				x				Phvul.001G138500	Phvul.001G138500
Pl01G0000281800.v1	Pl01	34929699	34930697				x				Phvul.001G140000	Phvul.001G140000
Pl01G0000281900.v1	Pl01	34941597	34948828						x		Phvul.001G140100	Phvul.001G140100
Pl01G0000282900.v1	Pl01	35045373	35050637				x				Phvul.001G140900	Phvul.001G140900
Pl01G0000285700.v1	Pl01	35353869	35354921						x		Phvul.001G143500	Phvul.001G143500
Pl01G0000286600.v1	Pl01	35420433	35422626							x	Phvul.001G144200	Phvul.001G144200
Pl01G0000288700.v1	Pl01	35723243	35725692				x				Phvul.001G146600	Phvul.001G146600
Pl01G0000288900.v1	Pl01	35746428	35748672							x	Phvul.001G146800	Phvul.001G146800	Schmutz et al. 2014
Pl01G0000289000.v1	Pl01	35755236	35758026							x	Phvul.001G146900	Phvul.001G146900
Pl01G0000289100.v1	Pl01	35768825	35771103							x	Phvul.001G147000	Phvul.001G147000
Pl01G0000295800.v1	Pl01	36411139	36417833				x				Phvul.001G152400	Phvul.001G152400	Schmutz et al. 2014
Pl01G0000297900.v1	Pl01	36654604	36661146							x	Phvul.001G154300	Phvul.001G154300
Pl01G0000301100.v1	Pl01	36971620	36976385				x				Phvul.001G156800	Phvul.001G156800
Pl01G0000308700.v1	Pl01	37814262	37818928							x	Phvul.001G162200	Phvul.001G162200, Phvul.007G191400	Schmutz et al. 2014
Pl01G0000310300.v1	Pl01	37966385	37970321				x				Phvul.001G163700	Phvul.001G163700
Pl01G0000310400.v1	Pl01	37980210	37984159				x				Phvul.001G163800	Phvul.001G163800
Pl01G0000311700.v1	Pl01	38070738	38074020				x				Phvul.001G165100	Phvul.001G165100
Pl01G0000314900.v1	Pl01	38383881	38390898							x	Phvul.001G167700	Phvul.001G167700
Pl01G0000315600.v1	Pl01	38501985	38513960				x				Phvul.001G168300	Phvul.001G168300
Pl01G0000321400.v1	Pl01	39075420	39079304							x	Phvul.001G173600	Phvul.001G173600
Pl01G0000321500.v1	Pl01	39081376	39084647					x			Phvul.001G173700	Phvul.001G173700
Pl01G0000322300.v1	Pl01	39172653	39180132				x				Phvul.001G174500	Phvul.001G174500
Pl01G0000325000.v1	Pl01	39395792	39398042							x	Phvul.001G176800	Phvul.001G176800
Pl01G0000326800.v1	Pl01	39632366	39637353							x	Phvul.001G178400	Phvul.001G178400	Schmutz et al. 2014
Pl01G0000334300.v1	Pl01	40354993	40356897							x	Phvul.001G184100	Phvul.001G184100
Pl01G0000335100.v1	Pl01	40408418	40410056						x		Phvul.001G184900	Phvul.001G184900
Pl01G0000335500.v1	Pl01	40444372	40446478				x				Phvul.001G185400	Phvul.001G185400
Pl01G0000337400.v1	Pl01	40605517	40620005							x	Phvul.001G186600	Phvul.001G186600
Pl01G0000339300.v1	Pl01	40853220	40857540							x	Phvul.001G188100	Phvul.001G188100
Pl01G0000347600.v1	Pl01	41597736	41601368				x				Phvul.001G195500	Phvul.001G195500
Pl01G0000354700.v1	Pl01	42225283	42229056				x				Phvul.001G202600	Phvul.001G202600
Pl01G0000365300.v1	Pl01	43051308	43052622					x			Phvul.001G213600	Phvul.001G213600
Pl01G0000365700.v1	Pl01	43076943	43081376							x	Phvul.001G214000	Phvul.001G214000
Pl01G0000366200.v1	Pl01	43143550	43145483					x			Phvul.001G214400	Phvul.001G214400
Pl01G0000369000.v1	Pl01	43381095	43383850							x	Phvul.001G216800	Phvul.001G216800, Phvul.007G210500
Pl01G0000370600.v1	Pl01	43496062	43500011					x			Phvul.001G218500	Phvul.001G218500
Pl01G0000375000.v1	Pl01	43875063	43878889							x	Phvul.001G222700	Phvul.001G222700
Pl01G0000380200.v1	Pl01	44261155	44261775							x	Phvul.001G226900	Phvul.001G226900	Schmutz et al. 2014
Pl01G0000380900.v1	Pl01	44306343	44311631							x	Phvul.001G227600	Phvul.001G227600
Pl01G0000384300.v1	Pl01	44659262	44662692							x	Phvul.001G231200	Phvul.001G231200
Pl01G0000385500.v1	Pl01	44754615	44758368							x	Phvul.001G232300	Phvul.001G232300
Pl01G0000386300.v1	Pl01	44824039	44827438							x	Phvul.001G233000	Phvul.001G233000
Pl01G0000386400.v1	Pl01	44829938	44833079							x	Phvul.001G233000	Phvul.001G233000
Pl01G0000386500.v1	Pl01	44835377	44839426							x	Phvul.001G233100	Phvul.001G233100
Pl01G0000387600.v1	Pl01	44950602	44953272							x	Phvul.001G234200	Phvul.001G234200
Pl01G0000389700.v1	Pl01	45125846	45128989							x	Phvul.001G236600	Phvul.001G236600
Pl01G0000392700.v1	Pl01	45353541	45355061							x	Phvul.001G239200	Phvul.001G239200
Pl01G0000393900.v1	Pl01	45439505	45440652				x				Phvul.001G240400	Phvul.001G240400
Pl01G0000397200.v1	Pl01	45729163	45730638							x	Phvul.001G243500	Phvul.001G243500	Murube et al. 2019
Pl01G0000397400.v1	Pl01	45733376	45734518							x	Phvul.001G243600	Phvul.001G243600
Pl01G0000397500.v1	Pl01	45734746	45736114							x	Phvul.001G243700	Phvul.001G243700
Pl01G0000397600.v1	Pl01	45738863	45742049							x	Phvul.001G243800	Phvul.001G243800, Phvul.004G161500	Murube et al. 2019
Pl01G0000399100.v1	Pl01	45886549	45891340				x				Phvul.001G245300	Phvul.001G245300
Pl01G0000401100.v1	Pl01	46033108	46036474				x				Phvul.001G246800	Phvul.001G246800
Pl01G0000403100.v1	Pl01	46149162	46151368							x	Phvul.001G248700	Phvul.001G248700
Pl01G0000407300.v1	Pl01	46490354	46497286				x				Phvul.001G252800	Phvul.001G252800	Schmutz et al. 2014
Pl01G0000408500.v1	Pl01	46606935	46609415						x		Phvul.001G254000	Phvul.001G254000
Pl01G0000412500.v1	Pl01	46852001	46852692				x
Pl01G0000420000.v1	Pl01	47331204	47335091				x				Phvul.001G265500	Phvul.001G265500
Pl02G0000001700.v1	Pl02	144044	145572				x
Pl02G0000002800.v1	Pl02	217447	218502				x				Phvul.002G052600	Phvul.002G052600
Pl02G0000002900.v1	Pl02	224107	225540				x
Pl02G0000005200.v1	Pl02	355744	361100							x	Phvul.002G049500	Phvul.002G049500
Pl02G0000005300.v1	Pl02	362577	364484							x	Phvul.002G049500	Phvul.002G049400, Phvul.002G049500
Pl02G0000005400.v1	Pl02	365315	366289							x	Phvul.002G049500
Pl02G0000005500.v1	Pl02	372683	376099							x	Phvul.002G049400
Pl02G0000005600.v1	Pl02	378720	381199							x	Phvul.002G049300	Phvul.002G049300
Pl02G0000006600.v1	Pl02	451763	455035						x		Phvul.002G048200	Phvul.002G048200
Pl02G0000006900.v1	Pl02	482888	484477				x				Phvul.002G047900
Pl02G0000008300.v1	Pl02	596197	598548							x	Phvul.002G046500	Phvul.002G046500
Pl02G0000008400.v1	Pl02	599056	601910							x	Phvul.002G046100	Phvul.002G046100
Pl02G0000008600.v1	Pl02	608021	611043							x		Phvul.002G046500
Pl02G0000009000.v1	Pl02	626753	629154							x	Phvul.002G046100	Phvul.002G046100
Pl02G0000011700.v1	Pl02	773885	776287							x	Phvul.002G043600	Phvul.002G043600
Pl02G0000021200.v1	Pl02	1334558	1338059							x	Phvul.002G034800	Phvul.002G034800
Pl02G0000024500.v1	Pl02	1570115	1571355					x			Phvul.002G163400
Pl02G0000025800.v1	Pl02	1657355	1660311				x				Phvul.002G162400	Phvul.002G162400
Pl02G0000026700.v1	Pl02	1715269	1718674					x			Phvul.002G161400	Phvul.002G161400
Pl02G0000027900.v1	Pl02	1816191	1817062					x			Phvul.002G160100
Pl02G0000029700.v1	Pl02	1938880	1941879		x						Phvul.002G158300	Phvul.002G158300
Pl02G0000031500.v1	Pl02	2074000	2079201				x				Phvul.002G156600	Phvul.002G156600
Pl02G0000033400.v1	Pl02	2217534	2223596							x	Phvul.002G154800	Phvul.002G154800	Schmutz et al. 2014
Pl02G0000036300.v1	Pl02	2465552	2469019				x				Phvul.002G152100	Phvul.002G152100
Pl02G0000038900.v1	Pl02	2708703	2711228				x				Phvul.002G149700	Phvul.002G149700
Pl02G0000042100.v1	Pl02	3071402	3075658							x	Phvul.002G146300	Phvul.002G146300	Schmutz et al. 2014
Pl02G0000044600.v1	Pl02	3275292	3284868				x				Phvul.002G143400	Phvul.002G143400
Pl02G0000050600.v1	Pl02	3882423	3888410						x		Phvul.002G137000	Phvul.002G137000
Pl02G0000052500.v1	Pl02	4073522	4076839			x					Phvul.002G135100	Phvul.002G135100	Meziadi et al. 2016; Richard et al. 2018
Pl02G0000055400.v1	Pl02	4268067	4272118			x					Phvul.002G133600	Phvul.002G133600	Meziadi et al. 2016; Richard et al. 2018
Pl02G0000055500.v1	Pl02	4284006	4288080			x	x				Phvul.002G133400	Phvul.002G133400	Meziadi et al. 2016; Richard et al. 2018
Pl02G0000057700.v1	Pl02	4471114	4474574			x					Phvul.002G131200	Phvul.002G131200	Meziadi et al. 2016; Richard et al. 2018
Pl02G0000058100.v1	Pl02	4502377	4545777			x					Phvul.002G131200	Phvul.002G131200	Meziadi et al. 2016; Richard et al. 2018
Pl02G0000058200.v1	Pl02	4528079	4532033			x					Phvul.002G130100
Pl02G0000058500.v1	Pl02	4565207	4569132			x					Phvul.002G129600
Pl02G0000060400.v1	Pl02	4695061	4698249				x				Phvul.002G127800	Phvul.002G127800
Pl02G0000061600.v1	Pl02	4835037	4836536				x				Phvul.002G126600	Phvul.002G126600
Pl02G0000061700.v1	Pl02	4836820	4837609							x	Phvul.002G126600	Phvul.002G126600
Pl02G0000062200.v1	Pl02	4867688	4876303				x				Phvul.002G125100	Phvul.002G125100
Pl02G0000062600.v1	Pl02	4894434	4897791							x	Phvul.002G124700	Phvul.002G124700
Pl02G0000062800.v1	Pl02	4910777	4914159				x				Phvul.002G124300	Phvul.002G124300
Pl02G0000062900.v1	Pl02	4915840	4916294							x
Pl02G0000063600.v1	Pl02	4970266	4973448				x				Phvul.002G123500	Phvul.002G123500
Pl02G0000063900.v1	Pl02	4993164	4996881				x				Phvul.002G123200	Phvul.002G123200
Pl02G0000067200.v1	Pl02	5329850	5333300							x	Phvul.002G119900	Phvul.002G119900
Pl02G0000068800.v1	Pl02	5473906	5475909				x				Phvul.002G118400	Phvul.002G118400
Pl02G0000069700.v1	Pl02	5550032	5555276							x	Phvul.002G117600	Phvul.002G117600
Pl02G0000070200.v1	Pl02	5582386	5586013							x	Phvul.002G117100	Phvul.002G117100
Pl02G0000071600.v1	Pl02	5689552	5692393							x	Phvul.002G115900	Phvul.002G115900
Pl02G0000071700.v1	Pl02	5700101	5702471							x	Phvul.002G115800	Phvul.002G115800
Pl02G0000075100.v1	Pl02	5964625	5977996							x	Phvul.002G112500	Phvul.002G112500	Schmutz et al. 2014
Pl02G0000083600.v1	Pl02	6758665	6763516				x				Phvul.002G111200	Phvul.002G111100
Pl02G0000084500.v1	Pl02	6910294	6912301				x				Phvul.002G112100	Phvul.002G112100
Pl02G0000086000.v1	Pl02	7068649	7071717			x	x				Phvul.002G166400	Phvul.002G166400	Meziadi et al. 2016; Richard et al. 2018
Pl02G0000093300.v1	Pl02	7565222	7572572							x	Phvul.002G029200	Phvul.002G029200
Pl02G0000095600.v1	Pl02	7745749	7747978						x		Phvul.002G027200	Phvul.002G027200
Pl02G0000097200.v1	Pl02	7904325	7906217							x	Phvul.002G025700	Phvul.002G025700	Schmutz et al. 2014
Pl02G0000097300.v1	Pl02	7918641	7920434							x	Phvul.002G025500	Phvul.002G025500
Pl02G0000100800.v1	Pl02	8183446	8187325							x	Phvul.002G023400	Phvul.002G023400
Pl02G0000103000.v1	Pl02	8326717	8332467			x	x				Phvul.002G021700	Phvul.002G021700	Meziadi et al. 2016; Richard et al. 2018
Pl02G0000107500.v1	Pl02	8837325	8841343							x	Phvul.002G017700	Phvul.002G017700
Pl02G0000108100.v1	Pl02	8880053	8882724				x				Phvul.002G017400	Phvul.002G017400
Pl02G0000110000.v1	Pl02	9080587	9083022					x			Phvul.002G016100	Phvul.002G016100
Pl02G0000110600.v1	Pl02	9157312	9160443				x				Phvul.002G015600	Phvul.002G015600
Pl02G0000118100.v1	Pl02	9949825	9952616				x				Phvul.002G009000	Phvul.002G009000
Pl02G0000118800.v1	Pl02	10050953	10053324						x		Phvul.002G008600	Phvul.002G008600
Pl02G0000119700.v1	Pl02	10113387	10118011				x				Phvul.002G007800	Phvul.002G007800
Pl02G0000119900.v1	Pl02	10143410	10146899				x				Phvul.002G007600	Phvul.002G007600
Pl02G0000125700.v1	Pl02	10850928	10853195							x	Phvul.002G002600	Phvul.002G002600
Pl02G0000126200.v1	Pl02	10882754	10886531							x	Phvul.002G002200	Phvul.002G002200	Schmutz et al. 2014
Pl02G0000128400.v1	Pl02	11060230	11063029							x	Phvul.002G000200	Phvul.002G000200, Phvul.002G055600
Pl02G0000128500.v1	Pl02	11086062	11088472							x	Phvul.002G055600	Phvul.002G000200, Phvul.002G055600
Pl02G0000129300.v1	Pl02	11150843	11153147						x		Phvul.002G056300	Phvul.002G056300
Pl02G0000136400.v1	Pl02	11796396	11799718				x				Phvul.002G060200	Phvul.002G060200
Pl02G0000137300.v1	Pl02	11854269	11858657							x	Phvul.002G059500	Phvul.002G059500	Schmutz et al. 2014
Pl02G0000138300.v1	Pl02	11986496	11990150							x	Phvul.002G063600	Phvul.002G063600
Pl02G0000138600.v1	Pl02	12005732	12011039							x	Phvul.002G063900	Phvul.002G063700, Phvul.002G063900
Pl02G0000139300.v1	Pl02	12107462	12113008				x				Phvul.002G064400	Phvul.002G064400	Schmutz et al. 2014
Pl02G0000140400.v1	Pl02	12280717	12282396							x		Phvul.001G167700
Pl02G0000141500.v1	Pl02	12356583	12361644							x	Phvul.002G070900	Phvul.002G070900, Phvul.007G002400, Phvul.007G084600, Phvul.008G003200	Schmutz et al. 2014
Pl02G0000142600.v1	Pl02	12496360	12499437				x				Phvul.002G071800	Phvul.002G071800
Pl02G0000147300.v1	Pl02	13011066	13015756							x	Phvul.002G073500	Phvul.002G073500
Pl02G0000149800.v1	Pl02	13251229	13253828			x
Pl02G0000150200.v1	Pl02	13280918	13281607				x
Pl02G0000150300.v1	Pl02	13298371	13301168			x
Pl02G0000150400.v1	Pl02	13305479	13307173				x				Phvul.002G074500	Phvul.002G074500
Pl02G0000150600.v1	Pl02	13320585	13325231			x					Phvul.002G074700	Phvul.002G074700
Pl02G0000151900.v1	Pl02	13493000	13496323			x					Phvul.002G075000	Phvul.002G075000	Meziadi et al. 2016; Richard et al. 2018
Pl02G0000152100.v1	Pl02	13546074	13549550			x					Phvul.002G075300	Phvul.002G075300
Pl02G0000152400.v1	Pl02	13630764	13640905				x				Phvul.002G075400	Phvul.002G075400, Phvul.002G075500
Pl02G0000157700.v1	Pl02	14361864	14366671		x	x					Phvul.002G079200	Phvul.002G079200	Meziadi et al. 2016; Richard et al. 2018
Pl02G0000158300.v1	Pl02	14424617	14426987				x				Phvul.002G079700	Phvul.002G079700
Pl02G0000159200.v1	Pl02	14492790	14494270							x	Phvul.002G080000	Phvul.002G080000
Pl02G0000160400.v1	Pl02	14619504	14623027							x	Phvul.002G080400	Phvul.002G080400
Pl02G0000162100.v1	Pl02	14822814	14827532				x				Phvul.002G081300	Phvul.002G081300
Pl02G0000163300.v1	Pl02	14961656	14965442					x			Phvul.002G081600	Phvul.002G081600	Schmutz et al. 2014
Pl02G0000176900.v1	Pl02	16912906	16915484						x		Phvul.002G088600	Phvul.002G088600
Pl02G0000178900.v1	Pl02	17176561	17180344							x	Phvul.002G089100	Phvul.002G089100
Pl02G0000179800.v1	Pl02	17325900	17329170				x				Phvul.002G089300	Phvul.002G089300
Pl02G0000180600.v1	Pl02	17377178	17379261					x
Pl02G0000181800.v1	Pl02	17516062	17520546							x		Phvul.002G065500, Phvul.002G066400
Pl02G0000182600.v1	Pl02	17634381	17638770							x		Phvul.002G065500, Phvul.002G066400
Pl02G0000185400.v1	Pl02	18115848	18117445						x			Phvul.002G067200
Pl02G0000203800.v1	Pl02	20722513	20729088							x		Phvul.002G091900
Pl02G0000209800.v1	Pl02	21714949	21719916					x			Phvul.002G091100	Phvul.002G091100
Pl02G0000243700.v1	Pl02	27337911	27339152				x				Phvul.002G092300	Phvul.002G092300
Pl02G0000244700.v1	Pl02	27574539	27576631				x					Phvul.002G092200
Pl02G0000257500.v1	Pl02	29925823	29929841						x		Phvul.002G094100	Phvul.002G094100
Pl02G0000275000.v1	Pl02	32396679	32397551			x
Pl02G0000282700.v1	Pl02	33491969	33494676					x
Pl02G0000284900.v1	Pl02	33842458	33848950							x	Phvul.002G169100	Phvul.002G169100
Pl02G0000289300.v1	Pl02	34624870	34629441		x						Phvul.002G171400	Phvul.002G171400	Meziadi et al. 2016; Richard et al. 2018
Pl02G0000299600.v1	Pl02	35961288	35966682				x				Phvul.002G177200	Phvul.002G177200
Pl02G0000301300.v1	Pl02	36234730	36237980							x	Phvul.002G178400	Phvul.002G178400	Schmutz et al. 2014
Pl02G0000301600.v1	Pl02	36266664	36269485							x	Phvul.002G179600	Phvul.002G179600
Pl02G0000305400.v1	Pl02	36767029	36770041							x	Phvul.002G182500	Phvul.002G182500
Pl02G0000305900.v1	Pl02	36822071	36825502							x	Phvul.002G182900	Phvul.002G182900
Pl02G0000308500.v1	Pl02	37117907	37121305				x				Phvul.002G184800	Phvul.002G184800
Pl02G0000311600.v1	Pl02	37530757	37534679				x				Phvul.002G187300	Phvul.002G187300
Pl02G0000312900.v1	Pl02	37638911	37643510						x		Phvul.002G187900	Phvul.002G187900, Phvul.007G101200
Pl02G0000313000.v1	Pl02	37648582	37648959						x		Phvul.002G187900	Phvul.002G187900, Phvul.007G101200
Pl02G0000321400.v1	Pl02	38530359	38534644				x				Phvul.002G196200	Phvul.002G196200
Pl02G0000322000.v1	Pl02	38616235	38617808					x			Phvul.002G196800	Phvul.002G196800
Pl02G0000326500.v1	Pl02	39137051	39138735							x	Phvul.002G201400	Phvul.002G201400
Pl02G0000326700.v1	Pl02	39165506	39166257				x				Phvul.002G201700	Phvul.002G201700
Pl02G0000326800.v1	Pl02	39175982	39177659				x				Phvul.002G201800	Phvul.002G201800, Phvul.002G201900
Pl02G0000327000.v1	Pl02	39187576	39190931					x			Phvul.002G202000	Phvul.002G202000	Schmutz et al. 2014
Pl02G0000333700.v1	Pl02	39761356	39766570				x				Phvul.002G206900	Phvul.002G206900
Pl02G0000333800.v1	Pl02	39771124	39776236				x				Phvul.002G207000	Phvul.002G207000
Pl02G0000342700.v1	Pl02	40627790	40630107							x	Phvul.002G214900	Phvul.002G214900
Pl02G0000342800.v1	Pl02	40632480	40634492							x	Phvul.002G214900	Phvul.002G214900
Pl02G0000342900.v1	Pl02	40642198	40644233							x	Phvul.002G215200	Phvul.002G215200
Pl02G0000343000.v1	Pl02	40646935	40648848							x	Phvul.002G215300	Phvul.002G215300
Pl02G0000343100.v1	Pl02	40651625	40654705							x	Phvul.002G215400	Phvul.002G215400
Pl02G0000347100.v1	Pl02	40999289	41002189				x				Phvul.002G217900	Phvul.002G217900
Pl02G0000348500.v1	Pl02	41091353	41095047							x	Phvul.002G218800	Phvul.002G218800
Pl02G0000349800.v1	Pl02	41253746	41260957							x	Phvul.002G219900	Phvul.002G219900
Pl02G0000349900.v1	Pl02	41261212	41265334							x	Phvul.002G220000	Phvul.002G220000, Phvul.002G220100
Pl02G0000350000.v1	Pl02	41266223	41274755							x	Phvul.002G220200	Phvul.002G220200
Pl02G0000350300.v1	Pl02	41297146	41301407							x	Phvul.002G220500	Phvul.002G220500
Pl02G0000351600.v1	Pl02	41427219	41430875				x				Phvul.002G221400	Phvul.002G221400	Schmutz et al. 2014
Pl02G0000354600.v1	Pl02	41797516	41804757				x				Phvul.002G224200	Phvul.002G224200
Pl02G0000355400.v1	Pl02	41899123	41899889		x						Phvul.002G225400	Phvul.002G225400
Pl02G0000357900.v1	Pl02	42133601	42137536							x	Phvul.002G227300	Phvul.002G227300
Pl02G0000360200.v1	Pl02	42417082	42420995							x	Phvul.002G229000	Phvul.002G229000
Pl02G0000362400.v1	Pl02	42629377	42635621				x				Phvul.002G230800	Phvul.002G230800
Pl02G0000364100.v1	Pl02	42832213	42836509				x				Phvul.002G232600	Phvul.002G232600
Pl02G0000364200.v1	Pl02	42846971	42847969							x	Phvul.002G232700	Phvul.002G232700
Pl02G0000369000.v1	Pl02	43387134	43389418							x	Phvul.002G238800	Phvul.002G238800
Pl02G0000369100.v1	Pl02	43398172	43403951				x				Phvul.002G238900	Phvul.002G238900	Schmutz et al. 2014
Pl02G0000369600.v1	Pl02	43457415	43460129				x				Phvul.002G239400	Phvul.002G239400
Pl02G0000369800.v1	Pl02	43488434	43492380							x	Phvul.002G239600	Phvul.002G239600
Pl02G0000370100.v1	Pl02	43514116	43515345				x				Phvul.002G240100	Phvul.002G240100
Pl02G0000370900.v1	Pl02	43618397	43620458					x			Phvul.002G240900	Phvul.002G240900
Pl02G0000372800.v1	Pl02	43766698	43780414				x				Phvul.002G242600	Phvul.002G242600
Pl02G0000377600.v1	Pl02	44157116	44163446						x		Phvul.002G246800	Phvul.002G246800
Pl02G0000377900.v1	Pl02	44204456	44210415							x	Phvul.002G247100	Phvul.002G247100
Pl02G0000378800.v1	Pl02	44287422	44295322						x		Phvul.002G247800	Phvul.002G247800
Pl02G0000378900.v1	Pl02	44297442	44303626							x	Phvul.002G247900	Phvul.002G247900
Pl02G0000380500.v1	Pl02	44415740	44420065							x	Phvul.002G249300	Phvul.002G249300
Pl02G0000380700.v1	Pl02	44430460	44432454							x	Phvul.002G249500	Phvul.002G249500
Pl02G0000383200.v1	Pl02	44618797	44621958				x				Phvul.002G251400	Phvul.002G251400
Pl02G0000383400.v1	Pl02	44629349	44632512				x				Phvul.002G251400	Phvul.002G215100, Phvul.002G251400
Pl02G0000384600.v1	Pl02	44716592	44718052							x	Phvul.002G252500	Phvul.002G252500
Pl02G0000388900.v1	Pl02	45035076	45037811						x		Phvul.002G260700	Phvul.002G260700
Pl02G0000389500.v1	Pl02	45142120	45145551							x	Phvul.002G261200	Phvul.002G261200
Pl02G0000390600.v1	Pl02	45222404	45229931				x				Phvul.002G257000	Phvul.002G257000
Pl02G0000398600.v1	Pl02	45866163	45867723					x			Phvul.002G265400	Phvul.002G265400	Schmutz et al. 2014
Pl02G0000399600.v1	Pl02	45972611	45974943					x			Phvul.002G266400	Phvul.002G266400	Schmutz et al. 2014
Pl02G0000403300.v1	Pl02	46258075	46267874				x				Phvul.002G270100	Phvul.002G270100
Pl02G0000411100.v1	Pl02	46897491	46903545				x				Phvul.002G276900	Phvul.002G276900
Pl02G0000412400.v1	Pl02	47027971	47032091							x	Phvul.002G278200	Phvul.002G278200
Pl02G0000423500.v1	Pl02	47940652	47946249				x				Phvul.002G287900	Phvul.002G287900
Pl02G0000424600.v1	Pl02	48002349	48012462							x	Phvul.002G289000	Phvul.002G289000
Pl02G0000428800.v1	Pl02	48446361	48448607					x			Phvul.002G293200	Phvul.002G293200	Schmutz et al. 2014
Pl02G0000431400.v1	Pl02	48679378	48682765				x				Phvul.002G295600	Phvul.002G295600	Schmutz et al. 2014
Pl02G0000432900.v1	Pl02	48770036	48772879					x			Phvul.002G297100	Phvul.002G297100
Pl02G0000433600.v1	Pl02	48825509	48829596				x				Phvul.002G297700	Phvul.002G297700
Pl02G0000437900.v1	Pl02	49130849	49136185							x	Phvul.002G301900	Phvul.002G301900, Phvul.004G178600
Pl02G0000438300.v1	Pl02	49206579	49212016							x	Phvul.002G302300	Phvul.002G302300
Pl02G0000438600.v1	Pl02	49236230	49239567				x				Phvul.002G302600	Phvul.002G302600
Pl02G0000438700.v1	Pl02	49241853	49245705							x	Phvul.002G302700	Phvul.002G302700
Pl02G0000440800.v1	Pl02	49424767	49429059							x	Phvul.002G304500	Phvul.002G304500
Pl02G0000443400.v1	Pl02	49645215	49647324				x				Phvul.002G307200	Phvul.002G307200
Pl02G0000446100.v1	Pl02	49843382	49845868				x				Phvul.002G310000	Phvul.002G310000	Schmutz et al. 2014
Pl02G0000450500.v1	Pl02	50201832	50204941				x				Phvul.002G314200	Phvul.002G314200
Pl02G0000454400.v1	Pl02	50539208	50544631							x	Phvul.002G318300	Phvul.002G318300	Schmutz et al. 2014
Pl02G0000459200.v1	Pl02	50903173	50904591				x				Phvul.002G323800	Phvul.002G323800
Pl02G0000459300.v1	Pl02	50906415	50909077		x
Pl02G0000459500.v1	Pl02	50912349	50913767				x				Phvul.002G323800	Phvul.002G323800
Pl02G0000459700.v1	Pl02	50925393	50927159				x				Phvul.002G323800	Phvul.002G323800
Pl02G0000459900.v1	Pl02	50938779	50947208		x	x					Phvul.002G323800	Phvul.002G323800
Pl02G0000460000.v1	Pl02	50951925	50955418				x				Phvul.002G323800	Phvul.002G323800
Pl02G0000460400.v1	Pl02	50970502	50972028				x				Phvul.002G323800	Phvul.002G323800
Pl02G0000461200.v1	Pl02	51036271	51039470				x				Phvul.002G324600	Phvul.002G324600
Pl02G0000464600.v1	Pl02	51275749	51284674							x	Phvul.002G328800	Phvul.002G328800
Pl02G0000467000.v1	Pl02	51394333	51402755				x				Phvul.002G331100	Phvul.002G331100
Pl02G0000467300.v1	Pl02	51422086	51426005				x				Phvul.002G331400	Phvul.002G331400
Pl02G0000469000.v1	Pl02	51529943	51532871						x		Phvul.002G333100	Phvul.002G333100
Pl03G0000001900.v1	Pl03	124363	127257				x				Phvul.003G001500	Phvul.003G001500, Phvul.009G235000
Pl03G0000002900.v1	Pl03	239428	249753				x				Phvul.003G002300	Phvul.003G002300, Phvul.003G002400, Phvul.003G002500, Phvul.003G002600, Phvul.003G002700, Phvul.003G002800, Phvul.003G003000
Pl03G0000003100.v1	Pl03	260015	261649			x					Phvul.003G002300	Phvul.003G002300, Phvul.003G002400, Phvul.003G002500, Phvul.003G002600, Phvul.003G002700, Phvul.003G002800, Phvul.003G003000
Pl03G0000003200.v1	Pl03	267494	276464			x	x				Phvul.003G002400	Phvul.003G002300, Phvul.003G002400, Phvul.003G002500, Phvul.003G002600, Phvul.003G002700, Phvul.003G002800, Phvul.003G003000
Pl03G0000003300.v1	Pl03	285194	295724			x					Phvul.003G002400	Phvul.003G002300, Phvul.003G002400, Phvul.003G002500, Phvul.003G002600, Phvul.003G002700, Phvul.003G002800, Phvul.003G003000
Pl03G0000003400.v1	Pl03	308758	319453			x					Phvul.003G002600	Phvul.003G002300, Phvul.003G002400, Phvul.003G002500, Phvul.003G002600, Phvul.003G002700, Phvul.003G002800, Phvul.003G003000
Pl03G0000003600.v1	Pl03	327113	336471				x				Phvul.003G002700	Phvul.003G002300, Phvul.003G002400, Phvul.003G002500, Phvul.003G002600, Phvul.003G002700, Phvul.003G002800, Phvul.003G003000
Pl03G0000003900.v1	Pl03	373321	378665			x					Phvul.003G002800	Phvul.003G002300, Phvul.003G002400, Phvul.003G002500, Phvul.003G002600, Phvul.003G002700, Phvul.003G002800, Phvul.003G003000
Pl03G0000014200.v1	Pl03	1192200	1194666				x				Phvul.003G011500	Phvul.003G011500, Phvul.009G062000
Pl03G0000015300.v1	Pl03	1272152	1275723							x	Phvul.003G012300	Phvul.003G012300
Pl03G0000019000.v1	Pl03	1608932	1613809				x				Phvul.003G015800	Phvul.003G015800
Pl03G0000019100.v1	Pl03	1620988	1624158							x	Phvul.003G015900	Phvul.003G015900
Pl03G0000024300.v1	Pl03	2096255	2101042							x	Phvul.003G021700	Phvul.003G021700
Pl03G0000026500.v1	Pl03	2319532	2324740							x	Phvul.003G024000	Phvul.003G024000
Pl03G0000027700.v1	Pl03	2521198	2523894				x				Phvul.003G025400	Phvul.003G025400
Pl03G0000029900.v1	Pl03	2771690	2783584				x				Phvul.003G027500	Phvul.003G027500
Pl03G0000032500.v1	Pl03	3113364	3118524				x				Phvul.003G029700	Phvul.003G029700
Pl03G0000032800.v1	Pl03	3139744	3142909							x	Phvul.003G030000	Phvul.003G030000
Pl03G0000042000.v1	Pl03	4304936	4307377							x	Phvul.003G038700	Phvul.003G038700	Schmutz et al. 2014
Pl03G0000042100.v1	Pl03	4308852	4311383							x	Phvul.003G038800	Phvul.003G038800
Pl03G0000043600.v1	Pl03	4599228	4602889				x				Phvul.003G040200	Phvul.003G040200
Pl03G0000047600.v1	Pl03	5229468	5234783				x				Phvul.003G044400	Phvul.003G044400
Pl03G0000047700.v1	Pl03	5242595	5244955				x				Phvul.003G044500	Phvul.003G044500
Pl03G0000052300.v1	Pl03	5766833	5772111							x		Phvul.003G027600
Pl03G0000059000.v1	Pl03	6566462	6569575							x	Phvul.003G052300	Phvul.003G052300
Pl03G0000069500.v1	Pl03	7842832	7847031			x
Pl03G0000071200.v1	Pl03	8083267	8088794							x	Phvul.003G060600	Phvul.003G060600, Phvul.007G002400
Pl03G0000074000.v1	Pl03	8407670	8411000							x	Phvul.003G062600	Phvul.003G062600
Pl03G0000074200.v1	Pl03	8430543	8434000							x	Phvul.003G062700	Phvul.003G062700	Schmutz et al. 2014
Pl03G0000075300.v1	Pl03	8575974	8580888							x	Phvul.003G063700	Phvul.003G063700
Pl03G0000078400.v1	Pl03	9061037	9062906					x			Phvul.003G068700	Phvul.003G068700	Schmutz et al. 2014
Pl03G0000078700.v1	Pl03	9088420	9092516				x				Phvul.003G068400	Phvul.003G068400
Pl03G0000079000.v1	Pl03	9133857	9135949				x				Phvul.003G068100	Phvul.003G068100	Schmutz et al. 2014
Pl03G0000079700.v1	Pl03	9240174	9242957							x	Phvul.003G067900	Phvul.003G067900
Pl03G0000080600.v1	Pl03	9361826	9364462						x		Phvul.003G067700	Phvul.003G067700
Pl03G0000084600.v1	Pl03	10014304	10016607						x		Phvul.003G070300	Phvul.003G070300
Pl03G0000085600.v1	Pl03	10176711	10178210		x						Phvul.003G070900	Phvul.003G070900	Schmutz et al. 2014
Pl03G0000087100.v1	Pl03	10305688	10307616				x				Phvul.003G071800	Phvul.003G071800
Pl03G0000088200.v1	Pl03	10460428	10466484		x	x	x				Phvul.003G072500	Phvul.003G072500	Meziadi et al. 2016; Richard et al. 2018
Pl03G0000088300.v1	Pl03	10524804	10528259				x				Phvul.003G072500	Phvul.003G072500	Meziadi et al. 2016; Richard et al. 2018
Pl03G0000096800.v1	Pl03	11941779	11950421				x				Phvul.003G077100	Phvul.003G077100
Pl03G0000130100.v1	Pl03	16955327	16958364							x	Phvul.003G082800	Phvul.003G082800
Pl03G0000144200.v1	Pl03	18560368	18561797							x	Phvul.003G087900	Phvul.003G087900
Pl03G0000144600.v1	Pl03	18581142	18583119							x	Phvul.003G088000	Phvul.003G088000
Pl03G0000149200.v1	Pl03	19079947	19086170				x				Phvul.003G090000	Phvul.003G090000
Pl03G0000163900.v1	Pl03	20732227	20734370							x	Phvul.003G101800	Phvul.003G101800
Pl03G0000165100.v1	Pl03	20839609	20844831							x	Phvul.003G100900	Phvul.003G100900
Pl03G0000169200.v1	Pl03	21238679	21244153				x				Phvul.003G097600	Phvul.003G097600
Pl03G0000169500.v1	Pl03	21275861	21280499				x
Pl03G0000172600.v1	Pl03	21696301	21708217			x
Pl03G0000180900.v1	Pl03	22553226	22561125							x	Phvul.003G114400	Phvul.003G114400
Pl03G0000184200.v1	Pl03	22870560	22872328					x			Phvul.003G116300	Phvul.002G127300, Phvul.003G116300	Schmutz et al. 2014
Pl03G0000189200.v1	Pl03	23511533	23514481							x	Phvul.003G120800	Phvul.003G120800
Pl03G0000189400.v1	Pl03	23518180	23521489							x	Phvul.003G121000	Phvul.003G121000
Pl03G0000189900.v1	Pl03	23566042	23570897							x	Phvul.003G121600	Phvul.003G121600
Pl03G0000192800.v1	Pl03	23806187	23810677					x			Phvul.003G124000	Phvul.003G124000
Pl03G0000200600.v1	Pl03	24693102	24696051				x				Phvul.003G129400	Phvul.003G129400
Pl03G0000200900.v1	Pl03	24713553	24718927		x	x	x				Phvul.003G129700	Phvul.003G129700	Meziadi et al. 2016; Richard et al. 2018
Pl03G0000201600.v1	Pl03	24823830	24826817							x	Phvul.003G130400	Phvul.003G130400
Pl03G0000202700.v1	Pl03	24906245	24910779				x				Phvul.003G131200	Phvul.003G131200
Pl03G0000206500.v1	Pl03	25317560	25322901							x	Phvul.003G134500	Phvul.003G134500	Schmutz et al. 2014
Pl03G0000209900.v1	Pl03	25708424	25711273				x				Phvul.003G137700	Phvul.003G137700
Pl03G0000210200.v1	Pl03	25734269	25736235						x		Phvul.003G138200	Phvul.003G138200
Pl03G0000211000.v1	Pl03	25803372	25806068							x	Phvul.003G139200	Phvul.003G139200
Pl03G0000211100.v1	Pl03	25810902	25812851							x	Phvul.003G139300	Phvul.003G139300
Pl03G0000211300.v1	Pl03	25835565	25837687					x			Phvul.003G139500	Phvul.003G139500
Pl03G0000211700.v1	Pl03	25872322	25875816				x				Phvul.003G139800	Phvul.003G139800
Pl03G0000216900.v1	Pl03	26530561	26535273							x	Phvul.003G144200	Phvul.003G144200
Pl03G0000220900.v1	Pl03	27033487	27039950							x	Phvul.003G148100	Phvul.003G148100
Pl03G0000221500.v1	Pl03	27084225	27088573							x	Phvul.003G148600	Phvul.003G148600
Pl03G0000222400.v1	Pl03	27210116	27213113							x	Phvul.003G149100	Phvul.003G149100
Pl03G0000222500.v1	Pl03	27216695	27218195							x	Phvul.003G149200	Phvul.003G149200
Pl03G0000224300.v1	Pl03	27382228	27383187							x
Pl03G0000227600.v1	Pl03	27847547	27853096				x				Phvul.003G152900	Phvul.003G152900	Schmutz et al. 2014
Pl03G0000228800.v1	Pl03	27985614	27988806				x				Phvul.003G154000	Phvul.003G154000
Pl03G0000229800.v1	Pl03	28091738	28093682				x				Phvul.003G155100	Phvul.003G155100
Pl03G0000231100.v1	Pl03	28206428	28212611					x			Phvul.003G156300	Phvul.003G156300
Pl03G0000231300.v1	Pl03	28240648	28244172				x
Pl03G0000231900.v1	Pl03	28329008	28331023							x	Phvul.003G156900	Phvul.003G156900
Pl03G0000233900.v1	Pl03	28516868	28518926							x	Phvul.003G158600	Phvul.003G158600
Pl03G0000234000.v1	Pl03	28521457	28524769							x	Phvul.003G158700	Phvul.003G158700
Pl03G0000236700.v1	Pl03	28806492	28810462							x	Phvul.003G168000	Phvul.003G168000
Pl03G0000238800.v1	Pl03	29124091	29130083							x	Phvul.003G165700	Phvul.003G165700
Pl03G0000239000.v1	Pl03	29147439	29150305				x				Phvul.003G165500	Phvul.003G165500
Pl03G0000239800.v1	Pl03	29240840	29243712							x	Phvul.003G164800	Phvul.003G164800
Pl03G0000239900.v1	Pl03	29244270	29247280							x	Phvul.003G164700	Phvul.003G164700
Pl03G0000240800.v1	Pl03	29303438	29306416				x					Phvul.011G007900
Pl03G0000243500.v1	Pl03	29522592	29525006							x	Phvul.003G162100	Phvul.003G162100
Pl03G0000244400.v1	Pl03	29579885	29581607							x	Phvul.003G161500	Phvul.003G161500	Schmutz et al. 2014
Pl03G0000245600.v1	Pl03	29737511	29742973							x	Phvul.003G160500	Phvul.003G160500
Pl03G0000246300.v1	Pl03	29848249	29851306				x				Phvul.003G159700	Phvul.003G159700
Pl03G0000250100.v1	Pl03	30253113	30254993				x				Phvul.003G178800	Phvul.003G178800
Pl03G0000252100.v1	Pl03	30415233	30422189							x	Phvul.003G181000	Phvul.003G181000
Pl03G0000258900.v1	Pl03	31088373	31091987				x				Phvul.003G187200	Phvul.003G187200
Pl03G0000259800.v1	Pl03	31197800	31200268							x	Phvul.003G188000	Phvul.003G188000
Pl03G0000264000.v1	Pl03	31556046	31562699							x	Phvul.003G191400	Phvul.003G191400
Pl03G0000264600.v1	Pl03	31641625	31645333					x			Phvul.003G192000	Phvul.003G192000
Pl03G0000265700.v1	Pl03	31753622	31755872						x		Phvul.003G192900	Phvul.003G192900
Pl03G0000265900.v1	Pl03	31765233	31769779				x				Phvul.003G193100	Phvul.003G193100
Pl03G0000268400.v1	Pl03	32013430	32017892							x	Phvul.003G195500	Phvul.003G195500
Pl03G0000273200.v1	Pl03	32516964	32524810							x		Phvul.003G174700
Pl03G0000275500.v1	Pl03	32714141	32723831				x					Phvul.003G172400
Pl03G0000277800.v1	Pl03	32959060	32963715							x		Phvul.003G170200
Pl03G0000282600.v1	Pl03	33411752	33413839				x				Phvul.003G204700	Phvul.003G204700
Pl03G0000282800.v1	Pl03	33432067	33438051							x	Phvul.003G204400	Phvul.003G204400
Pl03G0000284600.v1	Pl03	33667002	33671658				x				Phvul.003G203100	Phvul.003G203100
Pl03G0000285600.v1	Pl03	33786565	33789378				x				Phvul.003G202100	Phvul.003G202100
Pl03G0000285700.v1	Pl03	33793776	33796970							x	Phvul.003G202000	Phvul.003G202000
Pl03G0000287800.v1	Pl03	34001640	34004895							x	Phvul.003G199900	Phvul.003G199900
Pl03G0000288300.v1	Pl03	34087154	34091223							x	Phvul.003G199400	Phvul.003G199400
Pl03G0000292200.v1	Pl03	34630407	34633274				x				Phvul.003G241400	Phvul.003G241400	Schmutz et al. 2014
Pl03G0000292600.v1	Pl03	34661151	34664152					x			Phvul.003G240900	Phvul.002G127300, Phvul.003G240900
Pl03G0000293100.v1	Pl03	34741283	34744361				x				Phvul.003G240400	Phvul.003G240400
Pl03G0000294100.v1	Pl03	34879936	34882446							x	Phvul.003G239500	Phvul.003G239500
Pl03G0000294200.v1	Pl03	34889325	34891846							x	Phvul.003G239500	Phvul.003G239500
Pl03G0000301500.v1	Pl03	35752478	35754117						x		Phvul.003G232000	Phvul.003G232000
Pl03G0000302100.v1	Pl03	35834105	35850032				x				Phvul.003G231400	Phvul.003G231400
Pl03G0000303900.v1	Pl03	36143856	36146575				x				Phvul.003G229900	Phvul.003G229900
Pl03G0000304700.v1	Pl03	36220891	36226277							x	Phvul.003G229100	Phvul.003G229100
Pl03G0000307200.v1	Pl03	36542027	36545092							x	Phvul.003G226700	Phvul.003G226700
Pl03G0000308200.v1	Pl03	36637135	36640793							x	Phvul.003G225800	Phvul.003G225800
Pl03G0000311700.v1	Pl03	37038668	37040622						x		Phvul.003G223200	Phvul.003G223200
Pl03G0000321700.v1	Pl03	38180021	38182369				x				Phvul.003G214800	Phvul.003G214800
Pl03G0000331800.v1	Pl03	39133022	39134499							x
Pl03G0000334500.v1	Pl03	39442195	39448764							x	Phvul.003G247000	Phvul.003G247000
Pl03G0000334600.v1	Pl03	39457539	39462295			x	x				Phvul.003G247200	Phvul.003G247200	Meziadi et al. 2016; Richard et al. 2018
Pl03G0000334700.v1	Pl03	39468110	39471120			x	x				Phvul.003G247300	Phvul.003G247300	Meziadi et al. 2016; Richard et al. 2018
Pl03G0000334800.v1	Pl03	39477102	39480373			x	x				Phvul.003G247400	Phvul.003G247400	Meziadi et al. 2016; Richard et al. 2018
Pl03G0000334900.v1	Pl03	39485328	39488408			x					Phvul.003G247500	Phvul.003G247500	Meziadi et al. 2016; Richard et al. 2018; Schmutz et al. 2014
Pl03G0000335000.v1	Pl03	39496753	39502411			x	x					Phvul.006G027700	Richard et al. 2018
Pl03G0000335100.v1	Pl03	39509897	39539106			x
Pl03G0000337500.v1	Pl03	39862424	39865946							x	Phvul.003G249300	Phvul.003G249300
Pl03G0000340200.v1	Pl03	40215232	40216438						x		Phvul.003G251800	Phvul.003G251800	Schmutz et al. 2014
Pl03G0000340400.v1	Pl03	40232148	40233863							x	Phvul.003G251900	Phvul.003G251900
Pl03G0000341400.v1	Pl03	40372152	40376092							x	Phvul.003G252900	Phvul.003G252900
Pl03G0000347100.v1	Pl03	41019277	41021023				x				Phvul.003G258700	Phvul.003G258700
Pl03G0000347200.v1	Pl03	41025775	41027685				x				Phvul.003G258800	Phvul.003G258800	Schmutz et al. 2014
Pl03G0000348700.v1	Pl03	41219316	41222804				x				Phvul.003G260300	Phvul.003G260300
Pl03G0000354500.v1	Pl03	41675654	41676503						x		Phvul.003G266100	Phvul.003G266100
Pl03G0000355400.v1	Pl03	41746709	41749242							x	Phvul.003G267000	Phvul.003G267000	Schmutz et al. 2014
Pl03G0000357600.v1	Pl03	41909239	41914037		x	x					Phvul.003G269200	Phvul.003G269200
Pl03G0000358100.v1	Pl03	41956464	41960976							x	Phvul.003G269700	Phvul.003G269700
Pl03G0000359100.v1	Pl03	42033467	42038486							x	Phvul.003G270500	Phvul.003G270500
Pl03G0000359600.v1	Pl03	42071686	42079399							x	Phvul.003G271000	Phvul.003G271000
Pl03G0000363200.v1	Pl03	42390699	42397428				x				Phvul.003G273700	Phvul.003G273700
Pl03G0000372800.v1	Pl03	43282922	43286147							x
Pl03G0000379700.v1	Pl03	43948534	43950582							x	Phvul.003G287100	Phvul.003G287100
Pl03G0000380800.v1	Pl03	44088412	44091803							x	Phvul.003G288300	Phvul.003G288300
Pl03G0000385100.v1	Pl03	44522651	44525255				x				Phvul.003G292500	Phvul.003G292500
Pl03G0000386300.v1	Pl03	44594816	44597881							x	Phvul.003G293600	Phvul.003G012300, Phvul.003G293600
Pl04G0000006000.v1	Pl04	384974	388586							x	Phvul.004G004800	Phvul.004G004800
Pl04G0000007200.v1	Pl04	490349	493697							x	Phvul.004G006600	Phvul.004G006600
Pl04G0000008200.v1	Pl04	601450	602820				x				Phvul.004G015800	Phvul.004G005600, Phvul.004G007700, Phvul.004G008100, Phvul.004G008300, Phvul.004G015800	Meziadi et al. 2016; Richard et al. 2018
Pl04G0000008300.v1	Pl04	602870	604905				x				Phvul.004G015800	Phvul.004G005600, Phvul.004G007700, Phvul.004G008100, Phvul.004G008800, Phvul.004G009100, Phvul.004G012900, Phvul.004G013000, Phvul.004G015800, Phvul.004G016000	Meziadi et al. 2016; Richard et al. 2018
Pl04G0000008500.v1	Pl04	627126	628496				x				Phvul.004G015800	Phvul.004G005600, Phvul.004G007700, Phvul.004G008100, Phvul.004G008300, Phvul.004G013000, Phvul.004G013100, Phvul.004G013300, Phvul.004G015800	Meziadi et al. 2016; Richard et al. 2018
Pl04G0000008600.v1	Pl04	628546	630641				x				Phvul.004G015800	Phvul.004G012800, Phvul.004G015800	Meziadi et al. 2016; Richard et al. 2018
Pl04G0000008900.v1	Pl04	660995	662644				x				Phvul.004G015800	Phvul.004G008900, Phvul.004G015800	Meziadi et al. 2016; Richard et al. 2018
Pl04G0000009000.v1	Pl04	663632	664398			x					Phvul.004G015800	Phvul.004G005600, Phvul.004G007900, Phvul.004G008000, Phvul.004G008100, Phvul.004G008300, Phvul.004G008400, Phvul.004G008700, Phvul.004G008800, Phvul.004G008900, Phvul.004G009300, Phvul.004G009800, Phvul.004G012800, Phvul.004G012900, Phvul.004G013000, Phvul.004G013100, Phvul.004G013300, Phvul.004G015700, Phvul.004G015800	Meziadi et al. 2016; Richard et al. 2018
Pl04G0000009400.v1	Pl04	689170	692721			x					Phvul.004G015800	Phvul.004G005600, Phvul.004G007900, Phvul.004G008000, Phvul.004G008100, Phvul.004G008300, Phvul.004G008400, Phvul.004G008700, Phvul.004G008800, Phvul.004G008900, Phvul.004G009300, Phvul.004G009800, Phvul.004G012800, Phvul.004G012900, Phvul.004G013000, Phvul.004G013100, Phvul.004G013300, Phvul.004G015700, Phvul.004G015800	Meziadi et al. 2016; Richard et al. 2018
Pl04G0000009500.v1	Pl04	711997	715335			x					Phvul.004G015800	Phvul.004G005600, Phvul.004G007900, Phvul.004G008000, Phvul.004G008100, Phvul.004G008300, Phvul.004G008400, Phvul.004G008700, Phvul.004G008800, Phvul.004G008900, Phvul.004G009300, Phvul.004G009800, Phvul.004G012800, Phvul.004G012900, Phvul.004G013000, Phvul.004G013100, Phvul.004G013300, Phvul.004G015700, Phvul.004G015800	Meziadi et al. 2016; Richard et al. 2018
Pl04G0000009700.v1	Pl04	744569	747928			x					Phvul.004G015800	Phvul.004G005600, Phvul.004G007900, Phvul.004G008000, Phvul.004G008100, Phvul.004G008300, Phvul.004G008400, Phvul.004G008700, Phvul.004G008800, Phvul.004G008900, Phvul.004G009300, Phvul.004G009800, Phvul.004G012800, Phvul.004G012900, Phvul.004G013000, Phvul.004G013100, Phvul.004G013300, Phvul.004G015700, Phvul.004G015800	Meziadi et al. 2016; Richard et al. 2018
Pl04G0000009800.v1	Pl04	766701	770081			x					Phvul.004G015800	Phvul.004G005600, Phvul.004G007900, Phvul.004G008000, Phvul.004G008100, Phvul.004G008300, Phvul.004G008400, Phvul.004G008700, Phvul.004G008800, Phvul.004G008900, Phvul.004G009300, Phvul.004G009800, Phvul.004G012800, Phvul.004G012900, Phvul.004G013000, Phvul.004G013100, Phvul.004G013300, Phvul.004G015700, Phvul.004G015800	Meziadi et al. 2016; Richard et al. 2018
Pl04G0000010000.v1	Pl04	797596	800964				x				Phvul.004G015800	Phvul.004G005600, Phvul.004G008300, Phvul.004G008900, Phvul.004G013000, Phvul.004G013100, Phvul.004G015800	Meziadi et al. 2016; Richard et al. 2018
Pl04G0000010900.v1	Pl04	870416	874011							x		Phvul.004G011000	Murube et al. 2019
Pl04G0000012800.v1	Pl04	1055012	1063181							x		Phvul.004G012600	Murube et al. 2019
Pl04G0000013000.v1	Pl04	1097319	1100639				x				Phvul.004G015800	Phvul.004G005600, Phvul.004G007700, Phvul.004G007900, Phvul.004G008300, Phvul.004G008800, Phvul.004G008900, Phvul.004G013000, Phvul.004G013100, Phvul.004G013300, Phvul.004G013800, Phvul.004G015800	Meziadi et al. 2016; Richard et al. 2018
Pl04G0000013100.v1	Pl04	1108592	1112119				x				Phvul.004G015800	Phvul.004G013800, Phvul.004G015800, Phvul.004G036200	Meziadi et al. 2016; Richard et al. 2018
Pl04G0000013200.v1	Pl04	1116318	1119764				x				Phvul.004G015800	Phvul.004G005600, Phvul.004G008300, Phvul.004G008900, Phvul.004G009300, Phvul.004G012900, Phvul.004G013000, Phvul.004G013100, Phvul.004G013300, Phvul.004G015800, Phvul.004G036600	Meziadi et al. 2016; Richard et al. 2018
Pl04G0000013300.v1	Pl04	1122329	1125780				x				Phvul.004G015800	Phvul.004G012900, Phvul.004G013000, Phvul.004G013100, Phvul.004G015800, Phvul.004G036600	Meziadi et al. 2016; Richard et al. 2018
Pl04G0000013400.v1	Pl04	1127465	1129263			x					Phvul.004G015800	Phvul.004G008300, Phvul.004G008400, Phvul.004G008800, Phvul.004G008900, Phvul.004G009300, Phvul.004G009800, Phvul.004G012800, Phvul.004G012900, Phvul.004G013000, Phvul.004G013200, Phvul.004G013300, Phvul.004G015700, Phvul.004G015800, Phvul.004G016000	Meziadi et al. 2016; Richard et al. 2018
Pl04G0000013500.v1	Pl04	1129538	1130539				x
Pl04G0000013600.v1	Pl04	1133948	1137325				x				Phvul.004G015800	Phvul.004G013000, Phvul.004G013100, Phvul.004G015800,	Meziadi et al. 2016; Richard et al. 2018
Pl04G0000013800.v1	Pl04	1149586	1150221			x					Phvul.004G015800	Phvul.004G005600, Phvul.004G007700, Phvul.004G007900, Phvul.004G008000, Phvul.004G008300, Phvul.004G008800, Phvul.004G008900, Phvul.004G009300, Phvul.004G009800, Phvul.004G012800, Phvul.004G012900, Phvul.004G013000, Phvul.004G013100, Phvul.004G013200, Phvul.004G013300, Phvul.004G015700, Phvul.004G015800, Phvul.004G016000, Phvul.004G036300, Phvul.004G036600, Phvul.004G036700	Meziadi et al. 2016; Richard et al. 2018
Pl04G0000013900.v1	Pl04	1151531	1152586				x				Phvul.004G015800	Phvul.004G015800	Meziadi et al. 2016; Richard et al. 2018
Pl04G0000014000.v1	Pl04	1156814	1167222			x					Phvul.004G015800	Phvul.004G015800, Phvul.004G036300	Meziadi et al. 2016; Richard et al. 2018
Pl04G0000014100.v1	Pl04	1180177	1183232				x				Phvul.004G015800	Phvul.004G008800, Phvul.004G008900, Phvul.004G012800, Phvul.004G012900, Phvul.004G013000, Phvul.004G013100, Phvul.004G013300, Phvul.004G015800, Phvul.004G036300, Phvul.004G036600, Phvul.004G036700	Meziadi et al. 2016; Richard et al. 2018
Pl04G0000014300.v1	Pl04	1199594	1201668			x					Phvul.004G015800	Phvul.004G005600, Phvul.004G007900, Phvul.004G008000, Phvul.004G008100, Phvul.004G008300, Phvul.004G008800, Phvul.004G008900, Phvul.004G009300, Phvul.004G009500, Phvul.004G009800, Phvul.004G012800, Phvul.004G012900, Phvul.004G013000, Phvul.004G013100, Phvul.004G013200, Phvul.004G013300, Phvul.004G015700, Phvul.004G015800, Phvul.004G016000, Phvul.004G036300, Phvul.004G036600, Phvul.004G036700	Meziadi et al. 2016; Richard et al. 2018
Pl04G0000014400.v1	Pl04	1201718	1203094				x				Phvul.004G015800	Phvul.004G008300, Phvul.004G008900, Phvul.004G012900, Phvul.004G013000, Phvul.004G013100, Phvul.004G013300, Phvul.004G015800, Phvul.004G036600	Meziadi et al. 2016; Richard et al. 2018
Pl04G0000014500.v1	Pl04	1208202	1211687			x					Phvul.004G015800	Phvul.004G012900, Phvul.004G013000, Phvul.004G013100, Phvul.004G013300, Phvul.004G015800, Phvul.004G036600	Meziadi et al. 2016; Richard et al. 2018
Pl04G0000014600.v1	Pl04	1215999	1219334			x					Phvul.004G015800	Phvul.004G008300, Phvul.004G008800, Phvul.004G008900, Phvul.004G013000, Phvul.004G013100, Phvul.004G013200, Phvul.004G013300, Phvul.004G015800, Phvul.004G036600, Phvul.004G036700	Meziadi et al. 2016; Richard et al. 2018
Pl04G0000016700.v1	Pl04	1361411	1364902			x					Phvul.004G015800	Phvul.004G015800	Meziadi et al. 2016; Richard et al. 2018
Pl04G0000017000.v1	Pl04	1379859	1383936							x	Phvul.004G016900	Phvul.004G016900	Murube et al. 2019
Pl04G0000024800.v1	Pl04	2086247	2088061				x				Phvul.004G023700	Phvul.004G023700
Pl04G0000027000.v1	Pl04	2294705	2300029							x	Phvul.004G026000	Phvul.004G026000
Pl04G0000028100.v1	Pl04	2392094	2394361							x	Phvul.004G027200	Phvul.004G027200
Pl04G0000028200.v1	Pl04	2401478	2403154							x
Pl04G0000028300.v1	Pl04	2406630	2411445							x	Phvul.004G027300	Phvul.004G027300
Pl04G0000028400.v1	Pl04	2420984	2422012							x
Pl04G0000028700.v1	Pl04	2435995	2437544							x	Phvul.004G027400	Phvul.004G027400
Pl04G0000028800.v1	Pl04	2451567	2454050						x		Phvul.004G027500	Phvul.004G027500
Pl04G0000030800.v1	Pl04	2785658	2789940		x	x	x				Phvul.004G028900	Phvul.004G028900	Meziadi et al. 2016; Richard et al. 2018
Pl04G0000036600.v1	Pl04	3458457	3463596							x	Phvul.004G032000	Phvul.004G032000
Pl04G0000041100.v1	Pl04	3820244	3835822				x				Phvul.004G037600	Phvul.004G037500	Schmutz et al. 2014
Pl04G0000042600.v1	Pl04	4002646	4146657							x	Phvul.004G038800	Phvul.004G038800
Pl04G0000042900.v1	Pl04	4057187	4058197							x	Phvul.004G039100	Phvul.004G039100
Pl04G0000043200.v1	Pl04	4079944	4082340							x	Phvul.004G039500	Phvul.004G039500
Pl04G0000043300.v1	Pl04	4117101	4119566							x	Phvul.004G039400	Phvul.004G039400
Pl04G0000043400.v1	Pl04	4149339	4151753							x	Phvul.004G039800	Phvul.004G039800
Pl04G0000043500.v1	Pl04	4156613	4159072							x	Phvul.004G040000	Phvul.004G039200, Phvul.004G040000
Pl04G0000044300.v1	Pl04	4212102	4213922							x	Phvul.004G040300	Phvul.004G040300
Pl04G0000046600.v1	Pl04	4494055	4497771							x	Phvul.004G043800	Phvul.004G043800, Phvul.004G044200
Pl04G0000047500.v1	Pl04	4552770	4555970				x				Phvul.004G044800	Phvul.004G044800
Pl04G0000047600.v1	Pl04	4560853	4563696				x				Phvul.004G044800	Phvul.004G044800
Pl04G0000049600.v1	Pl04	4809033	4813668				x				Phvul.004G046800	Phvul.004G046800
Pl04G0000051000.v1	Pl04	4937264	4938254			x					Phvul.004G048000	Phvul.004G048000
Pl04G0000051100.v1	Pl04	4942183	4948122				x				Phvul.004G048000	Phvul.004G048000	Meziadi et al. 2016; Richard et al. 2018
Pl04G0000055700.v1	Pl04	5427191	5429010							x
Pl04G0000056000.v1	Pl04	5456039	5457376							x
Pl04G0000056700.v1	Pl04	5539770	5543471							x
Pl04G0000062500.v1	Pl04	6190029	6195670				x				Phvul.004G055400	Phvul.004G055400
Pl04G0000065700.v1	Pl04	6620597	6623833		x	x					Phvul.004G058700	Phvul.004G058700	Meziadi et al. 2016; Richard et al. 2018
Pl04G0000081800.v1	Pl04	8803764	8815901				x				Phvul.004G072600	Phvul.004G072600
Pl04G0000090000.v1	Pl04	9924319	9927720			x
Pl04G0000102100.v1	Pl04	11521742	11578138				x				Phvul.004G084100	Phvul.010G033800
Pl04G0000102200.v1	Pl04	11525612	11525944				x				Phvul.004G084200	Phvul.004G084200
Pl04G0000103100.v1	Pl04	11671041	11676508				x				Phvul.004G084600	Phvul.004G084600
Pl04G0000103800.v1	Pl04	11749875	11751107				x				Phvul.004G084600	Phvul.004G084600
Pl04G0000103900.v1	Pl04	11752096	11753374				x
Pl04G0000105000.v1	Pl04	11906887	11907982				x
Pl04G0000105700.v1	Pl04	12080557	12084006				x
Pl04G0000117700.v1	Pl04	14069607	14072027							x	Phvul.004G085800	Phvul.004G085800
Pl04G0000118600.v1	Pl04	14210785	14219300				x				Phvul.004G086300	Phvul.004G086300, Phvul.007G086800
Pl04G0000180300.v1	Pl04	23993823	23995827				x
Pl04G0000184600.v1	Pl04	24656205	24659081		x		x
Pl04G0000186100.v1	Pl04	24924024	24926135		x	x
Pl04G0000194700.v1	Pl04	26312697	26313905				x
Pl04G0000252200.v1	Pl04	35481487	35484345				x				Phvul.004G096200	Phvul.004G096200
Pl04G0000252700.v1	Pl04	35537409	35539579				x
Pl04G0000253100.v1	Pl04	35600172	35603591				x				Phvul.004G096200	Phvul.004G096200
Pl04G0000254100.v1	Pl04	35705820	35709206				x				Phvul.004G096200	Phvul.004G096200, Phvul.004G096400
Pl04G0000260900.v1	Pl04	36665306	36668838				x				Phvul.004G099100	Phvul.004G099100
Pl04G0000261600.v1	Pl04	36728331	36731480				x				Phvul.004G099100	Phvul.004G099100
Pl04G0000262900.v1	Pl04	36885754	36887075				x				Phvul.004G099500	Phvul.004G099100, Phvul.004G099500
Pl04G0000263300.v1	Pl04	36925296	36928276				x				Phvul.004G099500	Phvul.004G099100, Phvul.004G099300, Phvul.004G099500, Phvul.004G099700
Pl04G0000263500.v1	Pl04	36966167	36969494				x				Phvul.004G099500	Phvul.004G099100, Phvul.004G099300, Phvul.004G099500
Pl04G0000263700.v1	Pl04	37027641	37029616				x				Phvul.004G099700	Phvul.004G099100, Phvul.004G099400, Phvul.004G099500, Phvul.004G099700
Pl04G0000263800.v1	Pl04	37032836	37035693				x				Phvul.004G099700	Phvul.004G099700
Pl04G0000265500.v1	Pl04	37262931	37266221				x				Phvul.004G099900	Phvul.004G099100, Phvul.004G099300, Phvul.004G099400, Phvul.004G099500, Phvul.004G099700, Phvul.004G099900, Phvul.004G100000, Phvul.004G100100
Pl04G0000266500.v1	Pl04	37339021	37339766				x				Phvul.004G099900	Phvul.004G099900, Phvul.004G100000, Phvul.004G100100
Pl04G0000266600.v1	Pl04	37343159	37345464				x				Phvul.004G099900	Phvul.004G099900
Pl04G0000266900.v1	Pl04	37366956	37369849				x					Phvul.004G100000
Pl04G0000267400.v1	Pl04	37427104	37430973				x				Phvul.004G099900	Phvul.004G099900, Phvul.004G100100
Pl04G0000267500.v1	Pl04	37446097	37449783				x
Pl04G0000267900.v1	Pl04	37496968	37497517				x				Phvul.004G100000	Phvul.004G099900, Phvul.004G100000, Phvul.004G100100
Pl04G0000268000.v1	Pl04	37498280	37500061				x				Phvul.004G100000	Phvul.004G100000
Pl04G0000268300.v1	Pl04	37518067	37519122				x				Phvul.004G100100	Phvul.004G099900, Phvul.004G100000, Phvul.004G100100
Pl04G0000268400.v1	Pl04	37519924	37521480				x				Phvul.004G100100	Phvul.004G100100
Pl04G0000268600.v1	Pl04	37559593	37562718				x				Phvul.004G100200	Phvul.004G100200
Pl04G0000279500.v1	Pl04	39278766	39280410				x
Pl04G0000280200.v1	Pl04	39415368	39416936				x				Phvul.004G103300	Phvul.004G103000, Phvul.004G103300, Phvul.004G103600, Phvul.004G103700
Pl04G0000280800.v1	Pl04	39491131	39492090				x				Phvul.004G103300	Phvul.004G103000, Phvul.004G103300, Phvul.004G103600, Phvul.004G103700, Phvul.004G103800
Pl04G0000280900.v1	Pl04	39493889	39497247				x
Pl04G0000281000.v1	Pl04	39517870	39519069				x				Phvul.004G103300	Phvul.004G103000, Phvul.004G103300, Phvul.004G103600, Phvul.004G103700, Phvul.004G103800
Pl04G0000281100.v1	Pl04	39520391	39524829				x				Phvul.004G103700	Phvul.004G103300, Phvul.004G103700
Pl04G0000281800.v1	Pl04	39614151	39615273				x				Phvul.004G103700	Phvul.004G103000, Phvul.004G103300, Phvul.004G103600, Phvul.004G103700
Pl04G0000284200.v1	Pl04	39952223	39953328				x
Pl04G0000284300.v1	Pl04	39963038	39963412				x
Pl04G0000284600.v1	Pl04	40022084	40025902				x				Phvul.004G104900	Phvul.004G104700, Phvul.004G104900
Pl04G0000284900.v1	Pl04	40080513	40080931							x
Pl04G0000286000.v1	Pl04	40162594	40166389				x				Phvul.004G105100	Phvul.004G105100, Phvul.004G105400
Pl04G0000286500.v1	Pl04	40225479	40229595				x				Phvul.004G105400	Phvul.004G105100, Phvul.004G105400
Pl04G0000286800.v1	Pl04	40256228	40257310				x				Phvul.004G105400	Phvul.004G105100, Phvul.004G105400
Pl04G0000287000.v1	Pl04	40280424	40284418				x
Pl04G0000287100.v1	Pl04	40320279	40324938				x
Pl04G0000287500.v1	Pl04	40414478	40415868					x			Phvul.004G105800	Phvul.004G105800
Pl04G0000288400.v1	Pl04	40508840	40510070				x				Phvul.004G106500	Phvul.004G106500
Pl04G0000291500.v1	Pl04	40786168	40789476				x
Pl04G0000296400.v1	Pl04	41410243	41413150							x	Phvul.004G109500	Phvul.004G109500
Pl04G0000302100.v1	Pl04	42430264	42433707				x				Phvul.004G114700	Phvul.004G114700, Phvul.004G115300, Phvul.004G115400, Phvul.004G116600
Pl04G0000302300.v1	Pl04	42473468	42475330				x				Phvul.004G115400	Phvul.004G114700, Phvul.004G115300, Phvul.004G115400, Phvul.004G116600
Pl04G0000302400.v1	Pl04	42491613	42492744				x				Phvul.004G115500	Phvul.004G115500
Pl04G0000302500.v1	Pl04	42502308	42508343				x				Phvul.004G115600	Phvul.004G115600
Pl04G0000302800.v1	Pl04	42554189	42555480				x					Phvul.004G114700, Phvul.004G115300, Phvul.004G115400
Pl04G0000302900.v1	Pl04	42556740	42557557				x					Phvul.004G114700, Phvul.004G115300, Phvul.004G115400, Phvul.004G116600
Pl04G0000303200.v1	Pl04	42584953	42586359				x				Phvul.004G115600	Phvul.004G115600
Pl04G0000303300.v1	Pl04	42592384	42596616				x				Phvul.004G115700	Phvul.004G115700
Pl04G0000304500.v1	Pl04	42745166	42748675				x				Phvul.004G116600	Phvul.004G116600
Pl04G0000306500.v1	Pl04	42919209	42920469				x				Phvul.004G117700	Phvul.004G117700	Schmutz et al. 2014
Pl04G0000307900.v1	Pl04	43037814	43039538				x				Phvul.004G118500	Phvul.004G118500
Pl04G0000310700.v1	Pl04	43340116	43343415						x		Phvul.004G120500	Phvul.004G120500
Pl04G0000316000.v1	Pl04	44037720	44039666							x	Phvul.004G124100	Phvul.004G124100
Pl04G0000316800.v1	Pl04	44099132	44102090							x	Phvul.004G124400	Phvul.004G124400
Pl04G0000317400.v1	Pl04	44145665	44146763							x	Phvul.004G125100	Phvul.004G125100
Pl04G0000317500.v1	Pl04	44151762	44153301							x	Phvul.004G125100	Phvul.004G125100
Pl04G0000317900.v1	Pl04	44171191	44172735							x	Phvul.004G125100	Phvul.004G124900, Phvul.004G125100
Pl04G0000318200.v1	Pl04	44202058	44205556							x	Phvul.004G125200	Phvul.004G125200
Pl04G0000319000.v1	Pl04	44261370	44269012				x				Phvul.004G126100	Phvul.004G126100
Pl04G0000320700.v1	Pl04	44489940	44494225				x				Phvul.004G128100	Phvul.004G128100
Pl04G0000327300.v1	Pl04	45142262	45144792				x				Phvul.004G134300	Phvul.004G134300
Pl04G0000329100.v1	Pl04	45317011	45319156				x				Phvul.004G136100	Phvul.004G136100
Pl04G0000329500.v1	Pl04	45353610	45357388				x				Phvul.004G136500	Phvul.004G136500
Pl04G0000330100.v1	Pl04	45411296	45417207		x	x	x				Phvul.004G137300	Phvul.004G137300	Meziadi et al. 2016; Richard et al. 2018
Pl04G0000332400.v1	Pl04	45628698	45632764			x					Phvul.004G139800	Phvul.004G139700, Phvul.004G139800, Phvul.004G139900, Phvul.004G140100, Phvul.004G140800
Pl04G0000332700.v1	Pl04	45662039	45664167		x						Phvul.004G140400	Phvul.004G140400
Pl04G0000332800.v1	Pl04	45671303	45673349		x	x					Phvul.004G140500	Phvul.004G140500
Pl04G0000333200.v1	Pl04	45692694	45695217		x	x						Phvul.004G140400	Meziadi et al. 2016; Richard et al. 2018
Pl04G0000333400.v1	Pl04	45697522	45705069		x	x					Phvul.004G140500	Phvul.004G140500	Meziadi et al. 2016; Richard et al. 2018
Pl04G0000335900.v1	Pl04	45945866	45950036						x		Phvul.004G143500	Phvul.004G143500
Pl04G0000337700.v1	Pl04	46155792	46163113							x	Phvul.004G145100	Phvul.004G145100
Pl04G0000337900.v1	Pl04	46182879	46185802				x				Phvul.004G145300	Phvul.004G145300
Pl04G0000342000.v1	Pl04	46607527	46610069				x				Phvul.004G149100	Phvul.004G149100
Pl04G0000342100.v1	Pl04	46613310	46627448							x	Phvul.004G149200	Phvul.004G149200
Pl04G0000344700.v1	Pl04	46895326	46903800							x	Phvul.004G151400	Phvul.004G151400
Pl04G0000348900.v1	Pl04	47296821	47299542							x	Phvul.004G154500	Phvul.004G154500
Pl04G0000349000.v1	Pl04	47304949	47307208							x	Phvul.004G154600	Phvul.004G154600
Pl04G0000349100.v1	Pl04	47318426	47321949							x	Phvul.004G154800	Phvul.004G154800
Pl04G0000349200.v1	Pl04	47323358	47324104							x		Phvul.004G154700
Pl04G0000349300.v1	Pl04	47326613	47327530							x	Phvul.004G154800	Phvul.004G154800
Pl04G0000349400.v1	Pl04	47329368	47336148							x	Phvul.004G154800	Phvul.004G154800
Pl04G0000349500.v1	Pl04	47339202	47340101							x	Phvul.004G155100	Phvul.004G155100
Pl04G0000350300.v1	Pl04	47400523	47401434							x	Phvul.004G155100	Phvul.004G155100
Pl04G0000350500.v1	Pl04	47415753	47416664							x	Phvul.004G155400	Phvul.004G155400
Pl04G0000350700.v1	Pl04	47423948	47424859							x
Pl04G0000350900.v1	Pl04	47435095	47441352							x	Phvul.004G155600	Phvul.004G155600
Pl04G0000351200.v1	Pl04	47454435	47455325							x	Phvul.004G155800	Phvul.004G155800
Pl04G0000351300.v1	Pl04	47458728	47459531							x
Pl04G0000352200.v1	Pl04	47531003	47534898							x		Phvul.003G094400
Pl04G0000358700.v1	Pl04	48062028	48064049				x				Phvul.004G161500	Phvul.004G097800, Phvul.004G098000, Phvul.004G098300, Phvul.004G161500
Pl04G0000361600.v1	Pl04	48351063	48355571							x	Phvul.004G164000	Phvul.004G164000
Pl04G0000369200.v1	Pl04	48967715	48971965				x				Phvul.004G175900	Phvul.004G175900
Pl04G0000369300.v1	Pl04	48976236	48980083				x				Phvul.004G175800	Phvul.004G175800	Schmutz et al. 2014
Pl04G0000369400.v1	Pl04	48981944	48985733				x				Phvul.004G175700	Phvul.004G175700
Pl04G0000370000.v1	Pl04	49042451	49052554							x	Phvul.004G175100	Phvul.004G175100
Pl04G0000371100.v1	Pl04	49131578	49133622				x				Phvul.004G174100	Phvul.004G174100
Pl04G0000371900.v1	Pl04	49200399	49205475				x				Phvul.004G173300	Phvul.004G173300
Pl04G0000375300.v1	Pl04	49365712	49368824							x	Phvul.004G177800	Phvul.004G177800
Pl04G0000375400.v1	Pl04	49370449	49373160				x				Phvul.004G177900	Phvul.004G177900
Pl04G0000376200.v1	Pl04	49427068	49428869							x	Phvul.004G178600	Phvul.004G178600
Pl04G0000376300.v1	Pl04	49430006	49430920							x	Phvul.004G178600	Phvul.004G178600
Pl05G0000003600.v1	Pl05	249657	253942							x	Phvul.005G003300	Phvul.005G003300
Pl05G0000005800.v1	Pl05	428891	432427					x			Phvul.005G005800	Phvul.005G005800
Pl05G0000005900.v1	Pl05	440312	445078				x				Phvul.005G005900	Phvul.005G005900	Schmutz et al. 2014
Pl05G0000007800.v1	Pl05	563708	565162				x				Phvul.005G007100	Phvul.005G007100
Pl05G0000007900.v1	Pl05	568946	571936				x				Phvul.005G007200	Phvul.005G007200
Pl05G0000009500.v1	Pl05	685953	688473				x				Phvul.005G008500	Phvul.005G008500
Pl05G0000009900.v1	Pl05	709655	718228							x	Phvul.005G008900	Phvul.005G008900
Pl05G0000012400.v1	Pl05	882133	882351							x
Pl05G0000013000.v1	Pl05	912707	916263							x	Phvul.005G011200	Phvul.005G011200
Pl05G0000014900.v1	Pl05	1045029	1048368							x	Phvul.005G013100	Phvul.005G013100
Pl05G0000015000.v1	Pl05	1050939	1055788							x	Phvul.005G013200	Phvul.005G013200
Pl05G0000015700.v1	Pl05	1107937	1112392							x	Phvul.005G015100	Phvul.005G015100
Pl05G0000015900.v1	Pl05	1122015	1125762							x	Phvul.005G014900	Phvul.005G014900
Pl05G0000016100.v1	Pl05	1129894	1134050							x	Phvul.005G014900	Phvul.005G014900
Pl05G0000017200.v1	Pl05	1200779	1203952				x				Phvul.005G016500	Phvul.005G016500	Meziadi et al. 2016; Richard et al. 2018
Pl05G0000018100.v1	Pl05	1285931	1289995			x					Phvul.005G014200	Phvul.005G014200	Meziadi et al. 2016; Richard et al. 2018
Pl05G0000025700.v1	Pl05	2097401	2097833							x
Pl05G0000033200.v1	Pl05	2704695	2709105							x	Phvul.005G030900	Phvul.005G030900
Pl05G0000033700.v1	Pl05	2724508	2728014			x					Phvul.005G031200	Phvul.005G031200	Meziadi et al. 2016; Richard et al. 2018
Pl05G0000037200.v1	Pl05	2974074	2975641						x		Phvul.005G034400	Phvul.005G034400
Pl05G0000039400.v1	Pl05	3177757	3179250				x				Phvul.005G036600	Phvul.005G036600
Pl05G0000041800.v1	Pl05	3362856	3365463				x
Pl05G0000042900.v1	Pl05	3452669	3457394		x	x	x
Pl05G0000043900.v1	Pl05	3538551	3539489							x	Phvul.005G038600	Phvul.005G038600
Pl05G0000044900.v1	Pl05	3626431	3629728							x		Phvul.005G063700
Pl05G0000046000.v1	Pl05	3754397	3757197						x		Phvul.005G040000	Phvul.005G040000
Pl05G0000050100.v1	Pl05	4199836	4201896							x	Phvul.005G043800	Phvul.005G043800
Pl05G0000058700.v1	Pl05	5258771	5267954							x	Phvul.005G050200	Phvul.005G050200
Pl05G0000058800.v1	Pl05	5270468	5278036							x	Phvul.005G050300	Phvul.005G050300	Schmutz et al. 2014
Pl05G0000059700.v1	Pl05	5361559	5362378							x	Phvul.005G051000	Phvul.005G051000
Pl05G0000064500.v1	Pl05	5931188	5935223				x				Phvul.005G054300	Phvul.005G054300	Schmutz et al. 2014
Pl05G0000064600.v1	Pl05	5955764	5956690							x	Phvul.005G054400	Phvul.005G054400	Schmutz et al. 2014
Pl05G0000065400.v1	Pl05	6063848	6068226							x	Phvul.005G055000	Phvul.005G055000
Pl05G0000074700.v1	Pl05	7276685	7282031			x					Phvul.005G062300	Phvul.005G062300
Pl05G0000077600.v1	Pl05	7639104	7642287							x	Phvul.005G064700	Phvul.005G064700
Pl05G0000089600.v1	Pl05	9197680	9201805				x				Phvul.005G073800	Phvul.005G073800
Pl05G0000092800.v1	Pl05	9717574	9723730							x	Phvul.005G071900	Phvul.005G071900
Pl05G0000104100.v1	Pl05	11437829	11452077				x
Pl05G0000105500.v1	Pl05	11815094	11826442				x					Phvul.005G077400, Phvul.005G077600, Phvul.005G077900
Pl05G0000105700.v1	Pl05	11840593	11842290				x
Pl05G0000106700.v1	Pl05	12105810	12144068							x		Phvul.005G077600, Phvul.005G077700, Phvul.005G077900
Pl05G0000108100.v1	Pl05	12419592	12445514				x					Phvul.005G078100
Pl05G0000108800.v1	Pl05	12536782	12546720				x					Phvul.005G078400
Pl05G0000108900.v1	Pl05	12552050	12552517				x
Pl05G0000109500.v1	Pl05	12704531	12713928				x					Phvul.005G078500
Pl05G0000119600.v1	Pl05	15301735	15303853							x		Phvul.005G078800, Phvul.005G078900
Pl05G0000119700.v1	Pl05	15307656	15308529				x
Pl05G0000120000.v1	Pl05	15332521	15333722				x
Pl05G0000120900.v1	Pl05	15532753	15537670							x
Pl05G0000121100.v1	Pl05	15564495	15565967				x
Pl05G0000122900.v1	Pl05	15801103	15811917				x				Phvul.005G079100	Phvul.005G079100
Pl05G0000149500.v1	Pl05	21423470	21431610				x					Phvul.005G083000
Pl05G0000156700.v1	Pl05	23144919	23146785					x			Phvul.005G080200	Phvul.005G080200
Pl05G0000159500.v1	Pl05	23688799	23691209					x			Phvul.005G080400	Phvul.005G080400
Pl05G0000162100.v1	Pl05	23842144	23844694					x				Phvul.005G080300
Pl05G0000164600.v1	Pl05	24282848	24283987		x						Phvul.005G084100	Phvul.005G084100
Pl05G0000168700.v1	Pl05	24856196	24859169							x	Phvul.005G085600	Phvul.005G085600
Pl05G0000168900.v1	Pl05	24916266	24917333							x
Pl05G0000172700.v1	Pl05	25410404	25413385			x	x				Phvul.005G087100	Phvul.005G087100	Meziadi et al. 2016; Richard et al. 2018
Pl05G0000174600.v1	Pl05	25788844	25792265							x	Phvul.005G088000	Phvul.005G088000
Pl05G0000174700.v1	Pl05	25793597	25797602							x	Phvul.005G088100	Phvul.005G088100
Pl05G0000175400.v1	Pl05	25841650	25845952							x	Phvul.005G088200	Phvul.005G088200
Pl05G0000175600.v1	Pl05	25866254	25870243							x	Phvul.005G088700	Phvul.005G088700
Pl05G0000175800.v1	Pl05	25882500	25886863							x	Phvul.005G088800	Phvul.005G088800
Pl05G0000181500.v1	Pl05	26872591	26875682							x	Phvul.005G090000	Phvul.005G090000
Pl05G0000187400.v1	Pl05	27626089	27628177						x		Phvul.005G093200	Phvul.005G093200
Pl05G0000188700.v1	Pl05	27716834	27721657		x	x	x
Pl05G0000189200.v1	Pl05	27759603	27760672				x
Pl05G0000191200.v1	Pl05	28002163	28006872		x	x	x
Pl05G0000191500.v1	Pl05	28064730	28067639				x					Phvul.008G146600
Pl05G0000193900.v1	Pl05	28298111	28300630					x			Phvul.005G093800	Phvul.005G093800
Pl05G0000194500.v1	Pl05	28381182	28385806							x	Phvul.005G094100	Phvul.005G094100
Pl05G0000194900.v1	Pl05	28407167	28411604							x	Phvul.005G094300	Phvul.005G094300
Pl05G0000196900.v1	Pl05	28566311	28587874							x	Phvul.005G094900	Phvul.005G094900
Pl05G0000205100.v1	Pl05	29425548	29428687				x				Phvul.005G100400	Phvul.005G100400
Pl05G0000207900.v1	Pl05	29789485	29792586							x	Phvul.005G103200	Phvul.005G103200	Schmutz et al. 2014
Pl05G0000208000.v1	Pl05	29793287	29795353							x	Phvul.005G103300	Phvul.005G103300
Pl05G0000212300.v1	Pl05	30177375	30184134				x				Phvul.005G106800	Phvul.005G106800
Pl05G0000217000.v1	Pl05	30722187	30724831							x	Phvul.005G110300	Phvul.005G110300
Pl05G0000217100.v1	Pl05	30730058	30733121							x	Phvul.005G110400	Phvul.005G110400
Pl05G0000217500.v1	Pl05	30770718	30788432							x	Phvul.005G110900	Phvul.005G110900
Pl05G0000217600.v1	Pl05	30801472	30805752							x	Phvul.005G110900	Phvul.005G110900
Pl05G0000223100.v1	Pl05	31335982	31341535						x		Phvul.005G114600	Phvul.005G114600, Phvul.011G104700
Pl05G0000224900.v1	Pl05	31605251	31607652	x							Phvul.005G115700	Phvul.005G115700
Pl05G0000225300.v1	Pl05	31629579	31632861					x			Phvul.005G116000	Phvul.005G116000
Pl05G0000227400.v1	Pl05	31883360	31886232							x	Phvul.005G118000	Phvul.005G118000	Schmutz et al. 2014
Pl05G0000229500.v1	Pl05	32136988	32141239				x				Phvul.005G120300	Phvul.005G120300
Pl05G0000229900.v1	Pl05	32163455	32171487							x	Phvul.005G120700	Phvul.005G120700	Schmutz et al. 2014
Pl05G0000231100.v1	Pl05	32327397	32331240				x				Phvul.005G122000	Phvul.005G122000
Pl05G0000239200.v1	Pl05	33008717	33014163							x	Phvul.005G128900	Phvul.005G128900
Pl05G0000242400.v1	Pl05	33466434	33468785							x	Phvul.005G132600	Phvul.005G132600
Pl05G0000245600.v1	Pl05	33859164	33861388							x	Phvul.005G135500	Phvul.005G135500
Pl05G0000249600.v1	Pl05	34292954	34296188							x	Phvul.005G138700	Phvul.005G138700
Pl05G0000250600.v1	Pl05	34384959	34387478							x	Phvul.005G139800	Phvul.005G139800
Pl05G0000255700.v1	Pl05	34797318	34801922							x	Phvul.005G143600	Phvul.005G143600
Pl05G0000256300.v1	Pl05	34845439	34849126							x	Phvul.005G144200	Phvul.005G144200
Pl05G0000261400.v1	Pl05	35217848	35219679							x	Phvul.005G148800	Phvul.005G148800
Pl05G0000261600.v1	Pl05	35244582	35246758				x				Phvul.005G149200	Phvul.005G149200
Pl05G0000267100.v1	Pl05	35702351	35706006							x	Phvul.005G153100	Phvul.005G153100
Pl05G0000270500.v1	Pl05	35963891	35966692							x	Phvul.005G156500	Phvul.005G156500
Pl05G0000273100.v1	Pl05	36154932	36156673							x	Phvul.005G158900	Phvul.005G158900
Pl05G0000273500.v1	Pl05	36177523	36183042							x	Phvul.005G159200	Phvul.005G159200
Pl05G0000274900.v1	Pl05	36273527	36282637							x	Phvul.005G160700	Phvul.005G160600, Phvul.005G160700
Pl05G0000276200.v1	Pl05	36388358	36398008				x				Phvul.005G162100	Phvul.005G162000, Phvul.005G162100
Pl05G0000276300.v1	Pl05	36399642	36403886				x				Phvul.005G162500	Phvul.005G162500
Pl05G0000276400.v1	Pl05	36406253	36410436				x				Phvul.005G162500	Phvul.005G162500
Pl05G0000276600.v1	Pl05	36419819	36424048				x				Phvul.005G163100	Phvul.005G163100
Pl05G0000276700.v1	Pl05	36426681	36430880				x				Phvul.005G163400	Phvul.005G163400
Pl05G0000276900.v1	Pl05	36435177	36437203				x				Phvul.005G163900	Phvul.005G163900
Pl05G0000277000.v1	Pl05	36440411	36446139							x	Phvul.005G162600	Phvul.005G162600
Pl05G0000277100.v1	Pl05	36448309	36453602				x				Phvul.005G164500	Phvul.005G164500
Pl05G0000277200.v1	Pl05	36458855	36463113				x				Phvul.005G164700	Phvul.005G164700
Pl05G0000278600.v1	Pl05	36556631	36561176							x	Phvul.005G165900	Phvul.005G165900
Pl05G0000279600.v1	Pl05	36651952	36659288						x		Phvul.005G166900	Phvul.005G166900, Phvul.010G146200
Pl05G0000281900.v1	Pl05	36811993	36818074						x		Phvul.005G168900	Phvul.005G168900
Pl05G0000283000.v1	Pl05	36872113	36876201							x	Phvul.005G167700	Phvul.005G167700
Pl05G0000291500.v1	Pl05	37498007	37500787							x	Phvul.005G177900	Phvul.005G177900
Pl05G0000292000.v1	Pl05	37526586	37528675				x				Phvul.005G178400	Phvul.005G178400
Pl05G0000292100.v1	Pl05	37532888	37536044							x	Phvul.005G178500	Phvul.005G178500
Pl05G0000294700.v1	Pl05	37701586	37704651							x	Phvul.005G181000	Phvul.005G181000
Pl05G0000294900.v1	Pl05	37718429	37719832				x				Phvul.005G181200	Phvul.005G181200
Pl05G0000295500.v1	Pl05	37756264	37758583					x			Phvul.005G181800	Phvul.005G181800	Schmutz et al. 2014
Pl05G0000295600.v1	Pl05	37773398	37775434							x	Phvul.005G181900	Phvul.005G181900
Pl05G0000296700.v1	Pl05	37845989	37848127							x	Phvul.005G182900	Phvul.005G182900
Pl05G0000297100.v1	Pl05	37867723	37870965				x				Phvul.005G183300	Phvul.005G183300
Pl05G0000298700.v1	Pl05	37942821	37946929				x				Phvul.005G184700	Phvul.005G184700
Pl05G0000299500.v1	Pl05	38000469	38003220				x				Phvul.005G185800	Phvul.005G185800	Schmutz et al. 2014
Pl05G0000299600.v1	Pl05	38006251	38010163							x
Pl06G0000002200.v1	Pl06	305638	324292							x		Phvul.004G089800, Phvul.004G089900
Pl06G0000002500.v1	Pl06	360627	364460							x		Phvul.006G000200
Pl06G0000005500.v1	Pl06	652300	654888				x				Phvul.006G001500
Pl06G0000009400.v1	Pl06	1271068	1273550				x				Phvul.006G003400	Phvul.006G003400	Schmutz et al. 2014
Pl06G0000010200.v1	Pl06	1320902	1322131				x				Phvul.006G003600	Phvul.006G003600
Pl06G0000021400.v1	Pl06	2805229	2807407						x			Phvul.006G013200
Pl06G0000022500.v1	Pl06	2929609	2935839							x		Phvul.006G006700
Pl06G0000023800.v1	Pl06	3166160	3168889							x
Pl06G0000078700.v1	Pl06	11747332	11749818			x	x				Phvul.006G010000	Phvul.006G010000	Richard et al. 2018
Pl06G0000104000.v1	Pl06	15078397	15082301			x					Phvul.006G018700	Phvul.006G018700	Richard et al. 2018; Schmutz et al. 2014
Pl06G0000105400.v1	Pl06	15299982	15313731							x	Phvul.006G019900	Phvul.006G019900	Schmutz et al. 2014
Pl06G0000108000.v1	Pl06	15662939	15666661							x	Phvul.006G020700	Phvul.006G020700
Pl06G0000108100.v1	Pl06	15676052	15678638							x	Phvul.006G020900	Phvul.006G020900
Pl06G0000113400.v1	Pl06	16279403	16279735							x
Pl06G0000120400.v1	Pl06	17189994	17195106				x				Phvul.006G029000	Phvul.006G029000
Pl06G0000128600.v1	Pl06	18117346	18120868							x	Phvul.006G032300	Phvul.006G032300
Pl06G0000129600.v1	Pl06	18277908	18278779							x	Phvul.006G033200	Phvul.006G033200
Pl06G0000129700.v1	Pl06	18284627	18286729							x	Phvul.006G033300	Phvul.006G033300
Pl06G0000129800.v1	Pl06	18295483	18304927							x	Phvul.006G033300	Phvul.006G033300
Pl06G0000137500.v1	Pl06	19241842	19243488				x				Phvul.006G039000	Phvul.006G039000
Pl06G0000137700.v1	Pl06	19255109	19256754				x				Phvul.006G039000	Phvul.006G039000
Pl06G0000138100.v1	Pl06	19303146	19305368							x	Phvul.006G039500	Phvul.006G039500
Pl06G0000141700.v1	Pl06	19615101	19616732				x				Phvul.006G040900	Phvul.006G040900	Meziadi et al. 2016; Richard et al. 2018
Pl06G0000142000.v1	Pl06	19631058	19638114				x				Phvul.006G041200	Phvul.006G041200
Pl06G0000142300.v1	Pl06	19682111	19685518			x					Phvul.006G041400	Phvul.006G041400
Pl06G0000142800.v1	Pl06	19724706	19725686				x
Pl06G0000143200.v1	Pl06	19740270	19744023				x
Pl06G0000145300.v1	Pl06	19896526	19904967				x					Phvul.006G041200
Pl06G0000151300.v1	Pl06	20462833	20467071					x			Phvul.006G047300	Phvul.006G047300
Pl06G0000156400.v1	Pl06	20966476	20967453				x				Phvul.006G052300	Phvul.006G052300
Pl06G0000156500.v1	Pl06	20968038	20969294			x					Phvul.006G052300	Phvul.006G052300
Pl06G0000156600.v1	Pl06	20977884	20978861				x				Phvul.006G052300	Phvul.006G052300
Pl06G0000156700.v1	Pl06	20979446	20980701			x					Phvul.006G052300	Phvul.006G052300
Pl06G0000157000.v1	Pl06	21002588	21005042			x					Phvul.006G052300	Phvul.006G052300
Pl06G0000157400.v1	Pl06	21013965	21016625			x					Phvul.006G052500	Phvul.006G052500
Pl06G0000157800.v1	Pl06	21052411	21055062			x					Phvul.006G052500	Phvul.006G052500
Pl06G0000158400.v1	Pl06	21077689	21080887			x						Phvul.006G052400
Pl06G0000158500.v1	Pl06	21086528	21087894				x				Phvul.006G052500	Phvul.006G052500
Pl06G0000158600.v1	Pl06	21098504	21099147			x
Pl06G0000159000.v1	Pl06	21132826	21135513			x					Phvul.006G052500	Phvul.006G052500
Pl06G0000159400.v1	Pl06	21180582	21185309				x				Phvul.006G052900	Phvul.006G052900
Pl06G0000159600.v1	Pl06	21221940	21224586							x	Phvul.006G053100	Phvul.006G053100
Pl06G0000159800.v1	Pl06	21251892	21256881					x			Phvul.006G053300	Phvul.006G053300
Pl06G0000163600.v1	Pl06	21575157	21582753			x					Phvul.006G056500	Phvul.006G056500
Pl06G0000165000.v1	Pl06	21725865	21727748							x	Phvul.006G057900	Phvul.006G057900
Pl06G0000166600.v1	Pl06	21854802	21857218	x								Phvul.008G085100
Pl06G0000167800.v1	Pl06	21952569	21957176				x					Phvul.008G086400
Pl06G0000177100.v1	Pl06	22935521	22939439							x	Phvul.006G066500	Phvul.006G066500
Pl06G0000177600.v1	Pl06	22983305	22986928			x					Phvul.006G066800	Phvul.006G066800
Pl06G0000179100.v1	Pl06	23103681	23107028							x	Phvul.006G068400	Phvul.006G068400
Pl06G0000182200.v1	Pl06	23523350	23527117						x		Phvul.006G071300	Phvul.006G071300
Pl06G0000182500.v1	Pl06	23556209	23558631							x	Phvul.006G071600	Phvul.006G071600
Pl06G0000182900.v1	Pl06	23604615	23610045				x				Phvul.006G072100	Phvul.006G072100
Pl06G0000183100.v1	Pl06	23622331	23626515							x	Phvul.006G072300	Phvul.006G072300
Pl06G0000186400.v1	Pl06	23899119	23902581					x			Phvul.006G074600	Phvul.006G074600
Pl06G0000188400.v1	Pl06	24045876	24047908							x	Phvul.006G076200	Phvul.006G076200	Schmutz et al. 2014
Pl06G0000188800.v1	Pl06	24067331	24070200							x	Phvul.006G076600	Phvul.006G076600
Pl06G0000189300.v1	Pl06	24104730	24110156							x	Phvul.006G077100	Phvul.006G077100
Pl06G0000193300.v1	Pl06	24442909	24445557				x				Phvul.006G080200	Phvul.006G080200
Pl06G0000193600.v1	Pl06	24495987	24507807				x				Phvul.006G080500	Phvul.006G080500
Pl06G0000198000.v1	Pl06	24823959	24830298							x	Phvul.006G084400	Phvul.006G084400
Pl06G0000198100.v1	Pl06	24834084	24837258							x	Phvul.006G084500	Phvul.006G084500
Pl06G0000198200.v1	Pl06	24839962	24843125							x	Phvul.006G084600	Phvul.006G084600
Pl06G0000198300.v1	Pl06	24851338	24854402							x	Phvul.006G084700	Phvul.006G084700
Pl06G0000198400.v1	Pl06	24859116	24863808							x	Phvul.006G084800	Phvul.006G084800
Pl06G0000198600.v1	Pl06	24868031	24868555				x					Phvul.006G084700
Pl06G0000198700.v1	Pl06	24879799	24884715							x	Phvul.006G084800	Phvul.006G084800
Pl06G0000199000.v1	Pl06	24893905	24898291							x	Phvul.006G084800	Phvul.006G084800
Pl06G0000202100.v1	Pl06	25194469	25197662							x	Phvul.006G087700	Phvul.006G087700	Schmutz et al. 2014
Pl06G0000202400.v1	Pl06	25213233	25219255				x				Phvul.006G087900	Phvul.006G087900
Pl06G0000210400.v1	Pl06	25857855	25861564							x	Phvul.006G095700	Phvul.006G095700
Pl06G0000211700.v1	Pl06	25959817	25963483	x							Phvul.006G096900	Phvul.006G096900
Pl06G0000214900.v1	Pl06	26238251	26241917							x	Phvul.006G099700	Phvul.006G099700
Pl06G0000215600.v1	Pl06	26295213	26300334							x	Phvul.006G100400	Phvul.006G100400
Pl06G0000216700.v1	Pl06	26372758	26375650						x		Phvul.006G101700	Phvul.006G101700
Pl06G0000217600.v1	Pl06	26432589	26436612							x	Phvul.006G102700	Phvul.006G102700
Pl06G0000223500.v1	Pl06	26972560	26977417							x	Phvul.006G108300	Phvul.006G108300
Pl06G0000223600.v1	Pl06	26979208	26981773							x	Phvul.006G108400	Phvul.006G108400
Pl06G0000224900.v1	Pl06	27064961	27068827						x		Phvul.006G109700	Phvul.006G109700
Pl06G0000226800.v1	Pl06	27247629	27250539					x			Phvul.006G111700	Phvul.006G111700	Schmutz et al. 2014
Pl06G0000231200.v1	Pl06	27595441	27597039						x		Phvul.006G116000	Phvul.006G116000
Pl06G0000234200.v1	Pl06	27858329	27869454							x	Phvul.006G118300	Phvul.006G118300
Pl06G0000235200.v1	Pl06	27980048	27982982					x			Phvul.006G119100	Phvul.006G119100
Pl06G0000240100.v1	Pl06	28362692	28370160							x	Phvul.006G122800	Phvul.006G122800
Pl06G0000240300.v1	Pl06	28391467	28395250					x			Phvul.006G123000	Phvul.006G123000
Pl06G0000243600.v1	Pl06	28625626	28631577						x		Phvul.006G126500	Phvul.006G126500
Pl06G0000243800.v1	Pl06	28654432	28659818						x		Phvul.006G126600	Phvul.006G126600
Pl06G0000244900.v1	Pl06	28748046	28753028				x				Phvul.006G127700	Phvul.006G127700
Pl06G0000245100.v1	Pl06	28771481	28772708							x	Phvul.006G127900	Phvul.006G127900
Pl06G0000245900.v1	Pl06	28844474	28850743						x		Phvul.006G128600	Phvul.006G128600
Pl06G0000251000.v1	Pl06	29306877	29315025				x				Phvul.006G133400	Phvul.006G133400
Pl06G0000253800.v1	Pl06	29519342	29519884							x		Phvul.006G137500
Pl06G0000255000.v1	Pl06	29618196	29621668							x	Phvul.006G136500	Phvul.006G136500
Pl06G0000255100.v1	Pl06	29624454	29626390							x	Phvul.006G136600	Phvul.006G136600
Pl06G0000255400.v1	Pl06	29649522	29654819							x	Phvul.006G137500	Phvul.006G137500
Pl06G0000257700.v1	Pl06	29811962	29813821							x		Phvul.006G137300
Pl06G0000262400.v1	Pl06	30139408	30143557							x	Phvul.006G144200	Phvul.006G144200
Pl06G0000264300.v1	Pl06	30358598	30365239				x				Phvul.006G146100	Phvul.006G146100
Pl06G0000264600.v1	Pl06	30382604	30389193							x	Phvul.006G146400	Phvul.006G146400
Pl06G0000265900.v1	Pl06	30466154	30468859					x			Phvul.006G147800	Phvul.006G147800
Pl06G0000266300.v1	Pl06	30506029	30508670	x							Phvul.006G148100	Phvul.006G148100
Pl06G0000269300.v1	Pl06	30777475	30780765							x	Phvul.006G150900	Phvul.006G150900
Pl06G0000276100.v1	Pl06	31407846	31413709				x				Phvul.006G157700	Phvul.006G157700
Pl06G0000277500.v1	Pl06	31495924	31498640							x	Phvul.006G159100	Phvul.006G159100
Pl06G0000278900.v1	Pl06	31618005	31624894							x	Phvul.006G160500	Phvul.006G160500
Pl06G0000279900.v1	Pl06	31677848	31683706							x	Phvul.006G161400	Phvul.006G161400
Pl06G0000280800.v1	Pl06	31736266	31742982							x	Phvul.006G162400	Phvul.006G162400
Pl06G0000284300.v1	Pl06	32145710	32147868				x				Phvul.006G165900	Phvul.006G165900
Pl06G0000285300.v1	Pl06	32265979	32268798							x	Phvul.006G166800	Phvul.006G166800
Pl06G0000285400.v1	Pl06	32275134	32276274				x				Phvul.006G166900	Phvul.006G166900
Pl06G0000289500.v1	Pl06	32604042	32610445							x	Phvul.006G169700	Phvul.006G169700
Pl06G0000290200.v1	Pl06	32655400	32664469				x				Phvul.006G170500	Phvul.006G170500
Pl06G0000293400.v1	Pl06	32918667	32920946				x				Phvul.006G174100	Phvul.006G174100
Pl06G0000293700.v1	Pl06	32938381	32942663				x				Phvul.006G174400	Phvul.006G174400
Pl06G0000293800.v1	Pl06	32944739	32947549							x	Phvul.006G174500	Phvul.006G174500, Phvul.009G089900
Pl06G0000294000.v1	Pl06	32960998	32964752				x				Phvul.006G174700	Phvul.006G174700
Pl06G0000294100.v1	Pl06	32975606	32977123							x	Phvul.006G174800	Phvul.006G174800
Pl06G0000294200.v1	Pl06	32986801	32988111							x	Phvul.006G174900	Phvul.006G174900
Pl06G0000294300.v1	Pl06	33003732	33008854				x				Phvul.006G175100	Phvul.006G175100
Pl06G0000300300.v1	Pl06	33479717	33486603				x				Phvul.006G180200	Phvul.006G180200
Pl06G0000301900.v1	Pl06	33598902	33599906							x	Phvul.006G181600	Phvul.006G181600
Pl06G0000302100.v1	Pl06	33612533	33617439				x				Phvul.006G181800	Phvul.006G181800	Schmutz et al. 2014
Pl06G0000303900.v1	Pl06	33755006	33760503				x				Phvul.006G183300	Phvul.006G183300
Pl06G0000305500.v1	Pl06	33907867	33911065							x	Phvul.006G184700	Phvul.006G184700
Pl06G0000305800.v1	Pl06	33932507	33935424							x	Phvul.006G185000	Phvul.006G185000
Pl06G0000308500.v1	Pl06	34152957	34155535							x	Phvul.006G187700	Phvul.006G187700
Pl06G0000309800.v1	Pl06	34243971	34244633		x						Phvul.006G188800	Phvul.006G188800
Pl06G0000310800.v1	Pl06	34326464	34333675				x				Phvul.006G189800	Phvul.006G189800
Pl06G0000315100.v1	Pl06	34642108	34645589							x	Phvul.006G194100	Phvul.006G194100
Pl06G0000315300.v1	Pl06	34661798	34665289							x	Phvul.006G194300	Phvul.006G194300
Pl06G0000315500.v1	Pl06	34669200	34671914							x
Pl06G0000315600.v1	Pl06	34677466	34681503							x	Phvul.006G194500	Phvul.006G194500	Schmutz et al. 2014
Pl06G0000315700.v1	Pl06	34683571	34688882							x	Phvul.006G194600	Phvul.006G194600	Schmutz et al. 2014
Pl06G0000315800.v1	Pl06	34690863	34695180							x
Pl06G0000315900.v1	Pl06	34698021	34701963							x	Phvul.006G194700	Phvul.006G194700
Pl06G0000318300.v1	Pl06	34833440	34835618				x				Phvul.006G197000	Phvul.006G197000
Pl06G0000319400.v1	Pl06	34910570	34914440				x				Phvul.006G198200	Phvul.006G198200
Pl06G0000321800.v1	Pl06	35094817	35096763							x	Phvul.006G200500	Phvul.006G200500
Pl06G0000322400.v1	Pl06	35117208	35119322							x	Phvul.006G200800	Phvul.006G200800
Pl06G0000329700.v1	Pl06	35599567	35605183				x				Phvul.006G208100	Phvul.006G208100
Pl06G0000329800.v1	Pl06	35612050	35614453				x				Phvul.006G208100	Phvul.006G208100
Pl06G0000337100.v1	Pl06	36122716	36126056							x	Phvul.006G215500	Phvul.006G215500
Pl06G0000338000.v1	Pl06	36207968	36210610							x	Phvul.006G216400	Phvul.006G216400
Pl06G0000339300.v1	Pl06	36267497	36268591							x	Phvul.006G217700	Phvul.006G217700
Pl06G0000340100.v1	Pl06	36322225	36327078	x							Phvul.006G218500	Phvul.006G218500
Pl06G0000341200.v1	Pl06	36397949	36403985							x	Phvul.006G219700	Phvul.006G219700
Pl06G0000341800.v1	Pl06	36436358	36443153							x	Phvul.006G220500	Phvul.006G220400
Pl07G0000001200.v1	Pl07	83672	89383	x							Phvul.007G000500	Phvul.007G000500
Pl07G0000001500.v1	Pl07	100639	105943							x	Phvul.007G000800	Phvul.007G000800
Pl07G0000004100.v1	Pl07	302180	309516						x		Phvul.007G003600	Phvul.007G003600
Pl07G0000004800.v1	Pl07	350002	354786							x	Phvul.007G004200	Phvul.007G004200
Pl07G0000007000.v1	Pl07	523056	525100				x
Pl07G0000013700.v1	Pl07	946280	949322				x				Phvul.007G012600	Phvul.007G012600
Pl07G0000015300.v1	Pl07	1033637	1036473				x				Phvul.007G014200	Phvul.007G014200
Pl07G0000017600.v1	Pl07	1165981	1168717				x				Phvul.007G016400	Phvul.007G016400
Pl07G0000017700.v1	Pl07	1176274	1189091							x	Phvul.007G016500	Phvul.007G016500
Pl07G0000025300.v1	Pl07	1772760	1773914							x
Pl07G0000025400.v1	Pl07	1774542	1775983							x
Pl07G0000026700.v1	Pl07	1917156	1919479				x
Pl07G0000026900.v1	Pl07	1928173	1929352				x
Pl07G0000028000.v1	Pl07	2001676	2009190							x	Phvul.007G026100	Phvul.007G026100
Pl07G0000031800.v1	Pl07	2491267	2494918				x				Phvul.007G029900	Phvul.007G029900
Pl07G0000031900.v1	Pl07	2499212	2502556							x	Phvul.007G030000	Phvul.007G030000
Pl07G0000032000.v1	Pl07	2502666	2505442							x	Phvul.007G030100	Phvul.007G030100
Pl07G0000032200.v1	Pl07	2513094	2514029							x	Phvul.007G030300	Phvul.007G030300
Pl07G0000033200.v1	Pl07	2542655	2546355							x	Phvul.007G030700	Phvul.007G030700
Pl07G0000033300.v1	Pl07	2560816	2562998							x	Phvul.007G030800	Phvul.007G030800
Pl07G0000033400.v1	Pl07	2565889	2569720							x	Phvul.007G030900	Phvul.007G030900
Pl07G0000033500.v1	Pl07	2573134	2575998							x	Phvul.007G031000	Phvul.007G031000
Pl07G0000033600.v1	Pl07	2579605	2582661							x	Phvul.007G031100	Phvul.007G031100
Pl07G0000033700.v1	Pl07	2588348	2588878							x	Phvul.007G031200	Phvul.007G031200
Pl07G0000033800.v1	Pl07	2597066	2602087							x	Phvul.007G031300	Phvul.007G031300
Pl07G0000034600.v1	Pl07	2676281	2678554				x				Phvul.007G032100	Phvul.007G032100	Schmutz et al. 2014
Pl07G0000042600.v1	Pl07	3323887	3325074				x				Phvul.007G038700	Phvul.007G038700
Pl07G0000044500.v1	Pl07	3459435	3463190				x				Phvul.007G040400	Phvul.007G040400
Pl07G0000047500.v1	Pl07	3678821	3681195				x				Phvul.007G043500	Phvul.007G043500
Pl07G0000052700.v1	Pl07	4063071	4066198							x	Phvul.007G048700	Phvul.007G048700
Pl07G0000052800.v1	Pl07	4069647	4073663							x	Phvul.007G048700	Phvul.007G048700
Pl07G0000052900.v1	Pl07	4090616	4091802							x	Phvul.007G049300	Phvul.007G049300
Pl07G0000053000.v1	Pl07	4094917	4097805							x	Phvul.007G049400	Phvul.007G049400
Pl07G0000053100.v1	Pl07	4101282	4104297							x	Phvul.007G049000	Phvul.007G049000
Pl07G0000053200.v1	Pl07	4110645	4113604							x	Phvul.007G049400	Phvul.007G049400
Pl07G0000053300.v1	Pl07	4115460	4118790							x		Phvul.007G052500
Pl07G0000053400.v1	Pl07	4125366	4128539							x	Phvul.007G049600	Phvul.007G049600
Pl07G0000053500.v1	Pl07	4150723	4151490							x	Phvul.007G049700	Phvul.007G049700
Pl07G0000053600.v1	Pl07	4153928	4154710							x	Phvul.007G049800	Phvul.007G049800
Pl07G0000053700.v1	Pl07	4155392	4158592							x	Phvul.007G049900	Phvul.007G049900
Pl07G0000053800.v1	Pl07	4162304	4165358							x	Phvul.007G050100	Phvul.007G050100
Pl07G0000053900.v1	Pl07	4166296	4169390							x	Phvul.007G050200	Phvul.007G050200
Pl07G0000054000.v1	Pl07	4171057	4174603							x	Phvul.007G050300	Phvul.007G050300
Pl07G0000054100.v1	Pl07	4184385	4187996							x	Phvul.007G050300	Phvul.007G050300
Pl07G0000054400.v1	Pl07	4202965	4204557							x	Phvul.007G050400	Phvul.007G050400
Pl07G0000054500.v1	Pl07	4213032	4216965							x	Phvul.007G050500	Phvul.007G050500
Pl07G0000054600.v1	Pl07	4219332	4223073							x	Phvul.007G050600	Phvul.007G050600
Pl07G0000054700.v1	Pl07	4225708	4229518							x	Phvul.007G050700	Phvul.007G050700
Pl07G0000054800.v1	Pl07	4236513	4238490							x	Phvul.007G050800	Phvul.007G050800
Pl07G0000054900.v1	Pl07	4240503	4247481							x	Phvul.007G051000	Phvul.007G051000
Pl07G0000055000.v1	Pl07	4254095	4259363							x	Phvul.007G051100	Phvul.007G051100
Pl07G0000055100.v1	Pl07	4260866	4264718							x	Phvul.007G051200	Phvul.007G051200
Pl07G0000055200.v1	Pl07	4269894	4273019							x	Phvul.007G051300	Phvul.007G051300
Pl07G0000055300.v1	Pl07	4277210	4280677							x	Phvul.007G051400	Phvul.007G051400
Pl07G0000055400.v1	Pl07	4282553	4286405							x	Phvul.007G051400	Phvul.007G051400
Pl07G0000055500.v1	Pl07	4289157	4293736							x	Phvul.007G051500	Phvul.007G051500
Pl07G0000057000.v1	Pl07	4436876	4447379						x		Phvul.007G053200	Phvul.007G053200
Pl07G0000057800.v1	Pl07	4554932	4557003				x				Phvul.007G054100	Phvul.007G054100
Pl07G0000058300.v1	Pl07	4578673	4583773				x				Phvul.007G054600	Phvul.007G054600
Pl07G0000061600.v1	Pl07	4839876	4843789							x	Phvul.007G057000	Phvul.007G057000	Schmutz et al. 2014
Pl07G0000065400.v1	Pl07	5303474	5305713							x	Phvul.007G060400	Phvul.007G060400	Schmutz et al. 2014
Pl07G0000065800.v1	Pl07	5377105	5379093				x				Phvul.007G060800	Phvul.002G140400, Phvul.005G176400, Phvul.007G060800, Phvul.009G229500, Phvul.010G130100, Phvul.011G107500
Pl07G0000067700.v1	Pl07	5577996	5587239				x				Phvul.007G062700	Phvul.007G062700
Pl07G0000068200.v1	Pl07	5651682	5659390				x				Phvul.007G063200	Phvul.007G063200	Schmutz et al. 2014
Pl07G0000069100.v1	Pl07	5753322	5756279							x	Phvul.007G064200	Phvul.007G064200
Pl07G0000069600.v1	Pl07	5796687	5799973							x	Phvul.007G064500	Phvul.007G064500
Pl07G0000074100.v1	Pl07	6274303	6280035						x		Phvul.007G067500	Phvul.007G067500
Pl07G0000074400.v1	Pl07	6315244	6319481				x				Phvul.007G067700	Phvul.007G067700
Pl07G0000076100.v1	Pl07	6444140	6446050				x				Phvul.007G069000	Phvul.007G069000
Pl07G0000077700.v1	Pl07	6580954	6583785				x				Phvul.007G070400	Phvul.007G070400
Pl07G0000079400.v1	Pl07	6799745	6806491							x	Phvul.007G072300	Phvul.007G072300
Pl07G0000081000.v1	Pl07	6970260	6973785							x	Phvul.007G074000	Phvul.007G074000
Pl07G0000082200.v1	Pl07	7071536	7072773					x			Phvul.007G075400	Phvul.007G075400
Pl07G0000085100.v1	Pl07	7386436	7390880							x	Phvul.007G077300	Phvul.007G077300
Pl07G0000085300.v1	Pl07	7403206	7406605				x
Pl07G0000085400.v1	Pl07	7415985	7418525				x				Phvul.007G077500	Phvul.007G077500
Pl07G0000086200.v1	Pl07	7500322	7502364							x	Phvul.007G078200	Phvul.007G078200
Pl07G0000087600.v1	Pl07	7640068	7654274							x	Phvul.007G078800	Phvul.007G078800
Pl07G0000093100.v1	Pl07	8312963	8315134				x				Phvul.007G082500	Phvul.007G082500
Pl07G0000093500.v1	Pl07	8339206	8343777							x	Phvul.007G082900	Phvul.007G082900
Pl07G0000095000.v1	Pl07	8517539	8521036				x				Phvul.007G084400	Phvul.007G084400
Pl07G0000097600.v1	Pl07	8744308	8751571				x				Phvul.007G086800	Phvul.004G086300, Phvul.007G086800
Pl07G0000098200.v1	Pl07	8814872	8821644				x				Phvul.007G087200	Phvul.007G087200, Phvul.007G087300
Pl07G0000098700.v1	Pl07	8857657	8860745				x				Phvul.007G087500	Phvul.007G087500
Pl07G0000098800.v1	Pl07	8866886	8869528				x
Pl07G0000108200.v1	Pl07	10111227	10113146							x	Phvul.007G096600	Phvul.007G096600	Schmutz et al. 2014
Pl07G0000114700.v1	Pl07	10890116	10893161				x				Phvul.007G101600	Phvul.007G101600	Schmutz et al. 2014
Pl07G0000116200.v1	Pl07	11106115	11110938				x				Phvul.007G102400	Phvul.007G102400
Pl07G0000118700.v1	Pl07	11395317	11398403							x	Phvul.007G103900	Phvul.007G103900
Pl07G0000126000.v1	Pl07	12159422	12162516							x	Phvul.007G107300	Phvul.007G107300
Pl07G0000126700.v1	Pl07	12224236	12230447							x	Phvul.007G107900	Phvul.007G107900, Phvul.007G274600
Pl07G0000128900.v1	Pl07	12640504	12641823							x	Phvul.007G110300	Phvul.007G110300
Pl07G0000131300.v1	Pl07	13060434	13063786				x				Phvul.007G112100	Phvul.007G112100	Schmutz et al. 2014
Pl07G0000131500.v1	Pl07	13093823	13097133			x
Pl07G0000137000.v1	Pl07	13780299	13784602	x							Phvul.001G080600	Phvul.001G080600
Pl07G0000138200.v1	Pl07	13936772	13945328							x	Phvul.001G081500	Phvul.001G081500
Pl07G0000141400.v1	Pl07	14389821	14393476					x			Phvul.007G118100	Phvul.007G118100
Pl07G0000141500.v1	Pl07	14397110	14397748					x			Phvul.007G118100	Phvul.007G118100
Pl07G0000143000.v1	Pl07	14504975	14507827					x			Phvul.007G118200	Phvul.007G118200
Pl07G0000143100.v1	Pl07	14511071	14511700					x			Phvul.007G118200	Phvul.007G118200
Pl07G0000148000.v1	Pl07	15050093	15052681			x	x
Pl07G0000148100.v1	Pl07	15064167	15066546							x		Phvul.007G115500
Pl07G0000166200.v1	Pl07	18243370	18246709				x					Phvul.007G116300
Pl07G0000229400.v1	Pl07	29528685	29534982							x	Phvul.007G134500	Phvul.007G134500
Pl07G0000231000.v1	Pl07	29735876	29738698				x				Phvul.007G135200	Phvul.007G135200
Pl07G0000232700.v1	Pl07	29935274	29939582							x	Phvul.007G138200	Phvul.007G138200
Pl07G0000236100.v1	Pl07	30227369	30230751				x				Phvul.007G137800	Phvul.007G137800
Pl07G0000237500.v1	Pl07	30421988	30423895				x
Pl07G0000258300.v1	Pl07	33137327	33142134							x	Phvul.007G213400	Phvul.007G213400
Pl07G0000259700.v1	Pl07	33336969	33340471					x			Phvul.007G212900	Phvul.007G212900
Pl07G0000266000.v1	Pl07	34053149	34056231							x	Phvul.007G210500	Phvul.007G210500
Pl07G0000268300.v1	Pl07	34354459	34357479					x			Phvul.007G209000	Phvul.007G209000
Pl07G0000273800.v1	Pl07	35008299	35012261							x	Phvul.007G204300	Phvul.007G204300
Pl07G0000274500.v1	Pl07	35077503	35081031							x	Phvul.007G204000	Phvul.007G204000, Phvul.008G156000
Pl07G0000286900.v1	Pl07	36412230	36415755							x	Phvul.007G181600	Phvul.007G181600
Pl07G0000288700.v1	Pl07	36551818	36554099							x	Phvul.007G183000	Phvul.007G183000
Pl07G0000290000.v1	Pl07	36713202	36720298							x	Phvul.007G184200	Phvul.007G184200
Pl07G0000290500.v1	Pl07	36747197	36756520							x	Phvul.007G184600	Phvul.007G184600	Schmutz et al. 2014
Pl07G0000291800.v1	Pl07	36895028	36899362							x	Phvul.007G185900	Phvul.007G185900
Pl07G0000292900.v1	Pl07	37009586	37015570							x	Phvul.007G186800	Phvul.007G186800
Pl07G0000293600.v1	Pl07	37075345	37082772						x		Phvul.007G187400	Phvul.007G187400
Pl07G0000294500.v1	Pl07	37147796	37150384							x	Phvul.007G188300	Phvul.007G188300
Pl07G0000297800.v1	Pl07	37414238	37415596				x					Phvul.007G191000
Pl07G0000298200.v1	Pl07	37459800	37462310							x	Phvul.007G191400	Phvul.007G107900, Phvul.007G191400, Phvul.007G191500
Pl07G0000298300.v1	Pl07	37462595	37464126							x	Phvul.007G191400	Phvul.007G191400
Pl07G0000298400.v1	Pl07	37498021	37505251							x	Phvul.007G191400	Phvul.007G191400
Pl07G0000298900.v1	Pl07	37550012	37555788							x	Phvul.007G192000	Phvul.007G192000
Pl07G0000305200.v1	Pl07	38324553	38327601					x			Phvul.007G177900	Phvul.007G177900
Pl07G0000309100.v1	Pl07	38750736	38756422							x	Phvul.007G174200	Phvul.007G174200
Pl07G0000311300.v1	Pl07	39010748	39012346				x				Phvul.007G172200	Phvul.007G172200
Pl07G0000315700.v1	Pl07	39414516	39417430							x	Phvul.007G168100	Phvul.007G168100
Pl07G0000315800.v1	Pl07	39428582	39431313							x	Phvul.007G168000	Phvul.007G168000
Pl07G0000316000.v1	Pl07	39445030	39447293				x				Phvul.007G167800	Phvul.007G167800
Pl07G0000317600.v1	Pl07	39639983	39642496				x				Phvul.007G166200	Phvul.007G166200	Schmutz et al. 2014
Pl07G0000321700.v1	Pl07	39957379	39963657				x				Phvul.007G163000	Phvul.007G163000
Pl07G0000322400.v1	Pl07	40057825	40060712							x	Phvul.007G162300	Phvul.007G162300
Pl07G0000329900.v1	Pl07	40823481	40827233							x	Phvul.007G154500	Phvul.007G154500	Schmutz et al. 2014
Pl07G0000331300.v1	Pl07	40918862	40922325				x				Phvul.007G153400	Phvul.007G153400
Pl07G0000335100.v1	Pl07	41327926	41332038							x	Phvul.007G149900	Phvul.007G149900	Schmutz et al. 2014
Pl07G0000339800.v1	Pl07	41775429	41777702							x	Phvul.007G220700	Phvul.007G220700
Pl07G0000339900.v1	Pl07	41798465	41800817							x	Phvul.007G220800	Phvul.007G220800
Pl07G0000340800.v1	Pl07	41914557	41918799				x				Phvul.007G221800	Phvul.007G221800
Pl07G0000341200.v1	Pl07	41954736	41955542							x	Phvul.007G222100	Phvul.007G222100
Pl07G0000342800.v1	Pl07	42119319	42123357							x	Phvul.007G223500	Phvul.007G223500
Pl07G0000343600.v1	Pl07	42244212	42247351				x				Phvul.007G224300	Phvul.007G224300
Pl07G0000344200.v1	Pl07	42286573	42288823						x		Phvul.007G224800	Phvul.007G224800
Pl07G0000344400.v1	Pl07	42294949	42305838							x	Phvul.007G225000	Phvul.007G225000
Pl07G0000354200.v1	Pl07	43325954	43328726							x	Phvul.007G234400	Phvul.007G234400
Pl07G0000361200.v1	Pl07	44005246	44018984							x	Phvul.007G241300	Phvul.007G241300
Pl07G0000367100.v1	Pl07	44479914	44494795							x	Phvul.007G245500	Phvul.007G245400, Phvul.007G245500
Pl07G0000368200.v1	Pl07	44573171	44576741				x				Phvul.007G246600	Phvul.007G246600
Pl07G0000368300.v1	Pl07	44584910	44585881				x				Phvul.007G246600	Phvul.007G246600
Pl07G0000368400.v1	Pl07	44585981	44587122				x				Phvul.007G246600	Phvul.007G246600
Pl07G0000368600.v1	Pl07	44599165	44603132				x				Phvul.007G246600	Phvul.007G246600
Pl07G0000368700.v1	Pl07	44608086	44610899				x				Phvul.007G246600	Phvul.007G246600
Pl07G0000374500.v1	Pl07	45115462	45118302							x	Phvul.007G252500	Phvul.007G252500
Pl07G0000376000.v1	Pl07	45241437	45244190							x	Phvul.007G254000	Phvul.007G254000
Pl07G0000376200.v1	Pl07	45277673	45278053				x				Phvul.007G254200	Phvul.007G254200
Pl07G0000376600.v1	Pl07	45303003	45305564				x				Phvul.007G254300	Phvul.007G254300
Pl07G0000376700.v1	Pl07	45308657	45311194			x					Phvul.007G254500	Phvul.007G254500
Pl07G0000376800.v1	Pl07	45313502	45314725				x				Phvul.007G254500	Phvul.007G254500
Pl07G0000376900.v1	Pl07	45315624	45316060				x				Phvul.007G254500	Phvul.007G254500
Pl07G0000377000.v1	Pl07	45320508	45322861			x						Phvul.007G254200
Pl07G0000377100.v1	Pl07	45328632	45331325				x				Phvul.007G254500	Phvul.007G254500
Pl07G0000377300.v1	Pl07	45339720	45342272				x				Phvul.007G254700	Phvul.007G254700	Meziadi et al. 2016; Richard et al. 2018
Pl07G0000377500.v1	Pl07	45356153	45358980			x	x				Phvul.007G254900	Phvul.007G254900	Meziadi et al. 2016; Richard et al. 2018
Pl07G0000378500.v1	Pl07	45464396	45472302							x	Phvul.007G255900	Phvul.007G255900
Pl07G0000380700.v1	Pl07	45632847	45639771						x		Phvul.007G257700	Phvul.007G257700
Pl07G0000381000.v1	Pl07	45672843	45678276				x				Phvul.007G258000	Phvul.007G258000
Pl07G0000383600.v1	Pl07	45909413	45911847							x	Phvul.007G260300	Phvul.007G260300, Phvul.007G260400
Pl07G0000383700.v1	Pl07	45903499	45905511							x	Phvul.007G260400	Phvul.007G260300, Phvul.007G260400
Pl07G0000383800.v1	Pl07	45916845	45918212							x	Phvul.007G260500	Phvul.007G260500
Pl07G0000384300.v1	Pl07	45987337	45989942						x		Phvul.007G260900	Phvul.007G260900
Pl07G0000384600.v1	Pl07	46016232	46018927							x	Phvul.007G261200	Phvul.007G261200
Pl07G0000385300.v1	Pl07	46128718	46136277				x				Phvul.007G261900	Phvul.007G261900
Pl07G0000392400.v1	Pl07	46754131	46758382				x				Phvul.007G268200	Phvul.007G268200, Phvul.007G268600
Pl07G0000400000.v1	Pl07	47459979	47469337							x	Phvul.007G274600	Phvul.007G274600
Pl08G0000000600.v1	Pl08	48985	51450							x	Phvul.008G000200	Phvul.008G000200
Pl08G0000001000.v1	Pl08	77528	80520				x				Phvul.008G000600	Phvul.008G000600	Schmutz et al. 2014
Pl08G0000001900.v1	Pl08	124062	125391							x	Phvul.008G001400	Phvul.008G001400
Pl08G0000002300.v1	Pl08	156715	161279							x	Phvul.008G001400	Phvul.008G001400	Schmutz et al. 2014
Pl08G0000010200.v1	Pl08	934233	937730							x	Phvul.008G007900	Phvul.008G007900
Pl08G0000010300.v1	Pl08	939563	942049							x	Phvul.008G007900	Phvul.008G007900
Pl08G0000010400.v1	Pl08	944959	945729							x	Phvul.008G008000	Phvul.008G008000
Pl08G0000017200.v1	Pl08	1418086	1419821				x				Phvul.008G014700	Phvul.008G014700	Meziadi et al. 2016; Richard et al. 2018
Pl08G0000020500.v1	Pl08	1630957	1634105				x				Phvul.008G017400	Phvul.008G017400
Pl08G0000022400.v1	Pl08	1807920	1811281							x	Phvul.008G019200	Phvul.008G019200
Pl08G0000024300.v1	Pl08	1952452	1957319			x	x				Phvul.008G020700	Phvul.008G020700
Pl08G0000024500.v1	Pl08	1968063	1971233			x					Phvul.008G020700	Phvul.008G020700
Pl08G0000024600.v1	Pl08	1972869	1979508							x	Phvul.008G021000	Phvul.008G021000
Pl08G0000026300.v1	Pl08	2087844	2091449				x				Phvul.008G022700	Phvul.008G022700
Pl08G0000028500.v1	Pl08	2238197	2242165							x	Phvul.008G025200	Phvul.008G025200
Pl08G0000029800.v1	Pl08	2350707	2356160							x	Phvul.008G026800	Phvul.008G026800, Phvul.008G027000
Pl08G0000030600.v1	Pl08	2424420	2425516							x		Phvul.008G028200
Pl08G0000030700.v1	Pl08	2428363	2429102							x	Phvul.008G027100	Phvul.008G027100
Pl08G0000030800.v1	Pl08	2433307	2435264							x	Phvul.008G028600	Phvul.008G028600
Pl08G0000030900.v1	Pl08	2442086	2443732							x	Phvul.008G028600	Phvul.008G028600
Pl08G0000031000.v1	Pl08	2446156	2446738							x	Phvul.008G028600	Phvul.008G028600
Pl08G0000031900.v1	Pl08	2514133	2517159				x
Pl08G0000032000.v1	Pl08	2518561	2519657							x	Phvul.008G029500	Phvul.008G029500
Pl08G0000032100.v1	Pl08	2520781	2521892							x		Phvul.008G030000
Pl08G0000032200.v1	Pl08	2531290	2533239							x	Phvul.008G029500	Phvul.008G029500
Pl08G0000032300.v1	Pl08	2536651	2539260							x	Phvul.008G030200	Phvul.008G029800, Phvul.008G030200
Pl08G0000032500.v1	Pl08	2545249	2547060							x	Phvul.008G030400	Phvul.008G030400
Pl08G0000032700.v1	Pl08	2558541	2561123							x	Phvul.008G030700	Phvul.008G030700
Pl08G0000032900.v1	Pl08	2574259	2576877							x	Phvul.008G030800	Phvul.008G030800
Pl08G0000033200.v1	Pl08	2591302	2592300							x	Phvul.008G031100	Phvul.008G031100
Pl08G0000033300.v1	Pl08	2593929	2597602			x					Phvul.008G031200	Phvul.008G031200	Meziadi et al. 2016; Richard et al. 2018
Pl08G0000033400.v1	Pl08	2602064	2603167							x	Phvul.008G031300	Phvul.008G031300
Pl08G0000043000.v1	Pl08	3380057	3387539							x	Phvul.008G039400	Phvul.008G039400
Pl08G0000043400.v1	Pl08	3416958	3422164					x			Phvul.008G039900	Phvul.008G039900
Pl08G0000045900.v1	Pl08	3712172	3714545						x		Phvul.008G042200	Phvul.008G042200
Pl08G0000046300.v1	Pl08	3739614	3742479							x		Phvul.007G274600
Pl08G0000047500.v1	Pl08	3800546	3803124					x			Phvul.008G043000	Phvul.008G043000
Pl08G0000047900.v1	Pl08	3831686	3834903				x				Phvul.008G043400	Phvul.008G043400
Pl08G0000048400.v1	Pl08	3869281	3873576							x	Phvul.008G043900	Phvul.008G043900
Pl08G0000049500.v1	Pl08	3986780	3989225				x				Phvul.008G045200	Phvul.008G045200
Pl08G0000049700.v1	Pl08	3997086	3999237				x				Phvul.008G045200	Phvul.008G045200
Pl08G0000049900.v1	Pl08	4026976	4029496				x					Phvul.008G044600
Pl08G0000050300.v1	Pl08	4069745	4073386						x			Phvul.008G045100
Pl08G0000050400.v1	Pl08	4077893	4083436				x				Phvul.008G045200	Phvul.008G045200
Pl08G0000051900.v1	Pl08	4216448	4219843							x	Phvul.008G046900	Phvul.008G046900
Pl08G0000052700.v1	Pl08	4330407	4334194				x				Phvul.008G047600	Phvul.008G047600
Pl08G0000053000.v1	Pl08	4367210	4371120				x				Phvul.008G047800	Phvul.008G047800
Pl08G0000053500.v1	Pl08	4412704	4420330					x			Phvul.008G048100	Phvul.008G048100
Pl08G0000056000.v1	Pl08	4606120	4609000				x				Phvul.008G050700	Phvul.008G050700
Pl08G0000056800.v1	Pl08	4698918	4706438						x		Phvul.008G051400	Phvul.008G051400
Pl08G0000059800.v1	Pl08	4981806	4985417					x			Phvul.008G054100	Phvul.008G054100
Pl08G0000061200.v1	Pl08	5103964	5107261				x				Phvul.008G055400	Phvul.008G055400
Pl08G0000062600.v1	Pl08	5204900	5207305							x	Phvul.008G056800	Phvul.008G056800
Pl08G0000062700.v1	Pl08	5208692	5211310							x	Phvul.008G056900	Phvul.008G056900
Pl08G0000064500.v1	Pl08	5331692	5332090					x			Phvul.008G058000	Phvul.008G058000
Pl08G0000064800.v1	Pl08	5350548	5352828					x			Phvul.008G058300	Phvul.008G058300
Pl08G0000065100.v1	Pl08	5410422	5414154							x	Phvul.008G058600	Phvul.008G058600
Pl08G0000065200.v1	Pl08	5419331	5422282							x	Phvul.008G058800	Phvul.008G058800
Pl08G0000065800.v1	Pl08	5479492	5482763							x	Phvul.008G059400	Phvul.008G059400
Pl08G0000066400.v1	Pl08	5549759	5551654							x	Phvul.008G060000	Phvul.008G060000
Pl08G0000067900.v1	Pl08	5739398	5742088			x	x				Phvul.008G061300	Phvul.008G061300	Meziadi et al. 2016; Richard et al. 2018
Pl08G0000069100.v1	Pl08	5828265	5834909							x	Phvul.008G062200	Phvul.008G062200
Pl08G0000073800.v1	Pl08	6291160	6292875				x				Phvul.008G066600	Phvul.008G066600
Pl08G0000074300.v1	Pl08	6316155	6321843							x	Phvul.008G067600	Phvul.008G067600
Pl08G0000076400.v1	Pl08	6453381	6455084				x				Phvul.008G067200	Phvul.008G067200
Pl08G0000077500.v1	Pl08	6554829	6556537				x				Phvul.008G070800	Phvul.008G070800
Pl08G0000077600.v1	Pl08	6560661	6567777			x					Phvul.008G071300	Phvul.008G071300
Pl08G0000078100.v1	Pl08	6617887	6628530			x	x				Phvul.008G072000	Phvul.008G072000	Richard et al. 2018
Pl08G0000078300.v1	Pl08	6643103	6652870			x	x				Phvul.008G072000	Phvul.008G072000	Richard et al. 2018
Pl08G0000078400.v1	Pl08	6663579	6675602			x					Phvul.008G072100	Phvul.008G072100
Pl08G0000079100.v1	Pl08	6710921	6711843				x				Phvul.008G072200	Phvul.008G072200
Pl08G0000079300.v1	Pl08	6721677	6733652			x	x					Phvul.008G072100
Pl08G0000079400.v1	Pl08	6744267	6753975			x					Phvul.008G072300	Phvul.008G072300	Meziadi et al. 2016; Richard et al. 2018
Pl08G0000079700.v1	Pl08	6822454	6827707						x		Phvul.008G072700	Phvul.008G072700
Pl08G0000079800.v1	Pl08	6846734	6851677							x	Phvul.008G072800	Phvul.008G072800
Pl08G0000080500.v1	Pl08	6905618	6906756				x				Phvul.008G073500	Phvul.008G073500
Pl08G0000080600.v1	Pl08	6910276	6911502				x				Phvul.008G073600	Phvul.008G073600
Pl08G0000080700.v1	Pl08	6918338	6919475				x					Phvul.008G073500
Pl08G0000084500.v1	Pl08	7416546	7419728							x	Phvul.008G077200	Phvul.008G077200
Pl08G0000084800.v1	Pl08	7435027	7442610							x	Phvul.008G077500	Phvul.008G077500
Pl08G0000085000.v1	Pl08	7456842	7464551							x	Phvul.008G077500	Phvul.008G077500
Pl08G0000085200.v1	Pl08	7478443	7479467							x	Phvul.008G077700	Phvul.008G077700
Pl08G0000085500.v1	Pl08	7494468	7496081							x	Phvul.008G077800	Phvul.008G077800
Pl08G0000087600.v1	Pl08	7682309	7684939				x				Phvul.008G079700	Phvul.008G079700
Pl08G0000087700.v1	Pl08	7690866	7699077				x				Phvul.008G079800	Phvul.008G079800
Pl08G0000087900.v1	Pl08	7716606	7724443				x				Phvul.008G080000	Phvul.008G080000
Pl08G0000088300.v1	Pl08	7759488	7761662				x				Phvul.008G080500	Phvul.008G080500
Pl08G0000088700.v1	Pl08	7792989	7795685							x	Phvul.008G082400	Phvul.008G081000, Phvul.008G082400
Pl08G0000089200.v1	Pl08	7816407	7819254							x	Phvul.008G081300	Phvul.008G081300
Pl08G0000089300.v1	Pl08	7820663	7824288							x	Phvul.008G081400	Phvul.008G081400
Pl08G0000089800.v1	Pl08	7871653	7873199					x			Phvul.008G081800	Phvul.008G081800
Pl08G0000090200.v1	Pl08	7908127	7910826							x	Phvul.008G082400	Phvul.008G081000, Phvul.008G082400
Pl08G0000090800.v1	Pl08	7951293	7955582				x				Phvul.008G082500	Phvul.008G082500
Pl08G0000091300.v1	Pl08	7988404	7991742							x	Phvul.008G083000	Phvul.008G083000
Pl08G0000092100.v1	Pl08	8052342	8057145							x	Phvul.008G083700	Phvul.008G083700
Pl08G0000092400.v1	Pl08	8087975	8091008							x	Phvul.008G084000	Phvul.008G084000
Pl08G0000093000.v1	Pl08	8152450	8155040							x	Phvul.008G085000	Phvul.008G085000
Pl08G0000093500.v1	Pl08	8234203	8236342							x	Phvul.008G084600	Phvul.008G084600
Pl08G0000094800.v1	Pl08	8387861	8393912			x	x
Pl08G0000098000.v1	Pl08	8736753	8740126					x			Phvul.008G090300	Phvul.008G090300
Pl08G0000100500.v1	Pl08	8984481	8990013				x				Phvul.008G093000	Phvul.008G093000
Pl08G0000100700.v1	Pl08	9006147	9009320				x				Phvul.008G093200	Phvul.008G093200
Pl08G0000101800.v1	Pl08	9093399	9096719				x				Phvul.008G093900	Phvul.008G093900
Pl08G0000102400.v1	Pl08	9142165	9144354							x	Phvul.008G094500	Phvul.008G094500	Schmutz et al. 2014
Pl08G0000103400.v1	Pl08	9248681	9250778				x				Phvul.008G095300	Phvul.008G095300
Pl08G0000103500.v1	Pl08	9255340	9258887				x				Phvul.008G095300	Phvul.008G095300
Pl08G0000103800.v1	Pl08	9291497	9293734			x
Pl08G0000105300.v1	Pl08	9438446	9441130				x				Phvul.008G096900	Phvul.008G096900
Pl08G0000106100.v1	Pl08	9515756	9518745				x					Phvul.008G105600	González et al. 2017
Pl08G0000106500.v1	Pl08	9545470	9551572							x	Phvul.008G105300	Phvul.008G105300	González et al. 2017
Pl08G0000110800.v1	Pl08	10068333	10071465				x					Phvul.008G105600
Pl08G0000112000.v1	Pl08	10182235	10185979				x				Phvul.008G106500	Phvul.008G106500
Pl08G0000114200.v1	Pl08	10488259	10493134				x				Phvul.008G108500	Phvul.008G108400, Phvul.008G108500
Pl08G0000115300.v1	Pl08	10598603	10599351				x
Pl08G0000115400.v1	Pl08	10606385	10607148				x					Phvul.008G109600
Pl08G0000115500.v1	Pl08	10612951	10614045				x				Phvul.008G109000	Phvul.008G109000
Pl08G0000115800.v1	Pl08	10643993	10647943				x					Phvul.008G111700
Pl08G0000115900.v1	Pl08	10652261	10655821				x
Pl08G0000116700.v1	Pl08	10811189	10824269				x
Pl08G0000116900.v1	Pl08	10856903	10857341				x				Phvul.008G109300	Phvul.008G109300
Pl08G0000118500.v1	Pl08	10970403	10972107							x	Phvul.008G111500	Phvul.008G111500
Pl08G0000118600.v1	Pl08	10983499	10987586				x				Phvul.008G111800	Phvul.008G111600, Phvul.008G111800
Pl08G0000118700.v1	Pl08	10992265	10993771				x
Pl08G0000123700.v1	Pl08	11616098	11618695							x	Phvul.008G115500	Phvul.008G115500	González et al. 2017
Pl08G0000128700.v1	Pl08	12024737	12028347							x	Phvul.008G117700	Phvul.008G117700
Pl08G0000128900.v1	Pl08	12048090	12050753							x	Phvul.008G117800	Phvul.008G117800
Pl08G0000130800.v1	Pl08	12241608	12244879					x			Phvul.008G119400	Phvul.008G119400
Pl08G0000132300.v1	Pl08	12491876	12494997							x	Phvul.008G120600	Phvul.008G120600	González et al. 2017
Pl08G0000137700.v1	Pl08	13199643	13203520				x				Phvul.008G122200	Phvul.008G122200	González et al. 2017
Pl08G0000137900.v1	Pl08	13237303	13240161				x				Phvul.008G122400	Phvul.008G122400	González et al. 2017
Pl08G0000139400.v1	Pl08	13457469	13473592							x	Phvul.008G122700	Phvul.008G122700	González et al. 2017
Pl08G0000140900.v1	Pl08	13672495	13675499							x	Phvul.008G124200	Phvul.008G124200	González et al. 2017
Pl08G0000141100.v1	Pl08	13736388	13738658							x	Phvul.008G124300	Phvul.008G124300	González et al. 2017
Pl08G0000141600.v1	Pl08	13814412	13816203				x				Phvul.008G124400	Phvul.008G124400, Phvul.008G124500
Pl08G0000141700.v1	Pl08	13836796	13839997							x	Phvul.008G124800	Phvul.008G124800	González et al. 2017
Pl08G0000141800.v1	Pl08	13848967	13851786							x	Phvul.008G124900	Phvul.008G124900	González et al. 2017
Pl08G0000142100.v1	Pl08	13915142	13916411				x
Pl08G0000142200.v1	Pl08	13917292	13922507				x
Pl08G0000145000.v1	Pl08	14340718	14343932							x	Phvul.008G126800	Phvul.008G126800
Pl08G0000145200.v1	Pl08	14372605	14375734							x	Phvul.008G126800	Phvul.008G126800
Pl08G0000145300.v1	Pl08	14376942	14380133							x	Phvul.008G127000	Phvul.008G127000
Pl08G0000145500.v1	Pl08	14432630	14436125							x	Phvul.008G127100	Phvul.008G127100
Pl08G0000146500.v1	Pl08	14509597	14512531							x	Phvul.008G127100	Phvul.008G127100
Pl08G0000147400.v1	Pl08	14585803	14610286				x				Phvul.008G127700	Phvul.008G127700, Phvul.008G127900
Pl08G0000150300.v1	Pl08	14956760	14959787				x				Phvul.008G129800	Phvul.008G129800	González et al. 2017
Pl08G0000159300.v1	Pl08	16189341	16191395							x	Phvul.008G134800	Phvul.008G134800
Pl08G0000173900.v1	Pl08	18471220	18474328							x	Phvul.008G139200	Phvul.008G139200	González et al. 2017
Pl08G0000234200.v1	Pl08	32782493	32784500				x					Phvul.008G154600
Pl08G0000246800.v1	Pl08	35751689	35754607				x				Phvul.008G146600	Phvul.008G146600
Pl08G0000249400.v1	Pl08	36376955	36380260				x				Phvul.008G146000	Phvul.008G146000
Pl08G0000255500.v1	Pl08	37498170	37500923				x				Phvul.008G154200	Phvul.008G154200
Pl08G0000260300.v1	Pl08	38266846	38268908				x				Phvul.008G152500	Phvul.008G152500
Pl08G0000269000.v1	Pl08	39678584	39681735							x	Phvul.008G156000	Phvul.007G204000, Phvul.008G156000
Pl08G0000270300.v1	Pl08	39903073	39907166							x	Phvul.008G156400	Phvul.008G156400
Pl08G0000275500.v1	Pl08	40893855	40894403			x
Pl08G0000275900.v1	Pl08	40974657	40978970				x				Phvul.008G158100	Phvul.008G158100
Pl08G0000277900.v1	Pl08	41292654	41295275				x				Phvul.008G159500	Phvul.008G159500
Pl08G0000279600.v1	Pl08	41538230	41542443				x				Phvul.008G160700	Phvul.008G160700
Pl08G0000288500.v1	Pl08	42748447	42759080				x				Phvul.008G164300	Phvul.008G164300
Pl08G0000288600.v1	Pl08	42767453	42789402				x				Phvul.008G164600	Phvul.008G164500, Phvul.008G164600
Pl08G0000291100.v1	Pl08	43094531	43105014							x		Phvul.008G166700
Pl08G0000303100.v1	Pl08	44838648	44841567				x				Phvul.008G173600	Phvul.008G173600
Pl08G0000303900.v1	Pl08	44955319	44958327				x				Phvul.008G173900	Phvul.008G173900
Pl08G0000304400.v1	Pl08	45054812	45056663							x		Phvul.008G175200
Pl08G0000305000.v1	Pl08	45096994	45099238							x		Phvul.008G174300
Pl08G0000305300.v1	Pl08	45125852	45126943							x	Phvul.008G175100	Phvul.008G174900, Phvul.008G175100
Pl08G0000305500.v1	Pl08	45130105	45132035							x	Phvul.008G175200	Phvul.008G175200
Pl08G0000306600.v1	Pl08	45341157	45344749							x	Phvul.008G176300	Phvul.008G176300
Pl08G0000310600.v1	Pl08	45849533	45853002				x				Phvul.008G179000	Phvul.008G179000	Schmutz et al. 2014
Pl08G0000311100.v1	Pl08	45947179	45949152							x	Phvul.008G179300	Phvul.008G179300
Pl08G0000314600.v1	Pl08	46527882	46533734							x	Phvul.008G182800	Phvul.008G182700, Phvul.008G182800
Pl08G0000315100.v1	Pl08	46607500	46614390			x
Pl08G0000317800.v1	Pl08	46834350	46840786							x	Phvul.008G184400	Phvul.008G184400
Pl08G0000319500.v1	Pl08	47074684	47077251					x			Phvul.008G185700	Phvul.008G185700
Pl08G0000319600.v1	Pl08	47080865	47088384					x			Phvul.008G185800	Phvul.008G185800
Pl08G0000320600.v1	Pl08	47187069	47190403							x	Phvul.008G186700	Phvul.008G186700
Pl08G0000320800.v1	Pl08	47196596	47200550				x				Phvul.008G186900	Phvul.008G186900
Pl08G0000322800.v1	Pl08	47363992	47367104							x	Phvul.008G188700	Phvul.008G188700
Pl08G0000324600.v1	Pl08	47604845	47609480							x	Phvul.008G190300	Phvul.008G190300, Phvul.008G264100
Pl08G0000326800.v1	Pl08	47781837	47784997					x			Phvul.008G192800	Phvul.008G192800
Pl08G0000326900.v1	Pl08	47793190	47796894							x	Phvul.008G192900	Phvul.008G192900
Pl08G0000328800.v1	Pl08	48030829	48060232		x	x					Phvul.008G194700	Phvul.008G194700
Pl08G0000328900.v1	Pl08	48045951	48046529		x						Phvul.008G195300	Phvul.008G195300
Pl08G0000329600.v1	Pl08	48115643	48116140		x						Phvul.008G195300	Phvul.008G195300	Richard et al. 2018
Pl08G0000330100.v1	Pl08	48166873	48183208		x	x					Phvul.008G195100	Phvul.008G195000, Phvul.008G195300
Pl08G0000338500.v1	Pl08	48955473	48968739						x
Pl08G0000342800.v1	Pl08	49215624	49218907							x	Phvul.008G205600	Phvul.008G205600
Pl08G0000342900.v1	Pl08	49241221	49246353							x	Phvul.008G205700	Phvul.008G205700
Pl08G0000344600.v1	Pl08	49367364	49371988				x				Phvul.008G206700	Phvul.008G206700
Pl08G0000345000.v1	Pl08	49409913	49415322				x				Phvul.008G207200	Phvul.008G207200
Pl08G0000348000.v1	Pl08	49596907	49604844							x	Phvul.008G210200	Phvul.008G210200
Pl08G0000349100.v1	Pl08	49751453	49752109							x	Phvul.008G211200	Phvul.008G211200
Pl08G0000350900.v1	Pl08	49892777	49912024				x				Phvul.008G213200	Phvul.008G213200
Pl08G0000358400.v1	Pl08	50563933	50567577				x				Phvul.008G220100	Phvul.008G220100	Schmutz et al. 2014
Pl08G0000360900.v1	Pl08	50765115	50769350				x				Phvul.008G221900	Phvul.008G221900
Pl08G0000363200.v1	Pl08	51082903	51085293							x	Phvul.008G223900	Phvul.008G223900	Schmutz et al. 2014
Pl08G0000364200.v1	Pl08	51153714	51157192				x				Phvul.008G224900	Phvul.008G224900	Schmutz et al. 2014
Pl08G0000364300.v1	Pl08	51166281	51169533				x				Phvul.008G225000	Phvul.008G225000	Schmutz et al. 2014
Pl08G0000366100.v1	Pl08	51348380	51354108				x				Phvul.008G226500	Phvul.008G226500	Schmutz et al. 2014
Pl08G0000375300.v1	Pl08	52244644	52248888							x	Phvul.008G233400	Phvul.008G233400
Pl08G0000376700.v1	Pl08	52340000	52343178							x	Phvul.008G234600	Phvul.008G234600
Pl08G0000380100.v1	Pl08	52768531	52772191				x				Phvul.008G236900	Phvul.008G236900
Pl08G0000381800.v1	Pl08	52951856	52955499				x				Phvul.008G238600	Phvul.008G238600
Pl08G0000382800.v1	Pl08	53066114	53069726							x	Phvul.008G239600	Phvul.008G239600
Pl08G0000388000.v1	Pl08	53587704	53590900							x	Phvul.008G244400	Phvul.008G244400
Pl08G0000388100.v1	Pl08	53591764	53601168				x				Phvul.008G244400	Phvul.008G244400
Pl08G0000388300.v1	Pl08	53614279	53619239			x						Phvul.008G247000
Pl08G0000388700.v1	Pl08	53637948	53642934			x						Phvul.008G247000
Pl08G0000388800.v1	Pl08	53648842	53649487							x	Phvul.008G245600	Phvul.008G245600
Pl08G0000388900.v1	Pl08	53661069	53666451			x						Phvul.008G245100
Pl08G0000389000.v1	Pl08	53667505	53672370							x	Phvul.008G245600	Phvul.008G245600
Pl08G0000389300.v1	Pl08	53681914	53683167							x	Phvul.008G245600	Phvul.008G245600
Pl08G0000389400.v1	Pl08	53683824	53685250				x				Phvul.008G245600	Phvul.008G245600
Pl08G0000389500.v1	Pl08	53690339	53695380			x
Pl08G0000389600.v1	Pl08	53696548	53706127				x				Phvul.008G245600	Phvul.008G244600, Phvul.008G245300, Phvul.008G245600
Pl08G0000389900.v1	Pl08	53751157	53754545				x				Phvul.008G245900	Phvul.008G245900
Pl08G0000390700.v1	Pl08	53817374	53820139			x					Phvul.008G246500
Pl08G0000391800.v1	Pl08	53932860	53938282							x	Phvul.008G248200	Phvul.008G248200
Pl08G0000392600.v1	Pl08	53995499	53996800							x	Phvul.008G248800	Phvul.008G248800
Pl08G0000392700.v1	Pl08	54007375	54009462							x	Phvul.008G248900	Phvul.008G248900
Pl08G0000395000.v1	Pl08	54201750	54206994				x				Phvul.008G251200	Phvul.008G251200
Pl08G0000395100.v1	Pl08	54220518	54223889					x			Phvul.008G251300	Phvul.008G251300
Pl08G0000395600.v1	Pl08	54259728	54261005					x			Phvul.008G251700	Phvul.008G251700
Pl08G0000395700.v1	Pl08	54267506	54269000					x			Phvul.008G251700	Phvul.008G251700
Pl08G0000397200.v1	Pl08	54365683	54368881							x	Phvul.008G253500	Phvul.008G253500
Pl08G0000402900.v1	Pl08	54771588	54776527							x	Phvul.008G258400	Phvul.008G258400
Pl08G0000403200.v1	Pl08	54801789	54808317				x				Phvul.008G258700	Phvul.008G258700
Pl08G0000409000.v1	Pl08	55258780	55264103							x	Phvul.008G263900	Phvul.008G263900
Pl08G0000409200.v1	Pl08	55267686	55272725							x	Phvul.008G264100	Phvul.008G190300, Phvul.008G264100
Pl08G0000409400.v1	Pl08	55282216	55292516				x				Phvul.008G264400	Phvul.008G264400
Pl08G0000410700.v1	Pl08	55382711	55386238							x	Phvul.008G265800	Phvul.008G265800
Pl08G0000410800.v1	Pl08	55390391	55392426		x	x					Phvul.008G265900	Phvul.008G265900
Pl08G0000412600.v1	Pl08	55531594	55533929		x	x					Phvul.008G267600	Phvul.008G267600
Pl08G0000412700.v1	Pl08	55535943	55537212		x	x					Phvul.008G267700	Phvul.008G267700
Pl08G0000413200.v1	Pl08	55561013	55563782				x				Phvul.008G268300	Phvul.008G268300
Pl08G0000415300.v1	Pl08	55712791	55715649					x			Phvul.008G270500	Phvul.008G270500
Pl08G0000416900.v1	Pl08	55838178	55839435				x				Phvul.008G272100	Phvul.008G272100
Pl08G0000418700.v1	Pl08	55953937	55956945				x				Phvul.008G273900	Phvul.008G273900
Pl08G0000418800.v1	Pl08	55961696	55964425				x				Phvul.008G273600	Phvul.008G273600
Pl08G0000418900.v1	Pl08	55970193	55972847				x				Phvul.008G273800	Phvul.008G273800
Pl08G0000419900.v1	Pl08	56035873	56038198				x				Phvul.008G275000	Phvul.008G275000	Gil et al. 2019
Pl08G0000420000.v1	Pl08	56041120	56043757							x	Phvul.008G275100	Phvul.008G275100	Gil et al. 2019
Pl08G0000420200.v1	Pl08	56058100	56063798					x			Phvul.008G275300	Phvul.008G275300	Gil et al. 2019
Pl08G0000420900.v1	Pl08	56103263	56121163				x				Phvul.008G277300	Phvul.008G281100	Gil et al. 2019
Pl08G0000421600.v1	Pl08	56169441	56172020				x				Phvul.008G277300	Phvul.008G281000	Gil et al. 2019
Pl08G0000424200.v1	Pl08	56269234	56271246							x	Phvul.008G279300	Phvul.008G279300	Gil et al. 2019
Pl08G0000426200.v1	Pl08	56430834	56434657				x				Phvul.008G281500	Phvul.008G281500
Pl08G0000429300.v1	Pl08	56654306	56662200			x	x				Phvul.008G284500	Phvul.008G284500
Pl08G0000429400.v1	Pl08	56668860	56671256			x					Phvul.008G284500	Phvul.008G284500
Pl08G0000429800.v1	Pl08	56687153	56689972							x	Phvul.008G284800	Phvul.008G284800
Pl08G0000431100.v1	Pl08	56766784	56769157					x			Phvul.008G286100	Phvul.008G286100
Pl08G0000431300.v1	Pl08	56775297	56777203							x	Phvul.008G286300	Phvul.008G286300
Pl08G0000435900.v1	Pl08	57020493	57027556							x	Phvul.008G291100	Phvul.008G291100
Pl08G0000436800.v1	Pl08	57103974	57107222							x	Phvul.008G292000	Phvul.008G292000
Pl09G0000002100.v1	Pl09	162988	164190	x							Phvul.009G117000	Phvul.009G117000
Pl09G0000014600.v1	Pl09	991149	995680				x				Phvul.009G023800	Phvul.009G023800
Pl09G0000014700.v1	Pl09	1000339	1003405							x	Phvul.009G023900	Phvul.009G023900
Pl09G0000015000.v1	Pl09	1023032	1026330							x	Phvul.009G024200	Phvul.009G024200
Pl09G0000019100.v1	Pl09	1316327	1320237							x	Phvul.009G011600	Phvul.009G011600
Pl09G0000019200.v1	Pl09	1329964	1333761							x	Phvul.009G011400	Phvul.009G011400
Pl09G0000022100.v1	Pl09	1577136	1583697							x	Phvul.009G020600	Phvul.009G020600
Pl09G0000028500.v1	Pl09	2149499	2153897				x				Phvul.009G014500	Phvul.009G014500
Pl09G0000037500.v1	Pl09	2843879	2850002							x
Pl09G0000038300.v1	Pl09	2900396	2902255				x				Phvul.009G062000	Phvul.003G011500, Phvul.009G062000
Pl09G0000044600.v1	Pl09	3428103	3432184				x				Phvul.009G067200	Phvul.009G067200
Pl09G0000045400.v1	Pl09	3514784	3517177							x	Phvul.009G068100	Phvul.009G068100, Phvul.009G068200
Pl09G0000045500.v1	Pl09	3523059	3525452							x	Phvul.009G068100	Phvul.009G068200
Pl09G0000045600.v1	Pl09	3539461	3541863							x	Phvul.009G068300	Phvul.009G068300
Pl09G0000052800.v1	Pl09	4121232	4123726						x		Phvul.009G075300	Phvul.009G075300
Pl09G0000055700.v1	Pl09	4372122	4382857							x	Phvul.009G079700	Phvul.009G079700
Pl09G0000056100.v1	Pl09	4409556	4413212							x	Phvul.009G079300	Phvul.009G079300
Pl09G0000057500.v1	Pl09	4514003	4520755					x			Phvul.009G080000	Phvul.009G079900	Schmutz et al. 2014
Pl09G0000059500.v1	Pl09	4681466	4687685				x				Phvul.009G081900	Phvul.009G081900
Pl09G0000060100.v1	Pl09	4721220	4725501				x				Phvul.009G082500	Phvul.009G082500
Pl09G0000060700.v1	Pl09	4782820	4784740							x	Phvul.009G083300	Phvul.009G083300
Pl09G0000065100.v1	Pl09	5138708	5140327					x			Phvul.009G087400	Phvul.009G087400
Pl09G0000065200.v1	Pl09	5151561	5153870							x	Phvul.009G087500	Phvul.009G087500
Pl09G0000065600.v1	Pl09	5213469	5213999		x
Pl09G0000067200.v1	Pl09	5377924	5380979							x	Phvul.009G089500	Phvul.009G089500
Pl09G0000067500.v1	Pl09	5421295	5426169							x	Phvul.009G089900	Phvul.006G174500, Phvul.009G089900
Pl09G0000070500.v1	Pl09	5729760	5732204							x	Phvul.009G092900	Phvul.009G092900
Pl09G0000070900.v1	Pl09	5748073	5750783				x				Phvul.009G093200	Phvul.009G080700, Phvul.009G093200
Pl09G0000075200.v1	Pl09	6114776	6120576	x							Phvul.009G097000	Phvul.009G097000
Pl09G0000080600.v1	Pl09	6626580	6628156					x			Phvul.009G101900	Phvul.009G101900
Pl09G0000081200.v1	Pl09	6688893	6693549							x	Phvul.009G102500	Phvul.009G102500
Pl09G0000081500.v1	Pl09	6707018	6709398				x				Phvul.009G103100	Phvul.009G103100
Pl09G0000082500.v1	Pl09	6773068	6777392						x		Phvul.009G104100	Phvul.009G104100
Pl09G0000083200.v1	Pl09	6825873	6829116							x	Phvul.009G104800	Phvul.009G104800
Pl09G0000085000.v1	Pl09	7001527	7006322							x	Phvul.009G106200	Phvul.009G106200
Pl09G0000090100.v1	Pl09	7523857	7529922						x		Phvul.009G110500	Phvul.009G110500
Pl09G0000090200.v1	Pl09	7540849	7544569				x				Phvul.009G110600	Phvul.009G110600
Pl09G0000091700.v1	Pl09	7706192	7710730				x				Phvul.009G112200	Phvul.009G112200
Pl09G0000092000.v1	Pl09	7733692	7736879							x	Phvul.009G112600	Phvul.009G112600
Pl09G0000093600.v1	Pl09	7916646	7920844				x				Phvul.009G114400	Phvul.009G114400
Pl09G0000093700.v1	Pl09	7943834	7947413				x				Phvul.009G114500	Phvul.009G114500
Pl09G0000095900.v1	Pl09	8238347	8240575							x	Phvul.009G145400	Phvul.009G145400
Pl09G0000098900.v1	Pl09	8537730	8550781							x	Phvul.009G037900	Phvul.009G037900
Pl09G0000100900.v1	Pl09	8731545	8737241				x				Phvul.009G036000	Phvul.009G036000
Pl09G0000100900.v1	Pl09	8732613	8736544				x				Phvul.009G036000	Phvul.009G036000
Pl09G0000101100.v1	Pl09	8745034	8752815							x	Phvul.009G035800	Phvul.009G035800
Pl09G0000105100.v1	Pl09	9296924	9300719				x				Phvul.009G031700	Phvul.009G031700	Schmutz et al. 2014
Pl09G0000115100.v1	Pl09	10419968	10423804							x	Phvul.009G121600	Phvul.009G121600
Pl09G0000116000.v1	Pl09	10501568	10504147							x	Phvul.009G122600	Phvul.009G122600
Pl09G0000125100.v1	Pl09	11603171	11607205							x	Phvul.009G130300	Phvul.009G130300
Pl09G0000127100.v1	Pl09	11808032	11810824							x	Phvul.009G131600	Phvul.009G131600
Pl09G0000127200.v1	Pl09	11812226	11815328							x	Phvul.009G131700	Phvul.009G131700
Pl09G0000127300.v1	Pl09	11825491	11829461							x	Phvul.009G131900	Phvul.009G131900
Pl09G0000128600.v1	Pl09	11912898	11916788							x	Phvul.009G133000	Phvul.009G133000
Pl09G0000128800.v1	Pl09	11962200	11965259				x				Phvul.009G133200	Phvul.009G133200
Pl09G0000132300.v1	Pl09	12328178	12332991				x				Phvul.009G136200	Phvul.009G136200	Schmutz et al. 2014
Pl09G0000133000.v1	Pl09	12407370	12411983				x				Phvul.009G136800	Phvul.009G136800	Schmutz et al. 2014
Pl09G0000133900.v1	Pl09	12538854	12540928					x			Phvul.009G137500	Phvul.009G137500	Schmutz et al. 2014
Pl09G0000143700.v1	Pl09	13686528	13688356						x			Phvul.009G049600
Pl09G0000144700.v1	Pl09	13798997	13799855				x					Phvul.009G046900
Pl09G0000144900.v1	Pl09	13852330	13856054				x					Phvul.009G046900
Pl09G0000145300.v1	Pl09	13894333	13897367				x					Phvul.009G046600
Pl09G0000145500.v1	Pl09	13924510	13926241				x					Phvul.009G046600
Pl09G0000145600.v1	Pl09	13926329	13926970				x					Phvul.009G046600
Pl09G0000147300.v1	Pl09	14108906	14110366							x		Phvul.009G106200
Pl09G0000147400.v1	Pl09	14110776	14111705							x
Pl09G0000147700.v1	Pl09	14118645	14119763							x
Pl09G0000154300.v1	Pl09	14848549	14851414				x					Phvul.009G042300
Pl09G0000155200.v1	Pl09	14939927	14942883					x				Phvul.009G043100	Schmutz et al. 2014
Pl09G0000155300.v1	Pl09	14950331	14953257					x				Phvul.009G043200	Schmutz et al. 2014
Pl09G0000155900.v1	Pl09	15031127	15035779				x					Phvul.009G043600	Schmutz et al. 2014
Pl09G0000161000.v1	Pl09	15578608	15584422				x					Phvul.009G140500
Pl09G0000163000.v1	Pl09	15794345	15796667					x			Phvul.009G138900	Phvul.009G138900
Pl09G0000163400.v1	Pl09	15861580	15865067					x			Phvul.009G138600	Phvul.009G138600
Pl09G0000163500.v1	Pl09	15914700	15919124				x				Phvul.009G138500	Phvul.009G138500
Pl09G0000163700.v1	Pl09	15968714	15973484							x	Phvul.009G138300	Phvul.009G138300	Schmutz et al. 2014
Pl09G0000168400.v1	Pl09	16528115	16529260							x
Pl09G0000168700.v1	Pl09	16540708	16543594							x	Phvul.009G148000	Phvul.009G148000
Pl09G0000179500.v1	Pl09	17920979	17924019							x	Phvul.009G155000	Phvul.009G155000
Pl09G0000186300.v1	Pl09	18873441	18877121							x	Phvul.009G157800	Phvul.009G157800	Schmutz et al. 2014
Pl09G0000197100.v1	Pl09	20706341	20710199							x		Phvul.009G163500
Pl09G0000222000.v1	Pl09	24800802	24802561							x
Pl09G0000225400.v1	Pl09	25287954	25292634				x				Phvul.009G167600	Phvul.009G167600	Schmutz et al. 2014
Pl09G0000228100.v1	Pl09	25686476	25687658							x
Pl09G0000232900.v1	Pl09	26461649	26463934				x				Phvul.009G171200	Phvul.009G171200
Pl09G0000240900.v1	Pl09	27548041	27552335							x	Phvul.009G173100	Phvul.009G173100
Pl09G0000242400.v1	Pl09	27715700	27720086							x	Phvul.009G174100	Phvul.009G174100
Pl09G0000242700.v1	Pl09	27744126	27748024				x				Phvul.009G174300	Phvul.009G174300
Pl09G0000249700.v1	Pl09	28654703	28657555				x				Phvul.009G176400	Phvul.009G176400
Pl09G0000256100.v1	Pl09	29561984	29566959							x	Phvul.009G179100	Phvul.009G179100
Pl09G0000257800.v1	Pl09	29885186	29893038				x				Phvul.009G180400	Phvul.009G180400
Pl09G0000257900.v1	Pl09	29888825	29889582							x
Pl09G0000258300.v1	Pl09	29936525	29939075				x				Phvul.009G180700	Phvul.009G180700
Pl09G0000263600.v1	Pl09	30635154	30638246				x				Phvul.009G184500	Phvul.009G184500	Schmutz et al. 2014
Pl09G0000271400.v1	Pl09	31781188	31784543					x			Phvul.009G189700	Phvul.009G189700
Pl09G0000272200.v1	Pl09	31838822	31841649						x		Phvul.009G190200	Phvul.009G190200
Pl09G0000272800.v1	Pl09	31869638	31873475				x				Phvul.009G190400	Phvul.009G190400
Pl09G0000276800.v1	Pl09	32420375	32429585				x				Phvul.009G193700	Phvul.009G193700
Pl09G0000278400.v1	Pl09	32609903	32617384					x			Phvul.009G195200	Phvul.009G195200	Schmutz et al. 2014
Pl09G0000278800.v1	Pl09	32687945	32691367				x				Phvul.009G195900	Phvul.009G195900	Schmutz et al. 2014
Pl09G0000281900.v1	Pl09	33074577	33077291							x	Phvul.009G198500	Phvul.009G198500
Pl09G0000282200.v1	Pl09	33109763	33111115							x	Phvul.009G198800	Phvul.009G198800	Schmutz et al. 2014
Pl09G0000294300.v1	Pl09	34563664	34564017							x
Pl09G0000298300.v1	Pl09	35132729	35134748							x	Phvul.009G206900	Phvul.009G206900
Pl09G0000299000.v1	Pl09	35207464	35210611				x				Phvul.009G207300	Phvul.009G207300	Schmutz et al. 2014
Pl09G0000300300.v1	Pl09	35345347	35349120				x				Phvul.009G208500	Phvul.009G208500
Pl09G0000301500.v1	Pl09	35427887	35431137				x				Phvul.009G209200	Phvul.009G209200
Pl09G0000302200.v1	Pl09	35480774	35487265							x	Phvul.009G209700	Phvul.009G209700
Pl09G0000304900.v1	Pl09	35808095	35811453							x	Phvul.009G213000	Phvul.009G213000
Pl09G0000306000.v1	Pl09	35912409	35913613				x
Pl09G0000306100.v1	Pl09	35921453	35922665				x				Phvul.009G214000	Phvul.009G214000
Pl09G0000306200.v1	Pl09	35924166	35924903				x
Pl09G0000306300.v1	Pl09	35930001	35931219				x				Phvul.009G214100	Phvul.009G214100
Pl09G0000310100.v1	Pl09	36327124	36361578				x				Phvul.009G217700	Phvul.009G217700
Pl09G0000311700.v1	Pl09	36548257	36552152							x	Phvul.009G219300	Phvul.009G219300
Pl09G0000312400.v1	Pl09	36617819	36622882							x	Phvul.009G220200	Phvul.009G220200
Pl09G0000313000.v1	Pl09	36697235	36700605					x			Phvul.009G220700	Phvul.009G220700
Pl09G0000317600.v1	Pl09	37119007	37125084							x	Phvul.009G224500	Phvul.009G224500
Pl09G0000318700.v1	Pl09	37280178	37283319				x				Phvul.009G225700	Phvul.009G225700
Pl09G0000319900.v1	Pl09	37406542	37409437							x	Phvul.009G227000	Phvul.009G227000
Pl09G0000320400.v1	Pl09	37444174	37449534				x				Phvul.009G227500	Phvul.009G227500
Pl09G0000323300.v1	Pl09	37738928	37752814							x	Phvul.009G230200	Phvul.009G230200
Pl09G0000325600.v1	Pl09	37992691	38003755							x	Phvul.009G232100	Phvul.009G232100
Pl09G0000326500.v1	Pl09	38093955	38097915							x	Phvul.009G233300	Phvul.009G233300
Pl09G0000326600.v1	Pl09	38109664	38111377						x		Phvul.009G233400	Phvul.009G233400
Pl09G0000326900.v1	Pl09	38128460	38132603			x					Phvul.009G233700	Phvul.009G233700	Meziadi et al. 2016; Richard et al. 2018
Pl09G0000327100.v1	Pl09	38150990	38153196					x			Phvul.009G233900	Phvul.009G233900
Pl09G0000327700.v1	Pl09	38193982	38197647				x				Phvul.009G234500	Phvul.009G234500
Pl09G0000331100.v1	Pl09	38566023	38572104		x		x				Phvul.009G237600	Phvul.009G237600	Meziadi et al. 2016; Richard et al. 2018
Pl09G0000332800.v1	Pl09	38775117	38777227							x	Phvul.009G239500	Phvul.009G239500
Pl09G0000332900.v1	Pl09	38778682	38779776							x	Phvul.009G239600	Phvul.009G239600
Pl09G0000333000.v1	Pl09	38782074	38784338							x		Phvul.009G239800
Pl09G0000333100.v1	Pl09	38786902	38788460							x		Phvul.009G239900
Pl09G0000333200.v1	Pl09	38790815	38792401							x	Phvul.009G239700	Phvul.009G239700
Pl09G0000333300.v1	Pl09	38794942	38796900							x	Phvul.009G239700	Phvul.009G239700
Pl09G0000333500.v1	Pl09	38808912	38813134							x	Phvul.009G240100	Phvul.009G240100
Pl09G0000336300.v1	Pl09	38995477	38999455							x	Phvul.009G240400	Phvul.009G240400
Pl09G0000341600.v1	Pl09	39483565	39488191				x				Phvul.009G244600	Phvul.009G244600
Pl09G0000354600.v1	Pl09	40445738	40450466							x	Phvul.009G257000	Phvul.009G257000
Pl09G0000356500.v1	Pl09	40590520	40593858							x	Phvul.009G259800	Phvul.009G259800
Pl09G0000357200.v1	Pl09	40661776	40664905				x				Phvul.009G260500	Phvul.009G260500
Pl09G0000357400.v1	Pl09	40669611	40669871				x				Phvul.009G260500	Phvul.009G260500
Pl09G0000357700.v1	Pl09	40685313	40693257				x				Phvul.009G260900	Phvul.009G260900
Pl10G0000002500.v1	Pl10	185720	190370							x	Phvul.010G058100	Phvul.010G058100, Phvul.010G058200
Pl10G0000002800.v1	Pl10	200944	203146					x			Phvul.010G057900	Phvul.010G057900	González et al. 2017
Pl10G0000003300.v1	Pl10	230902	234193							x	Phvul.010G057600	Phvul.010G057600	González et al. 2017
Pl10G0000003400.v1	Pl10	237858	238929							x	Phvul.010G057300	Phvul.010G057300	González et al. 2017
Pl10G0000003600.v1	Pl10	248923	251664							x	Phvul.010G057100	Phvul.010G057100	González et al. 2017
Pl10G0000003900.v1	Pl10	286379	289733							x	Phvul.010G057000	Phvul.010G057000	González et al. 2017
Pl10G0000005500.v1	Pl10	502222	505952		x	x					Phvul.010G055200	Phvul.010G055200
Pl10G0000005600.v1	Pl10	509830	514570		x	x					Phvul.010G055200	Phvul.010G055200
Pl10G0000005700.v1	Pl10	520433	521343		x						Phvul.010G055200	Phvul.010G055200
Pl10G0000005800.v1	Pl10	527485	528404		x						Phvul.010G054800	Phvul.010G054800
Pl10G0000006000.v1	Pl10	538085	540579			x						Phvul.010G055200
Pl10G0000006100.v1	Pl10	547394	551201		x						Phvul.010G054200	Phvul.010G054200
Pl10G0000006200.v1	Pl10	555612	559256		x	x					Phvul.010G054200	Phvul.010G054200
Pl10G0000006400.v1	Pl10	571607	573808				x					Phvul.010G055200
Pl10G0000006500.v1	Pl10	579209	581490		x	x						Phvul.010G054600
Pl10G0000009000.v1	Pl10	835201	838986						x		Phvul.010G052200	Phvul.010G052200	González et al. 2017
Pl10G0000010900.v1	Pl10	1008000	1011800							x	Phvul.010G050000	Phvul.010G050000	González et al. 2017
Pl10G0000013500.v1	Pl10	1260852	1269736							x	Phvul.010G046800	Phvul.010G046800
Pl10G0000013800.v1	Pl10	1300104	1307259					x			Phvul.010G046500	Phvul.010G046500	González et al. 2017
Pl10G0000016000.v1	Pl10	1546615	1548900							x	Phvul.010G043600	Phvul.010G043600
Pl10G0000016400.v1	Pl10	1585754	1589487							x	Phvul.010G043100	Phvul.010G043100
Pl10G0000022400.v1	Pl10	2410778	2414440			x
Pl10G0000022900.v1	Pl10	2479459	2480501				x
Pl10G0000023000.v1	Pl10	2484448	2487051				x				Phvul.010G035800	Phvul.010G035800
Pl10G0000025900.v1	Pl10	2861696	2864194							x	Phvul.010G032000	Phvul.010G032000
Pl10G0000026000.v1	Pl10	2871318	2874167							x	Phvul.010G031900	Phvul.010G031900
Pl10G0000028200.v1	Pl10	3144793	3147809							x	Phvul.010G030100	Phvul.010G030100
Pl10G0000028500.v1	Pl10	3177669	3179573		x	x						Phvul.010G028100
Pl10G0000028600.v1	Pl10	3186113	3187618		x							Phvul.010G028100
Pl10G0000029200.v1	Pl10	3232936	3236146		x	x					Phvul.010G028500	Phvul.010G028500
Pl10G0000029400.v1	Pl10	3251208	3255500		x	x					Phvul.010G028500	Phvul.010G028500
Pl10G0000029600.v1	Pl10	3267525	3270648		x	x						Phvul.010G028900
Pl10G0000029700.v1	Pl10	3281963	3285911		x	x
Pl10G0000029800.v1	Pl10	3301538	3304621		x	x						Phvul.010G028900
Pl10G0000030000.v1	Pl10	3331251	3333871		x	x					Phvul.010G028500	Phvul.010G028500
Pl10G0000030300.v1	Pl10	3352399	3354326			x						Phvul.010G028800
Pl10G0000030600.v1	Pl10	3370442	3373274			x						Phvul.010G028900
Pl10G0000031200.v1	Pl10	3422454	3426213				x					Phvul.010G027900, Phvul.010G028000, Phvul.010G028100, Phvul.010G028900	Meziadi et al. 2016
Pl10G0000031300.v1	Pl10	3430521	3432228		x	x						Phvul.010G027300
Pl10G0000031400.v1	Pl10	3441232	3445223		x	x						Phvul.010G028900
Pl10G0000031500.v1	Pl10	3453451	3457159		x							Phvul.010G029100
Pl10G0000032200.v1	Pl10	3513560	3515043		x	x						Phvul.010G028100
Pl10G0000032800.v1	Pl10	3540823	3542594		x	x					Phvul.010G028400	Phvul.010G028400
Pl10G0000033500.v1	Pl10	3560224	3561757			x						Phvul.010G027900
Pl10G0000033700.v1	Pl10	3567322	3568233							x	Phvul.010G028300	Phvul.010G028300
Pl10G0000033800.v1	Pl10	3585891	3590950				x				Phvul.010G028200	Phvul.010G028200	Meziadi et al. 2016; Richard et al. 2018
Pl10G0000033900.v1	Pl10	3612950	3617256		x	x					Phvul.010G028100	Phvul.010G028100
Pl10G0000034000.v1	Pl10	3629189	3630206		x	x					Phvul.010G028100	Phvul.010G028100
Pl10G0000034100.v1	Pl10	3647434	3649506		x	x					Phvul.010G027800	Phvul.010G027800
Pl10G0000034300.v1	Pl10	3662440	3662796		x							Phvul.010G026700	Meziadi et al. 2016; Richard et al. 2018
Pl10G0000034500.v1	Pl10	3678336	3678789			x
Pl10G0000034600.v1	Pl10	3686563	3687137		x							Phvul.010G028100
Pl10G0000035000.v1	Pl10	3703032	3706959			x
Pl10G0000035100.v1	Pl10	3711860	3714233			x					Phvul.010G027100	Phvul.010G027100
Pl10G0000035400.v1	Pl10	3733284	3737982			x					Phvul.010G026700	Phvul.010G026700
Pl10G0000035500.v1	Pl10	3738517	3743610		x	x					Phvul.010G026200	Phvul.010G026200	Meziadi et al. 2016; Richard et al. 2018
Pl10G0000035600.v1	Pl10	3753025	3758319		x	x					Phvul.010G026100	Phvul.010G026100
Pl10G0000035700.v1	Pl10	3761452	3763904				x				Phvul.010G026000	Phvul.010G026000
Pl10G0000036000.v1	Pl10	3789448	3794839		x	x					Phvul.010G026000	Phvul.010G026000
Pl10G0000036700.v1	Pl10	3856451	3860166		x	x	x					Phvul.010G026700
Pl10G0000036800.v1	Pl10	3871419	3876670		x	x						Phvul.010G026100
Pl10G0000036900.v1	Pl10	3878011	3881999			x					Phvul.010G026000	Phvul.010G026000
Pl10G0000037200.v1	Pl10	3906882	3911720		x	x					Phvul.010G026400	Phvul.010G026400
Pl10G0000037500.v1	Pl10	3925372	3929252			x					Phvul.010G025400	Phvul.010G025400
Pl10G0000037800.v1	Pl10	3973097	3977214		x	x					Phvul.010G025400	Phvul.010G025400
Pl10G0000037900.v1	Pl10	3990338	3993950			x					Phvul.010G025300	Phvul.010G025300
Pl10G0000038000.v1	Pl10	3999738	4003712				x					Phvul.010G025500	Meziadi et al. 2016; Richard et al. 2018
Pl10G0000038100.v1	Pl10	4004205	4007817			x					Phvul.010G025200	Phvul.010G025200
Pl10G0000038500.v1	Pl10	4034528	4039684			x					Phvul.010G025100	Phvul.010G025100
Pl10G0000038600.v1	Pl10	4050011	4054833		x	x					Phvul.010G025000	Phvul.010G025000	Meziadi et al. 2016; Richard et al. 2018
Pl10G0000040200.v1	Pl10	4290845	4299957		x	x	x
Pl10G0000040500.v1	Pl10	4349520	4351184		x	x
Pl10G0000040600.v1	Pl10	4364076	4365622			x
Pl10G0000040800.v1	Pl10	4395727	4397495		x	x						Phvul.010G023500
Pl10G0000041100.v1	Pl10	4431558	4435377			x					Phvul.010G024200	Phvul.010G024200
Pl10G0000041700.v1	Pl10	4472494	4475298		x	x
Pl10G0000041800.v1	Pl10	4486408	4490139		x	x	x
Pl10G0000042500.v1	Pl10	4590977	4597742							x	Phvul.010G023600	Phvul.010G023600	González et al. 2017
Pl10G0000042600.v1	Pl10	4602523	4607303		x	x					Phvul.010G023500	Phvul.010G023500
Pl10G0000042800.v1	Pl10	4628066	4631853			x					Phvul.010G023200	Phvul.010G023200
Pl10G0000043100.v1	Pl10	4664846	4667227			x					Phvul.010G023200	Phvul.010G023200
Pl10G0000046600.v1	Pl10	5076716	5079123		x	x					Phvul.010G023500	Phvul.010G023500
Pl10G0000048900.v1	Pl10	5300043	5305304							x	Phvul.010G018900	Phvul.010G018900
Pl10G0000049400.v1	Pl10	5378699	5384327				x				Phvul.010G018300	Phvul.010G018300	González et al. 2017
Pl10G0000052200.v1	Pl10	5753109	5755649							x	Phvul.010G015800	Phvul.010G015800
Pl10G0000053000.v1	Pl10	5887453	5896425							x	Phvul.010G015100	Phvul.010G015100, Phvul.010G015200
Pl10G0000056000.v1	Pl10	6302787	6306002				x				Phvul.010G013700	Phvul.010G013600, Phvul.010G013700
Pl10G0000056400.v1	Pl10	6338919	6340649				x				Phvul.010G013700	Phvul.010G013600, Phvul.010G013700
Pl10G0000056500.v1	Pl10	6340747	6342129				x				Phvul.010G013600	Phvul.010G013600, Phvul.010G013700	González et al. 2017
Pl10G0000057000.v1	Pl10	6409053	6412376				x				Phvul.010G013600	Phvul.010G013600, Phvul.010G013700
Pl10G0000066400.v1	Pl10	7735923	7739428							x	Phvul.010G010300	Phvul.010G010300, Phvul.010G074500
Pl10G0000069450.v1	Pl10	8530622	8548952		x	x					Phvul.010G008700	Phvul.010G008700	González et al. 2017; Meziadi et al. 2016; Richard et al. 2018
Pl10G0000075400.v1	Pl10	9471023	9472529							x	Phvul.010G006300	Phvul.010G006300
Pl10G0000141100.v1	Pl10	21281299	21286730				x				Phvul.010G062400	Phvul.010G062400	González et al. 2017
Pl10G0000141400.v1	Pl10	21314752	21318087					x			Phvul.010G062500	Phvul.010G062500	González et al. 2017
Pl10G0000142200.v1	Pl10	21468975	21473253			x						Phvul.010G063700
Pl10G0000143100.v1	Pl10	21563513	21567388			x	x				Phvul.010G063100	Phvul.010G063100	González et al. 2017; Meziadi et al. 2016; Richard et al. 2018
Pl10G0000146100.v1	Pl10	22042629	22047272			x
Pl10G0000148400.v1	Pl10	22348961	22352704			x	x
Pl10G0000149400.v1	Pl10	22553383	22557562			x
Pl10G0000150400.v1	Pl10	22649778	22650901			x						Phvul.003G002300, Phvul.003G002400, Phvul.003G002600	Meziadi et al. 2016
Pl10G0000154200.v1	Pl10	23211346	23215050				x					Phvul.010G064300	González et al. 2017
Pl10G0000154500.v1	Pl10	23244253	23245734			x	x
Pl10G0000155900.v1	Pl10	23433190	23436930			x
Pl10G0000159800.v1	Pl10	24037831	24041061			x
Pl10G0000160800.v1	Pl10	24128359	24133462		x	x						Phvul.010G064800	González et al. 2017; Meziadi et al. 2016; Richard et al. 2018; Schmutz et al. 2014
Pl10G0000161200.v1	Pl10	24346070	24351044				x					Phvul.010G064900	González et al. 2017
Pl10G0000190000.v1	Pl10	29540097	29542103							x		Phvul.010G060800	González et al. 2017
Pl10G0000214000.v1	Pl10	34786983	34789766							x		Phvul.011G202200
Pl10G0000214500.v1	Pl10	34829694	34832915				x
Pl10G0000215000.v1	Pl10	34926121	34928736				x
Pl10G0000218700.v1	Pl10	35675452	35679227				x					Phvul.010G073300	González et al. 2017; Schmutz et al. 2014
Pl10G0000225900.v1	Pl10	37916275	37920784							x		Phvul.010G075300	González et al. 2017
Pl10G0000242300.v1	Pl10	40761043	40763194							x	Phvul.010G067600	Phvul.010G067600	González et al. 2017
Pl10G0000242900.v1	Pl10	40927398	40932881							x	Phvul.010G067900	Phvul.010G067900	González et al. 2017; Schmutz et al. 2014
Pl10G0000243400.v1	Pl10	41024148	41031196							x	Phvul.010G068300	Phvul.010G068300	González et al. 2017
Pl10G0000244700.v1	Pl10	41232605	41235614							x	Phvul.010G070100	Phvul.010G070100
Pl10G0000246300.v1	Pl10	41432920	41436997				x				Phvul.010G070400	Phvul.010G070400	González et al. 2017; Schmutz et al. 2014
Pl10G0000265500.v1	Pl10	44229517	44230358				x				Phvul.010G082400	Phvul.010G082400
Pl10G0000265900.v1	Pl10	44265509	44268844				x				Phvul.010G082400	Phvul.010G082400	González et al. 2017
Pl10G0000266100.v1	Pl10	44289223	44290005							x	Phvul.010G082400	Phvul.010G082400
Pl10G0000266200.v1	Pl10	44313405	44316079				x				Phvul.010G082400	Phvul.010G082400
Pl10G0000266400.v1	Pl10	44381618	44384877				x				Phvul.010G082400	Phvul.010G082400
Pl10G0000266500.v1	Pl10	44390400	44393500				x				Phvul.010G082400	Phvul.010G082400
Pl10G0000266900.v1	Pl10	44469131	44470362							x	Phvul.010G082800	Phvul.010G082800	González et al. 2017
Pl10G0000272200.v1	Pl10	45035249	45038555							x		Phvul.010G048600	Schmutz et al. 2014
Pl10G0000273400.v1	Pl10	45229639	45232019							x		Phvul.010G086600	González et al. 2017
Pl10G0000275500.v1	Pl10	45599106	45602156							x	Phvul.010G088500	Phvul.010G088500
Pl10G0000275900.v1	Pl10	45625894	45629214				x				Phvul.010G088600	Phvul.010G088600	González et al. 2017
Pl10G0000276100.v1	Pl10	45665845	45668646				x				Phvul.010G088600	Phvul.010G088600
Pl10G0000277900.v1	Pl10	45902789	45907626							x	Phvul.010G090200	Phvul.010G090200
Pl10G0000278000.v1	Pl10	45923136	45929576						x		Phvul.010G090300	Phvul.010G090300
Pl10G0000279000.v1	Pl10	46048206	46056846			x	x				Phvul.010G091100	Phvul.010G091100	González et al. 2017; Meziadi et al. 2016; Richard et al. 2018
Pl10G0000279500.v1	Pl10	46154644	46158171			x					Phvul.010G091800	Phvul.010G091800, Phvul.010G091900	Meziadi et al. 2016
Pl10G0000279800.v1	Pl10	46186406	46189309			x
Pl10G0000286800.v1	Pl10	46843865	46850120							x	Phvul.010G097200	Phvul.010G097200
Pl10G0000288600.v1	Pl10	47048872	47055098							x	Phvul.010G099400	Phvul.010G099400, Phvul.010G100900
Pl10G0000289800.v1	Pl10	47213065	47216593							x	Phvul.010G100400	Phvul.010G100400	González et al. 2017
Pl10G0000290100.v1	Pl10	47237308	47241165							x	Phvul.010G100700	Phvul.010G100700
Pl10G0000290900.v1	Pl10	47374492	47381070		x	x	x				Phvul.010G101200	Phvul.010G101200	Meziadi et al. 2016; Richard et al. 2018
Pl10G0000292700.v1	Pl10	47509907	47513372							x	Phvul.010G103100	Phvul.010G103100	González et al. 2017
Pl10G0000293700.v1	Pl10	47650192	47652072					x			Phvul.010G104200	Phvul.010G104200	González et al. 2017
Pl10G0000294100.v1	Pl10	47681901	47695261			x
Pl10G0000294500.v1	Pl10	47725154	47739097			x
Pl10G0000294900.v1	Pl10	47787118	47788674			x
Pl10G0000295200.v1	Pl10	47841386	47843025					x			Phvul.010G104700	Phvul.010G104700	González et al. 2017
Pl10G0000298800.v1	Pl10	48187005	48190736						x		Phvul.010G108800	Phvul.010G108800	Schmutz et al. 2014
Pl10G0000301300.v1	Pl10	48479189	48482244							x	Phvul.010G111000	Phvul.010G111000	González et al. 2017
Pl10G0000302400.v1	Pl10	48603302	48606264					x			Phvul.010G111900	Phvul.010G111900	González et al. 2017
Pl10G0000306400.v1	Pl10	49145862	49149866							x	Phvul.010G115800	Phvul.010G115800	González et al. 2017
Pl10G0000308300.v1	Pl10	49333067	49334333						x		Phvul.010G117200	Phvul.010G117200	Schmutz et al. 2014
Pl10G0000309800.v1	Pl10	49573282	49578568							x	Phvul.010G118300	Phvul.010G118300	González et al. 2017
Pl10G0000312400.v1	Pl10	49901627	49906855							x	Phvul.010G120500	Phvul.010G120500
Pl10G0000314400.v1	Pl10	50099941	50107871				x				Phvul.010G122100	Phvul.010G122100
Pl10G0000318600.v1	Pl10	50473484	50474684				x				Phvul.010G126500	Phvul.010G126500
Pl10G0000320200.v1	Pl10	50604085	50606386				x				Phvul.010G127500	Phvul.010G127500
Pl10G0000321600.v1	Pl10	50762281	50764656							x	Phvul.010G129000	Phvul.010G129000
Pl10G0000323900.v1	Pl10	50995434	50996280		x						Phvul.010G131800	Phvul.010G131800
Pl10G0000324000.v1	Pl10	51003546	51004872		x						Phvul.010G131800	Phvul.010G131800
Pl10G0000324100.v1	Pl10	51025300	51026625		x						Phvul.010G131800	Phvul.010G131800
Pl10G0000324200.v1	Pl10	51048630	51049354		x						Phvul.010G131800	Phvul.010G131800
Pl10G0000324400.v1	Pl10	51080579	51081304		x							Phvul.010G131600
Pl10G0000324500.v1	Pl10	51086082	51087351		x						Phvul.010G131800	Phvul.010G131800
Pl10G0000324800.v1	Pl10	51093298	51095402		x						Phvul.010G131800	Phvul.010G131800
Pl10G0000324900.v1	Pl10	51100579	51104306		x	x	x				Phvul.010G131900	Phvul.010G131200, Phvul.010G131500, Phvul.010G131900
Pl10G0000325000.v1	Pl10	51104868	51108925		x	x	x				Phvul.010G132200	Phvul.010G132200	Meziadi et al. 2016; Richard et al. 2018
Pl10G0000327100.v1	Pl10	51354676	51358647							x	Phvul.010G134200	Phvul.010G134200
Pl10G0000329300.v1	Pl10	51623456	51628386				x				Phvul.010G136700	Phvul.010G136700
Pl10G0000329400.v1	Pl10	51639553	51647021		x	x	x				Phvul.010G136700	Phvul.010G136700	Meziadi et al. 2016; Richard et al. 2018
Pl10G0000329500.v1	Pl10	51648631	51658493		x	x	x				Phvul.010G136800	Phvul.010G136800	Meziadi et al. 2016; Richard et al. 2018
Pl10G0000331700.v1	Pl10	51815271	51822050							x	Phvul.010G138900	Phvul.010G138900
Pl10G0000333000.v1	Pl10	51926974	51931445							x	Phvul.010G140200	Phvul.010G140200
Pl10G0000335400.v1	Pl10	52173817	52175447							x	Phvul.010G143100	Phvul.010G143100
Pl10G0000335500.v1	Pl10	52180673	52183909				x				Phvul.010G143100	Phvul.010G143100
Pl10G0000337500.v1	Pl10	52356256	52363804							x	Phvul.010G145100	Phvul.010G145100
Pl10G0000338700.v1	Pl10	52460728	52467765						x		Phvul.010G146200	Phvul.005G166900, Phvul.010G146200
Pl10G0000340900.v1	Pl10	52650648	52655942						x		Phvul.010G148700	Phvul.010G148700
Pl10G0000341500.v1	Pl10	52680800	52685290							x	Phvul.010G149300	Phvul.010G149300
Pl10G0000348800.v1	Pl10	53197299	53200585							x	Phvul.010G156500	Phvul.010G156500
Pl10G0000349800.v1	Pl10	53273897	53284065				x				Phvul.010G157600	Phvul.010G157600
Pl10G0000351600.v1	Pl10	53444526	53446634				x				Phvul.010G159100	Phvul.010G159100
Pl10G0000351700.v1	Pl10	53451331	53453654				x				Phvul.010G159200	Phvul.010G159200
Pl10G0000353400.v1	Pl10	53572612	53574855							x	Phvul.010G160900	Phvul.010G160900
Pl10G0000353600.v1	Pl10	53594863	53597457					x			Phvul.010G161100	Phvul.010G161100
Pl10G0000357200.v1	Pl10	53802976	53805169							x	Phvul.010G165000	Phvul.010G165000
Pl10G0000357400.v1	Pl10	53818092	53823838				x				Phvul.010G165200	Phvul.010G165200
Pl11G0000001400.v1	Pl11	90541	94731							x	Phvul.007G280200	Phvul.007G280200
Pl11G0000002200.v1	Pl11	135085	136353							x	Phvul.007G279600	Phvul.007G279600
Pl11G0000006200.v1	Pl11	417778	420135							x	Phvul.011G003100	Phvul.011G003100
Pl11G0000006300.v1	Pl11	420677	424687				x				Phvul.011G003200	Phvul.011G003200
Pl11G0000008000.v1	Pl11	530176	534008							x	Phvul.011G004700	Phvul.011G004700
Pl11G0000012200.v1	Pl11	796555	799530				x				Phvul.011G007900	Phvul.011G007900
Pl11G0000012400.v1	Pl11	803080	806002				x				Phvul.011G008100	Phvul.011G007800
Pl11G0000012800.v1	Pl11	824980	827563				x				Phvul.011G007400	Phvul.011G007400
Pl11G0000013000.v1	Pl11	859511	863069				x				Phvul.011G007200	Phvul.011G007200
Pl11G0000015100.v1	Pl11	1031415	1034143							x	Phvul.011G013100	Phvul.011G013100
Pl11G0000016300.v1	Pl11	1134850	1137606			x					Phvul.011G014300	Phvul.011G014300
Pl11G0000016400.v1	Pl11	1146822	1149607			x					Phvul.011G014500	Phvul.011G014500
Pl11G0000016500.v1	Pl11	1156995	1159748			x						Phvul.011G014300
Pl11G0000016700.v1	Pl11	1173612	1176389			x					Phvul.011G014500	Phvul.011G014500
Pl11G0000016800.v1	Pl11	1181968	1184850			x					Phvul.011G014500	Phvul.011G014500
Pl11G0000016900.v1	Pl11	1186323	1189064			x						Phvul.011G014300
Pl11G0000017000.v1	Pl11	1193090	1195957			x					Phvul.011G014500	Phvul.011G014500
Pl11G0000032800.v1	Pl11	2403854	2411293				x
Pl11G0000033800.v1	Pl11	2481786	2484202				x				Phvul.011G030000
Pl11G0000037600.v1	Pl11	2809807	2813982				x				Phvul.011G033000	Phvul.011G033000
Pl11G0000040300.v1	Pl11	3053855	3057490							x	Phvul.011G035600	Phvul.011G035600
Pl11G0000049000.v1	Pl11	3577332	3581320				x				Phvul.011G042000	Phvul.011G042000
Pl11G0000049100.v1	Pl11	3584781	3588329				x				Phvul.011G042100	Phvul.011G042100
Pl11G0000052500.v1	Pl11	3832164	3836166							x	Phvul.011G045600	Phvul.011G045600
Pl11G0000061700.v1	Pl11	4508967	4512587							x	Phvul.011G054300	Phvul.011G054300
Pl11G0000065400.v1	Pl11	4868480	4869574				x				Phvul.011G057600	Phvul.011G057600
Pl11G0000065900.v1	Pl11	4912932	4914191							x	Phvul.011G057900	Phvul.011G057900
Pl11G0000068500.v1	Pl11	5149703	5153940							x	Phvul.011G060100	Phvul.011G060100
Pl11G0000072600.v1	Pl11	5455026	5458081							x	Phvul.011G063900	Phvul.011G063900
Pl11G0000072700.v1	Pl11	5462604	5466335							x	Phvul.011G064000	Phvul.011G064000
Pl11G0000073100.v1	Pl11	5491459	5499111							x	Phvul.011G064400	Phvul.011G064400
Pl11G0000076700.v1	Pl11	5724313	5733916				x				Phvul.011G067400	Phvul.011G067400
Pl11G0000079200.v1	Pl11	5944156	5946993							x	Phvul.011G069600	Phvul.011G069600
Pl11G0000080200.v1	Pl11	6046100	6050623							x	Phvul.011G070500	Phvul.011G070500
Pl11G0000086500.v1	Pl11	6741052	6743059				x				Phvul.011G078500	Phvul.011G078500
Pl11G0000087900.v1	Pl11	6869101	6875875						x		Phvul.011G079800	Phvul.011G079800
Pl11G0000090000.v1	Pl11	7052960	7057939							x	Phvul.011G081200	Phvul.011G081200	Schmutz et al. 2014
Pl11G0000090600.v1	Pl11	7116582	7118474							x	Phvul.011G081800	Phvul.011G081800	Schmutz et al. 2014
Pl11G0000100500.v1	Pl11	8314409	8317814							x	Phvul.011G090900	Phvul.011G090900
Pl11G0000104900.v1	Pl11	8805960	8809632				x				Phvul.011G093800	Phvul.011G093800, Phvul.011G094000
Pl11G0000112700.v1	Pl11	9724136	9732930							x	Phvul.011G098200	Phvul.011G098200
Pl11G0000117800.v1	Pl11	10465081	10468610					x			Phvul.011G101900	Phvul.011G101900
Pl11G0000122900.v1	Pl11	11018093	11022523						x		Phvul.011G104700	Phvul.005G114600, Phvul.011G104700
Pl11G0000127200.v1	Pl11	11689177	11693821							x	Phvul.011G108700	Phvul.011G108700
Pl11G0000127500.v1	Pl11	11739947	11742926				x				Phvul.011G108900	Phvul.011G108900
Pl11G0000128100.v1	Pl11	11781627	11784119							x	Phvul.011G109100	Phvul.011G109100
Pl11G0000136300.v1	Pl11	12789788	12799201				x					Phvul.005G176400, Phvul.010G130100, Phvul.011G112700
Pl11G0000161200.v1	Pl11	15877106	15881994							x		Phvul.011G119100
Pl11G0000162900.v1	Pl11	16147189	16148463							x		Phvul.011G119200
Pl11G0000170700.v1	Pl11	17513440	17514678				x					Phvul.011G115300
Pl11G0000230600.v1	Pl11	27293057	27293947			x
Pl11G0000259100.v1	Pl11	32080452	32084385				x					Phvul.011G123500
Pl11G0000278000.v1	Pl11	34244062	34249128							x	Phvul.011G128000	Phvul.011G128000
Pl11G0000293500.v1	Pl11	35921171	35924315		x	x	x
Pl11G0000294800.v1	Pl11	36055361	36059216		x	x	x
Pl11G0000295100.v1	Pl11	36076292	36076920		x
Pl11G0000295500.v1	Pl11	36146329	36151152			x	x
Pl11G0000295600.v1	Pl11	36159673	36160450		x
Pl11G0000305400.v1	Pl11	37357538	37361224		x	x	x				Phvul.011G140300	Phvul.011G140300, Phvul.011G140400
Pl11G0000305500.v1	Pl11	37378262	37378645		x						Phvul.011G140400	Phvul.011G140300, Phvul.011G140400	Meziadi et al. 2016
Pl11G0000309100.v1	Pl11	37865400	37868984							x	Phvul.011G142200	Phvul.011G142200
Pl11G0000310400.v1	Pl11	37979334	37983728		x	x
Pl11G0000317200.v1	Pl11	38856711	38860842							x	Phvul.011G147000	Phvul.011G147000
Pl11G0000317700.v1	Pl11	38890113	38897236							x	Phvul.011G147100	Phvul.011G147100
Pl11G0000320100.v1	Pl11	39234940	39238544							x	Phvul.011G148700	Phvul.011G148700
Pl11G0000321200.v1	Pl11	39462293	39464286		x						Phvul.011G149200	Phvul.011G149200
Pl11G0000321400.v1	Pl11	39497457	39502715			x					Phvul.011G149400	Phvul.011G149400	Meziadi et al. 2016; Richard et al. 2018
Pl11G0000321500.v1	Pl11	39511542	39516015							x	Phvul.011G149500	Phvul.011G149500
Pl11G0000322900.v1	Pl11	39729269	39732529							x	Phvul.011G150100	Phvul.011G150100
Pl11G0000323000.v1	Pl11	39737295	39740590							x	Phvul.011G150200	Phvul.011G150200
Pl11G0000323100.v1	Pl11	39747562	39750909							x	Phvul.011G150400	Phvul.011G150400
Pl11G0000323400.v1	Pl11	39812097	39823103							x	Phvul.011G150900	Phvul.003G099300, Phvul.011G150900, Phvul.011G151000
Pl11G0000323900.v1	Pl11	39902196	39903562							x	Phvul.011G151800	Phvul.011G151800
Pl11G0000324500.v1	Pl11	39997557	40000954							x	Phvul.011G152000	Phvul.011G152000
Pl11G0000324600.v1	Pl11	40009141	40013705							x	Phvul.011G152100	Phvul.011G152100
Pl11G0000324900.v1	Pl11	40033455	40037330							x	Phvul.011G152200	Phvul.011G152200
Pl11G0000325100.v1	Pl11	40069699	40073096							x	Phvul.011G152300	Phvul.011G152300
Pl11G0000325200.v1	Pl11	40080967	40084088							x	Phvul.011G152400	Phvul.011G152400
Pl11G0000325500.v1	Pl11	40144640	40148499							x	Phvul.011G152700	Phvul.011G152700
Pl11G0000330200.v1	Pl11	40866719	40870494				x
Pl11G0000332000.v1	Pl11	41078934	41082383							x	Phvul.011G156200	Phvul.011G156200
Pl11G0000332800.v1	Pl11	41149799	41150419						x		Phvul.011G156800	Phvul.011G156800
Pl11G0000336800.v1	Pl11	41607969	41612049							x	Phvul.011G159700	Phvul.011G159700
Pl11G0000338900.v1	Pl11	41940439	41943865				x				Phvul.011G161000	Phvul.011G161000
Pl11G0000339400.v1	Pl11	42001567	42004573				x
Pl11G0000339600.v1	Pl11	42013873	42014712							x
Pl11G0000342700.v1	Pl11	42451543	42460616							x	Phvul.011G164700	Phvul.011G164700
Pl11G0000345500.v1	Pl11	42746785	42751357				x				Phvul.011G166400	Phvul.011G166400
Pl11G0000345800.v1	Pl11	42775795	42779418				x
Pl11G0000348000.v1	Pl11	42995147	43007572				x				Phvul.011G167800	Phvul.011G167800
Pl11G0000348600.v1	Pl11	43053286	43054669							x	Phvul.011G168400	Phvul.011G168400
Pl11G0000348700.v1	Pl11	43056153	43058297							x	Phvul.011G168400	Phvul.011G168400
Pl11G0000350800.v1	Pl11	43291077	43295505							x	Phvul.011G169600	Phvul.011G169600
Pl11G0000351000.v1	Pl11	43315505	43333682				x				Phvul.011G169300	Phvul.011G169300
Pl11G0000351200.v1	Pl11	43342868	43350884				x
Pl11G0000351300.v1	Pl11	43355925	43361689				x				Phvul.011G169300	Phvul.011G169300
Pl11G0000351400.v1	Pl11	43370131	43371552				x				Phvul.011G172000	Phvul.011G172000
Pl11G0000354600.v1	Pl11	43722718	43724534							x	Phvul.011G175200	Phvul.011G175200
Pl11G0000354700.v1	Pl11	43730064	43732968							x	Phvul.011G175200	Phvul.011G175200
Pl11G0000355100.v1	Pl11	43756900	43757289							x	Phvul.011G175700	Phvul.011G175700
Pl11G0000355500.v1	Pl11	43847242	43850636							x	Phvul.011G175700	Phvul.011G175700
Pl11G0000355600.v1	Pl11	43853946	43855166							x	Phvul.011G175600	Phvul.011G175600
Pl11G0000355700.v1	Pl11	43855787	43857250							x	Phvul.011G176400	Phvul.011G176400
Pl11G0000356100.v1	Pl11	43902713	43914761							x	Phvul.011G176800	Phvul.011G176800
Pl11G0000362300.v1	Pl11	44584570	44586832							x	Phvul.011G180600	Phvul.011G180600
Pl11G0000363000.v1	Pl11	44709120	44713119							x	Phvul.011G181900	Phvul.011G181900
Pl11G0000364100.v1	Pl11	44810796	44814338				x				Phvul.011G182300	Phvul.011G182300
Pl11G0000367300.v1	Pl11	45076169	45082117				x				Phvul.011G185500	Phvul.011G185500
Pl11G0000373500.v1	Pl11	45598206	45603194			x					Phvul.011G191600	Phvul.011G191600
Pl11G0000373600.v1	Pl11	45603987	45610063							x	Phvul.011G191900	Phvul.011G191900
Pl11G0000373900.v1	Pl11	45626912	45630532			x					Phvul.011G192100	Phvul.011G192100	Chen et al. 2018; Meziadi et al. 2016; Richard et al. 2018
Pl11G0000374000.v1	Pl11	45631690	45633206			x					Phvul.011G192200	Phvul.011G192200
Pl11G0000374100.v1	Pl11	45637981	45641752			x	x				Phvul.011G192400	Phvul.011G192400
Pl11G0000374200.v1	Pl11	45646909	45648963			x						Phvul.011G193500
Pl11G0000374300.v1	Pl11	45649205	45650230				x				Phvul.011G192500	Phvul.011G192500
Pl11G0000374400.v1	Pl11	45660493	45664059			x					Phvul.011G192600	Phvul.011G192600
Pl11G0000374800.v1	Pl11	45691468	45695161			x
Pl11G0000374900.v1	Pl11	45697962	45701906			x					Phvul.011G193100	Phvul.011G193100
Pl11G0000375000.v1	Pl11	45703009	45705981							x	Phvul.011G193200	Phvul.011G193200
Pl11G0000375300.v1	Pl11	45721050	45724586			x	x				Phvul.011G193500	Phvul.011G193500
Pl11G0000375400.v1	Pl11	45726904	45727453							x	Phvul.011G193700	Phvul.011G193700
Pl11G0000375500.v1	Pl11	45736134	45739685			x					Phvul.011G193500	Phvul.011G193500
Pl11G0000375600.v1	Pl11	45741458	45742264							x	Phvul.011G194100	Phvul.011G194100
Pl11G0000375700.v1	Pl11	45744904	45748573							x	Phvul.011G194200	Phvul.011G194200
Pl11G0000375800.v1	Pl11	45751027	45761985							x	Phvul.011G194300	Phvul.011G194300, Phvul.011G194400
Pl11G0000375900.v1	Pl11	45763721	45766427							x	Phvul.011G194500	Phvul.011G194500
Pl11G0000376000.v1	Pl11	45767975	45772279							x	Phvul.011G194600	Phvul.011G194600, Phvul.011G194700
Pl11G0000376100.v1	Pl11	45775875	45781966							x	Phvul.011G194700	Phvul.011G194700
Pl11G0000377300.v1	Pl11	45919519	45923016			x						Phvul.011G195400
Pl11G0000377400.v1	Pl11	45926543	45928111				x				Phvul.011G195300	Phvul.011G195300
Pl11G0000377500.v1	Pl11	45928716	45931474			x	x				Phvul.011G195400	Phvul.011G195400
Pl11G0000377600.v1	Pl11	45938613	45942218			x
Pl11G0000377700.v1	Pl11	45946577	45950131			x					Phvul.011G195400	Phvul.011G195400
Pl11G0000377800.v1	Pl11	45954648	45956762				x					Phvul.011G195200
Pl11G0000378000.v1	Pl11	45963629	45964428			x
Pl11G0000378100.v1	Pl11	45966846	45970457			x					Phvul.011G195500	Phvul.011G195500
Pl11G0000378200.v1	Pl11	45971152	45975251			x					Phvul.011G196000	Phvul.011G196000
Pl11G0000378300.v1	Pl11	45975429	45979817		x	x	x				Phvul.011G195800	Phvul.011G181400, Phvul.011G195800	Chen et al. 2018; Meziadi et al. 2016; Richard et al. 2018
Pl11G0000378400.v1	Pl11	45984192	45988735			x	x				Phvul.011G196000	Phvul.011G196000	Chen et al. 2018; Meziadi et al. 2016; Richard et al. 2018
Pl11G0000378500.v1	Pl11	45991755	45992060				x				Phvul.011G196000	Phvul.011G196000	Chen et al. 2018; Meziadi et al. 2016; Richard et al. 2018
Pl11G0000378600.v1	Pl11	45996466	45998180							x	Phvul.011G196200	Phvul.011G196200
Pl11G0000379900.v1	Pl11	46115970	46121266			x
Pl11G0000380000.v1	Pl11	46121455	46121982				x				Phvul.011G198000	Phvul.011G198000
Pl11G0000380200.v1	Pl11	46125005	46125815							x		Phvul.011G197500, Phvul.011G197700, Phvul.011G198500, Phvul.011G200400
Pl11G0000380300.v1	Pl11	46137543	46139756			x
Pl11G0000380400.v1	Pl11	46139925	46140401				x				Phvul.011G198800	Phvul.011G198800
Pl11G0000380500.v1	Pl11	46140600	46144858				x				Phvul.011G198000	Phvul.011G198000
Pl11G0000380600.v1	Pl11	46145621	46146604							x		Phvul.011G197500, Phvul.011G197700, Phvul.011G198500, Phvul.011G200400
Pl11G0000380700.v1	Pl11	46147837	46148388							x	Phvul.011G198500	Phvul.011G198500
Pl11G0000380800.v1	Pl11	46157806	46161247			x						Phvul.011G197900
Pl11G0000380900.v1	Pl11	46164178	46167140							x	Phvul.011G198500	Phvul.011G198500
Pl11G0000381000.v1	Pl11	46178486	46181941			x	x					Phvul.011G197900
Pl11G0000381200.v1	Pl11	46185856	46190757			x						Phvul.011G198000	Chen et al. 2018; Meziadi et al. 2016; Richard et al. 2018
Pl11G0000381400.v1	Pl11	46201834	46205805			x	x					Phvul.011G197800	Chen et al. 2018; Meziadi et al. 2016; Richard et al. 2018
Pl11G0000381500.v1	Pl11	46207401	46208980			x
Pl11G0000383800.v1	Pl11	46399989	46413947			x	x
Pl11G0000383900.v1	Pl11	46419965	46422718				x
Pl11G0000384700.v1	Pl11	46502787	46506614			x					Phvul.011G202900	Phvul.011G202900
Pl11G0000384800.v1	Pl11	46520485	46522342			x
Pl11G0000384900.v1	Pl11	46522510	46524159				x				Phvul.011G202900	Phvul.011G202900
Pl11G0000385000.v1	Pl11	46528652	46532497				x					Phvul.011G201100
Pl11G0000385100.v1	Pl11	46537631	46539594				x				Phvul.011G202900	Phvul.011G202900
Pl11G0000385200.v1	Pl11	46543280	46547802			x
Pl11G0000385300.v1	Pl11	46548017	46548259				x				Phvul.011G202900	Phvul.011G202900
Pl11G0000385400.v1	Pl11	46548457	46554334				x				Phvul.011G202900	Phvul.011G202900
Pl11G0000385500.v1	Pl11	46558475	46562158			x						Phvul.011G202300
Pl11G0000385600.v1	Pl11	46565179	46567489				x
Pl11G0000385700.v1	Pl11	46567741	46568658				x
Pl11G0000385900.v1	Pl11	46575799	46578060			x						Phvul.011G202300
Pl11G0000386000.v1	Pl11	46578132	46579433				x					Phvul.011G202300
Pl11G0000386100.v1	Pl11	46582460	46585942				x
Pl11G0000386500.v1	Pl11	46601227	46604862			x						Phvul.011G202300
Pl11G0000386600.v1	Pl11	46607889	46610187				x
Pl11G0000386800.v1	Pl11	46611069	46612300			x						Phvul.011G202400
Pl11G0000387000.v1	Pl11	46617766	46621401			x						Phvul.011G202300
Pl11G0000387100.v1	Pl11	46624270	46627752			x
Pl11G0000387300.v1	Pl11	46636737	46640233			x	x				Phvul.011G202900	Phvul.011G202900
Pl11G0000387400.v1	Pl11	46647991	46650046			x						Phvul.011G203000
Pl11G0000387500.v1	Pl11	46652141	46655689			x
Pl11G0000387700.v1	Pl11	46667209	46671185		x		x					Phvul.011G181400	Richard et al. 2018
Pl11G0000388100.v1	Pl11	46691495	46695307			x						Phvul.011G202900
Pl11G0000388400.v1	Pl11	46719012	46720094			x
Pl11G0000388600.v1	Pl11	46721809	46724423			x	x
Pl11G0000388700.v1	Pl11	46726599	46730021			x
Pl11G0000388800.v1	Pl11	46731684	46735139			x
Pl11G0000388900.v1	Pl11	46736121	46736366				x
Pl11G0000389000.v1	Pl11	46742365	46745658			x
Pl11G0000389100.v1	Pl11	46773614	46788379			x					Phvul.011G202900	Phvul.011G202900
Pl11G0000389200.v1	Pl11	46780105	46781687				x
Pl11G0000389600.v1	Pl11	46802450	46813111						x		Phvul.011G203400	Phvul.011G203400
Pl11G0000396300.v1	Pl11	47419984	47422635							x	Phvul.011G210400	Phvul.011G210400
Pl11G0000399500.v1	Pl11	47712288	47713391				x				Phvul.011G212100	Phvul.011G212100
Pl11G0000400600.v1	Pl11	47784973	47787881							x	Phvul.011G214400	Phvul.011G214400
