# Supplementary material for: Comprehensive genomic resources related to domestication and crop improvement traits in Lima bean
Source: Nat Commun. 2021 Jan 29;12:702. doi: 10.1038/s41467-021-20921-1 (PMC7846787; doi:10.1038/s41467-021-20921-1)
Supplement: Supplementary file 9 — Supplementary Data 5 [file 41467_2021_20921_MOESM9_ESM.xlsx]

## Sheet: Sheet1
		Geographical information			Structure								FineStructure
Sample ID	W/D	Country	Region	Inferred population (K=12)	Population K=6	Score AI	Score DOM-MI	Score MII-N	Score AII	Score WILD-MI	Score MII-S	Row Sum	Group Number	Group inferred from tree
G25559-COR	Domesticated	Mexico	Chiapas	DOM-MII	MII-S	0	0	0.0281	0	0	0.9718	0.9999	52	DOM_MII
G25303-COR	Domesticated	Mexico	Chiapas	DOM-MII	MII-S	0	0.0494	0.1379	0.0328	0.0043	0.7756	1	0	DOM_NOT_ASSIGNED
G25750-COR	Domesticated	Mexico	Campeche	DOM-MII	MII-S	0	0	0.0775	0.1317	0.0001	0.7908	1.0001	23	DOM_MII
G25385B-COR	Domesticated	Costa Rica	San Jose	DOM-MII	MII-S	0	0	0.0003	0.035	0	0.9647	1	11	DOM_MII
G25388-COR	Domesticated	Costa Rica	San Jose	DOM-MII	MII-Admixed	0	0	0.3255	0	0	0.6744	0.9999	0	DOM_NOT_ASSIGNED
G25596A-COR	Domesticated	Costa Rica	San Jose	DOM-MII	MII-Admixed	0	0.1705	0.4216	0.0001	0.0001	0.4077	1	0	DOM_NOT_ASSIGNED
G25391B-COR	Domesticated	Costa Rica	San Jose	DOM-MII	MII-N	0	0.0002	0.9262	0.0001	0.0575	0.0159	0.9999	79	DOM_MII
G25195-COR	Domesticated	Guatemala	Jalapa	DOM-MII	MII-N	0	0	0.9672	0.005	0	0.0277	0.9999	17	DOM_MII
G26306-COR	Domesticated	Guatemala	Chiquimula	DOM-MII	MII-N	0	0.009	0.9584	0.0001	0.0002	0.0323	1	86	DOM_MII
G27289-COR	Domesticated	Cuba	Ciego De Avila	DOM-MII	MII-N	0	0	0.945	0	0	0.055	1	0	DOM_NOT_ASSIGNED
G25987-COR	Domesticated	Bolivia	Chuquisaca	DOM-MII	Admixed	0.2914	0.0006	0.2177	0.1822	0.2908	0.0174	1.0001	62	DOM_MI
G25581-COR	Domesticated	Bolivia	Santa Cruz	DOM-MII	MII-S	0.0325	0	0.0735	0.1169	0.0001	0.777	1	16	DOM_MII
G25108-ELS	Domesticated	Brazil	Minas Gerais	DOM-MII	MII-S	0	0	0.0915	0.1316	0	0.7768	0.9999	23	DOM_MII
G26002-ELS	Domesticated	Brazil	Ceara	DOM-MII	MII-S	0	0	0.0742	0.133	0.0001	0.7928	1.0001	23	DOM_MII
G26672-COR	Domesticated	Ecuador	Carchi	DOM-MII	MII-S	0	0.0209	0.0076	0.0083	0.0001	0.9632	1.0001	35	DOM_MII
G26620-ELS	Domesticated	Colombia	Nariño	DOM-MII	AII	0.0004	0.0005	0.0013	0.9245	0.0001	0.0732	1	33	DOM_AII
G26614-ELS	Domesticated	Colombia	Boyaca	DOM-MII	AII	0.1463	0.0001	0.0003	0.8523	0.0001	0.0009	1	59	DOM_AII
G26656-COR	Domesticated	Colombia	Valle Del Cauca	DOM-MII	Admixed	0.3002	0.0003	0.1989	0.1862	0.2902	0.0242	1	62	DOM_MI
G25594-ELS	Domesticated	United States	Maryland	DOM-AI	AI	0.9999	0	0	0	0	0	0.9999	44	DOM_AI
G25167B-ELS	Domesticated	United States	California	DOM-AI	AI	0.921	0.0614	0	0	0.0176	0	1	44	DOM_AI
G25277-COR	Domesticated	El Salvador	Cuscatlan	DOM-AI	AI	0.9896	0	0.0031	0	0	0.0073	1	85	DOM_AI
G25540-ELS	Domesticated	Argentina	Salta	DOM-AI	AI	0.9999	0	0	0	0	0	0.9999	85	DOM_AI
G25981-ELS	Domesticated	Bolivia	Chuquisaca	DOM-AI	AI	0.9888	0	0.0018	0.0001	0	0.0093	1	85	DOM_AI
G27337-ELS	Domesticated	Bolivia	Chuquisaca	DOM-AI	AI	0.9998	0	0	0	0	0	0.9998	85	DOM_AI
G25172-ELS	Domesticated	Peru	Ica	DOM-AI	AI	0.94	0.0595	0	0	0.0004	0	0.9999	44	DOM_AI
G25420-ELS	Domesticated	Peru	Piura	DOM-AI	AI	0.9999	0	0	0	0	0	0.9999	44	DOM_AI
G25909-ELS	Domesticated	Peru	Cajamarca	DOM-AI	AI	0.9999	0	0	0	0	0	0.9999	63	DOM_AI
G26184-ELS	Domesticated	Peru	Ica	DOM-AI	AI	0.9096	0.09	0	0	0.0003	0	0.9999	44	DOM_AI
G26480-ELS	Domesticated	Ecuador	Imbabura	DOM-AI	AI	1	0	0	0	0	0	1	65	DOM_AI
G26578-COR	Domesticated	Ecuador	Pichincha	DOM-AI	AI	0.9999	0	0	0	0	0	0.9999	65	DOM_AI
G26659-ELS	Domesticated	Ecuador	Imbabura	DOM-AI	AI	0.9999	0	0	0	0	0	0.9999	37	DOM_AI
G25702-ELS	Domesticated	Colombia	Nariño	DOM-AI	AI	0.9999	0	0	0	0	0	0.9999	64	DOM_AI
G25900-ELS	Domesticated	Colombia	Nariño	DOM-AI	AI	1	0	0	0	0	0	1	64	DOM_AI
G25901-ELS	Domesticated	Colombia	Nariño	DOM-AI	AI	0.9998	0	0	0	0.0001	0	0.9999	64	DOM_AI
G25904-ELS	Domesticated	Colombia	Nariño	DOM-AI	AI	1	0	0	0	0	0	1	63	DOM_AI
G25907-ELS	Domesticated	Colombia	Nariño	DOM-AI	AI	1	0	0	0	0	0	1	37	DOM_AI
G25910-ELS	Domesticated	Colombia	Nariño	DOM-AI	AI	0.9999	0	0	0	0	0	0.9999	67	DOM_AI
G26622-ELS	Domesticated	Colombia	Nariño	DOM-AI	AI	1	0	0	0	0	0	1	98	DOM_AI
G25908-ELS	Domesticated	Colombia	Putumayo	DOM-AI	AI	0.9999	0	0	0	0	0	0.9999	67	DOM_AI
G25400-ELS	Domesticated	Colombia	Cauca	DOM-AI	AI	0.9947	0.0049	0	0	0.0003	0	0.9999	44	DOM_AI
G26520-ELS	Domesticated	Colombia	Cauca	DOM-AI	AI	0.9999	0	0	0	0	0	0.9999	65	DOM_AI
G25810-ELS	Domesticated	Colombia	Valle Del Cauca	DOM-AI	AI	0.9988	0.0005	0	0.0001	0.0006	0	1	64	DOM_AI
G26507-ELS	Domesticated	Colombia	Valle Del Cauca	DOM-AI	AI	0.9999	0	0	0	0	0	0.9999	98	DOM_AI
G26510-ELS	Domesticated	Colombia	Valle Del Cauca	DOM-AI	AI	0.9999	0	0	0	0	0	0.9999	9	DOM_AI
G26639-ELS	Domesticated	Colombia	Antioquia	DOM-AI	AI	0.9999	0	0	0	0	0	0.9999	98	DOM_AI
G26651-ELS	Domesticated	Colombia	Antioquia	DOM-AI	AI	0.9999	0	0	0	0	0	0.9999	98	DOM_AI
G26703-ELS	Domesticated	Colombia	Caldas	DOM-AI	AI	0.9999	0	0	0	0	0	0.9999	98	DOM_AI
G26623-ELS	Domesticated	Colombia	Risaralda	DOM-AI	AI	0.9999	0	0	0	0	0	0.9999	98	DOM_AI
G25804-ELS	Domesticated	Colombia	Huila	DOM-AI	AI	0.9998	0.0001	0	0	0.0001	0	1	64	DOM_AI
G26488-ELS	Domesticated	Colombia	Huila	DOM-AI	AI	0.9998	0.0001	0	0	0.0001	0	1	37	DOM_AI
G26617-ELS	Domesticated	Colombia	Boyaca	DOM-AI	AI	0.9999	0	0	0	0	0	0.9999	64	DOM_AI
G26505-COR	Domesticated	Colombia	Cundinamarca	DOM-AI	AI	0.99	0.0063	0.0002	0.0032	0.0003	0.0001	1.0001	9	DOM_AI
G26685-ELS	Wild	Argentina	Salta	WILD-AI	MII-S	0.0001	0	0.1183	0.0501	0	0.8314	0.9999	0	WILD_NOT_ASSIGNED
G25913-COR	Wild	Peru	Cajamarca	WILD-AI	MII-N	0	0.0254	0.9597	0	0.0001	0.0148	1	0	WILD_NOT_ASSIGNED
G25914-ELS	Wild	Peru	Cajamarca	WILD-AI	AI	0.9965	0.0003	0.001	0.0012	0.0006	0.0003	0.9999	43	WILD_AI
G25915-ELS	Wild	Peru	Cajamarca	WILD-AI	AI	0.9992	0.0001	0.0001	0.0001	0.0003	0.0001	0.9999	63	WILD_AI
G26348-ELS	Wild	Peru	Cajamarca	WILD-AI	AI	0.9998	0	0	0	0	0	0.9998	28	WILD_AI
G26459-ELS	Wild	Ecuador	Loja	WILD-AI	AI	0.9998	0	0	0	0.0001	0	0.9999	21	WILD_AI
G26460-COR	Wild	Ecuador	Loja	WILD-AI	AI	0.9999	0	0	0	0	0	0.9999	21	WILD_AI
G26468-COR	Wild	Ecuador	Bolivar	WILD-AI	AI	0.9099	0.0001	0.001	0.0353	0.0537	0.0001	1.0001	46	WILD_AI
G26545-COR	Wild	Ecuador	Loja	WILD-AI	AI	0.9999	0	0	0	0	0	0.9999	28	WILD_AI
G26608-ELS	Wild	Ecuador	El Oro	WILD-AI	AI	0.9999	0	0	0	0	0	0.9999	28	WILD_AI
G26609-ELS	Wild	Ecuador	Azuay	WILD-AI	AI	0.9936	0.0004	0.0001	0.0001	0.0058	0	1	43	WILD_AI
G26721-COR	Wild	Ecuador	Azuay	WILD-AI	MII-N	0	0	0.9672	0.0263	0	0.0065	1	0	WILD_NOT_ASSIGNED
G26613-ELS	Wild	Colombia	Boyaca	WILD-AI	MII-S	0.01	0	0.1454	0.0209	0	0.8236	0.9999	0	WILD_NOT_ASSIGNED
G26704-ELS	Wild	Colombia	Caldas	WILD-AI	MII-S	0.0001	0.0337	0.001	0.2587	0.0004	0.7062	1.0001	4	WILD_MII
G26547-ELS-2	Wild	Peru	Junin	WILD-AII	AII	0.0001	0.0003	0.0031	0.9417	0.0004	0.0545	1.0001	33	WILD_AII
G26687-ELS	Wild	Colombia	Cundinamarca	WILD-AII	AII	0.0001	0.0002	0.0001	0.9499	0.0005	0.0492	1	33	WILD_AII
G26688-COR	Wild	Colombia	Cundinamarca	WILD-AII	AII	0	0	0.0001	0.9861	0	0.0137	0.9999	59	WILD_AII
G26737-COR	Wild	Colombia	Cundinamarca	WILD-AII	AII	0	0	0.0001	0.9477	0	0.0521	0.9999	33	WILD_AII
G26697-ELS	Wild	Colombia	Boyaca	WILD-AII	Admixed	0	0.0002	0.4495	0.5483	0.0001	0.0018	0.9999	0	WILD_NOT_ASSIGNED
G26615-ELS-2	Wild	Colombia	Boyaca	WILD-AII	AII	0.0379	0	0.0001	0.9598	0	0.0021	0.9999	59	WILD_AII
G26616-ELS	Wild	Colombia	Boyaca	WILD-AII	AII	0.0006	0	0.0002	0.9988	0	0.0004	1	59	WILD_AII
G26618A-ELS	Wild	Colombia	Boyaca	WILD-AII	AII	0	0	0.0036	0.9877	0	0.0087	1	59	WILD_AII
G26689-ELS	Wild	Colombia	Boyaca	WILD-AII	AII	0	0.0929	0.0001	0.9058	0.0009	0.0003	1	6	WILD-AII
G26690-ELS	Wild	Colombia	Boyaca	WILD-AII	AII	0	0.1266	0.0001	0.8728	0.0004	0.0001	1	6	WILD-AII
G26691-ELS	Wild	Colombia	Boyaca	WILD-AII	AII	0	0	0	0.9999	0	0	0.9999	59	WILD_AII
G26692-COR	Wild	Colombia	Boyaca	WILD-AII	AII	0	0	0.0035	0.9893	0	0.0071	0.9999	59	WILD_AII
G26693-ELS	Wild	Colombia	Boyaca	WILD-AII	AII	0	0	0.0005	0.9912	0	0.0083	1	40	WILD_AII
G26694-ELS	Wild	Colombia	Boyaca	WILD-AII	AII	0	0	0	0.9999	0	0	0.9999	40	WILD_AII
G26695-ELS	Wild	Colombia	Boyaca	WILD-AII	AII	0	0	0	0.9999	0	0	0.9999	40	WILD_AII
G26696-ELS	Wild	Colombia	Boyaca	WILD-AII	AII	0	0.0019	0.0217	0.9736	0.0017	0.0011	1	40	WILD_AII
G26698-ELS	Wild	Colombia	Boyaca	WILD-AII	AII	0	0	0	0.9999	0	0	0.9999	40	WILD_AII
G26699-COR	Wild	Colombia	Boyaca	WILD-AII	AII	0	0	0.0001	0.9998	0	0.0001	1	40	WILD_AII
G26701A-ELS	Wild	Colombia	Boyaca	WILD-AII	AII	0.0026	0.0002	0.0005	0.9455	0.0002	0.051	1	33	WILD_AII
G26618-COR	Wild	Colombia	Boyaca	WILD-AII	Admixed	0.3322	0	0.0002	0.6673	0	0.0003	1	58	WILD_AII
G26619-ELS	Wild	Colombia	Boyaca	WILD-AII	Admixed	0.3779	0.0002	0.0002	0.6214	0.0002	0.0002	1.0001	58	WILD_AII
G25819-COR	Wild	Colombia	Magdalena	WILD-CA	MII-S	0	0.0053	0.0112	0.0728	0.0009	0.9098	1	7	WILD_MII
G26309-ELS	Wild	Colombia	Magdalena	WILD-CA	MII-S	0	0	0.0002	0.0369	0	0.9628	0.9999	11	WILD_MII
G26527-COR	Wild	Colombia	Cordoba	WILD-CA	MII-S	0	0	0.0768	0.0187	0	0.9044	0.9999	0	WILD_NOT_ASSIGNED
G27298-COR	Wild	Colombia	Magdalena	WILD-CA	MII-S	0.0001	0.0013	0.0125	0.0988	0.0005	0.8868	1	7	WILD_MII
G27420-ELS	Wild	Colombia	Atlantico	WILD-CA	MII-S	0	0.2041	0.0002	0.0001	0.0001	0.7954	0.9999	30	WILD_MII
G27441-COR	Wild	Colombia	Atlantico	WILD-CA	MII-S	0	0.2091	0.0003	0.0006	0.0002	0.7897	0.9999	30	WILD_MII
G27442-COR	Wild	Colombia	Atlantico	WILD-CA	MII-S	0	0	0.0016	0.0089	0	0.9894	0.9999	35	WILD_MII
G25818-ELS	Wild	Panama	Colon	WILD-CA	MII-S	0.0001	0.0188	0.1801	0.0011	0.0005	0.7993	0.9999	0	WILD_NOT_ASSIGNED
G25227-COR	Wild	Costa Rica	Heredia	WILD-CA	MII-S	0	0	0.0318	0	0	0.9682	1	52	WILD_MII
G25586-COR	Wild	Costa Rica	Guanacaste	WILD-CA	MII-S	0	0	0.0885	0	0	0.9114	0.9999	0	WILD_NOT_ASSIGNED
G25963-ELS	Wild	Costa Rica	San Jose	WILD-CA	MII-S	0	0	0.0001	0	0	0.9999	1	0	WILD_NOT_ASSIGNED
G25964-COR	Wild	Costa Rica	San Jose	WILD-CA	MII-S	0	0	0.0004	0	0	0.9995	0.9999	29	WILD_MII
G25966-COR	Wild	Costa Rica	Cartago	WILD-CA	MII-S	0	0	0.0002	0	0	0.9997	0.9999	29	WILD_MII
G27292-COR	Wild	Costa Rica	Guanacaste	WILD-CA	MII-S	0	0	0.065	0	0	0.9349	0.9999	52	WILD_MII
G27387-COR	Wild	Costa Rica	Alajuela	WILD-CA	MII-S	0	0	0.0002	0	0	0.9998	1	29	WILD_MII
G27611-ELS	Wild	Costa Rica	Puntarenas	WILD-CA	MII-S	0	0	0.0588	0.0003	0	0.9408	0.9999	0	WILD_NOT_ASSIGNED
G27613-COR	Wild	Costa Rica	Heredia	WILD-CA	MII-S	0	0	0.0002	0	0	0.9997	0.9999	29	WILD_MII
G25273A-COR	Wild	El Salvador	Ahuachapan	WILD-CA	MII-N	0	0	0.9994	0	0	0.0005	0.9999	18	WILD_MII
G27608-COR	Wild	El Salvador	Santa Ana	WILD-CA	MII-N	0	0	0.9038	0.0021	0	0.0939	0.9998	0	WILD_NOT_ASSIGNED
G26628-COR	Wild	Honduras	El Paraiso	WILD-CA	MII-Admixed	0	0.0001	0.5557	0	0	0.4441	0.9999	20	WILD_MII
G26631-COR	Wild	Honduras	Yoro	WILD-CA	MII-Admixed	0	0.0001	0.3571	0.0001	0.0003	0.6424	1	0	WILD_NOT_ASSIGNED
G26633-COR	Wild	Honduras	Copan	WILD-CA	MII-N	0	0	0.8865	0.0001	0	0.1134	1	22	WILD_MII
G26634-COR	Wild	Honduras	Francisco Morazan	WILD-CA	MII-N	0	0	0.9614	0	0	0.0386	1	0	WILD_NOT_ASSIGNED
G26635-COR	Wild	Honduras	Francisco Morazan	WILD-CA	MII-Admixed	0	0	0.6906	0	0	0.3093	0.9999	20	WILD_MII
G26679-COR	Wild	Guatemala	Chimaltenango	WILD-CA	MII-N	0	0	0.973	0.0145	0	0.0124	0.9999	10	WILD_MII
G27578-COR	Wild	Guatemala	Chimaltenango	WILD-CA	MII-N	0	0	0.9428	0.0335	0	0.0236	0.9999	0	WILD_NOT_ASSIGNED
G26686-COR	Wild	Guatemala	El Progreso	WILD-CA	MII-N	0	0.0241	0.8597	0	0.0003	0.1158	0.9999	0	WILD_NOT_ASSIGNED
G26731-ELS	Wild	Guatemala	El Progreso	WILD-CA	MII-N	0	0	0.8944	0	0	0.1055	0.9999	49	WILD_MII
G25850-COR	Wild	Guatemala	Escuintla	WILD-CA	MII-Admixed	0	0	0.4152	0	0	0.5847	0.9999	53	WILD_MII
G25977-COR	Wild	Guatemala	Escuintla	WILD-CA	MII-N	0	0	0.9742	0	0	0.0257	0.9999	0	WILD_NOT_ASSIGNED
G26680-ELS	Wild	Guatemala	Escuintla	WILD-CA	Admixed	0	0.0004	0.5987	0	0.4002	0.0006	0.9999	0	WILD_NOT_ASSIGNED
G26734-COR	Wild	Guatemala	Escuintla	WILD-CA	MII-N	0	0	0.9789	0.0196	0	0.0015	1	56	WILD_MII
G26652-COR	Wild	Guatemala	Guatemala	WILD-CA	MII-N	0	0	0.9586	0.04	0	0.0013	0.9999	56	WILD_MII
G27579-ELS	Wild	Guatemala	Guatemala	WILD-CA	MII-N	0	0.0001	0.7761	0.0001	0.0001	0.2236	1	0	WILD_NOT_ASSIGNED
G25284-ELS	Wild	Guatemala	Jalapa	WILD-CA	MII-N	0	0	0.9997	0.0001	0	0.0001	0.9999	0	WILD_NOT_ASSIGNED
JMC_1089-COR	Wild	Guatemala	Petén	WILD-CA	MII-Admixed	0	0.0428	0.4425	0	0.0001	0.5146	1	1	WILD_MII
JMC_1097-COR	Wild	Guatemala	Petén	WILD-CA	MII-Admixed	0	0.1343	0.4518	0	0.0003	0.4135	0.9999	0	WILD_NOT_ASSIGNED
JMC_1099-COR	Wild	Guatemala	Petén	WILD-CA	MII-Admixed	0	0.0174	0.4521	0	0.0001	0.5303	0.9999	1	WILD_MII
JMC_1101-COR	Wild	Guatemala	Petén	WILD-CA	MII-Admixed	0	0.0001	0.4406	0.0001	0.0001	0.5591	1	53	WILD_MII
G26683-COR	Wild	Guatemala	Quezaltenango	WILD-CA	MII-N	0	0	0.952	0.0291	0	0.0188	0.9999	0	WILD_NOT_ASSIGNED
G27345-ELS	Wild	Guatemala	San Marcos	WILD-CA	MII-N	0	0	0.9694	0	0	0.0305	0.9999	96	WILD_MII
G25272D-COR	Wild	Guatemala	Santa Rosa	WILD-CA	MII-N	0	0	0.8996	0.0001	0	0.1003	1	22	WILD_MII
G26733-COR	Wild	Guatemala	Santa Rosa	WILD-CA	MII-N	0	0	0.9773	0.0198	0	0.0028	0.9999	17	WILD_MII
G26681-ELS	Wild	Guatemala	Suchitepequez	WILD-CA	MII-N	0	0	0.9936	0	0	0.0063	0.9999	27	WILD_MII
G25222-COR	Wild	Guatemala	Zacapa	WILD-CA	MII-N	0	0.0001	0.8069	0	0.0001	0.1928	0.9999	0	WILD_NOT_ASSIGNED
G25844-COR	Wild	Guatemala	Sacatepequez	WILD-GUA-AND	AI	1	0	0	0	0	0	1	65	WILD_AI
G26630-COR	Wild	Honduras	Olancho	WILD-GUA-AND	AI	1	0	0	0	0	0	1	98	WILD_AI
G26653-COR	Wild	Guatemala	Huehuetenango	WILD-GUA-AND	AI	0.9418	0.0001	0.0006	0.0286	0.0289	0.0001	1.0001	0	WILD_NOT_ASSIGNED
G26655-COR	Wild	Guatemala	Sacatepequez	WILD-GUA-AND	AI	0.9122	0.0001	0.0011	0.0337	0.0527	0.0002	1	46	WILD_AI
G26684-COR	Wild	Guatemala	Solola	WILD-GUA-AND	AI	1	0	0	0	0	0	1	67	WILD_AI
G26732-COR	Wild	Guatemala	Jalapa	WILD-GUA-AND	AI	0.9999	0	0	0	0	0	0.9999	28	WILD_AI
G26753-COR	Wild	Mexico	Chiapas	WILD-GUA-AND	AI	1	0	0	0	0	0	1	65	WILD_AI
JMC_1021-COR	Wild	Mexico	Quintana Roo	WILD-MEX-SOU	MII-Admixed	0	0	0.3024	0	0	0.6975	0.9999	0	WILD_NOT_ASSIGNED
JMC_1416	Wild	Mexico	Quintana Roo	WILD-MEX-SOU	Admixed	0	0.3061	0.2997	0	0.0004	0.3937	0.9999	41	WILD_MII
JMC_1417	Wild	Mexico	Quintana Roo	WILD-MEX-SOU	Admixed	0	0.2438	0.3701	0	0.0002	0.3858	0.9999	41	WILD_MII
JMC_1418	Wild	Mexico	Quintana Roo	WILD-MEX-SOU	Admixed	0	0.2766	0.35	0	0.0007	0.3726	0.9999	41	WILD_MII
G25234-COR	Wild	Mexico	Yucatan	WILD-MEX-SOU	MII-N	0	0	0.9957	0	0	0.0042	0.9999	0	WILD_NOT_ASSIGNED
G25816-ELS	Wild	Mexico	Yucatan	WILD-MEX-SOU	MII-Admixed	0	0.082	0.3119	0	0.0002	0.6058	0.9999	0	WILD_NOT_ASSIGNED
JMC_1010	Wild	Mexico	Yucatán	WILD-MEX-SOU	MII-Admixed	0	0.1299	0.2967	0	0.0003	0.573	0.9999	74	WILD_MII
JMC_1012-COR	Wild	Mexico	Yucatán	WILD-MEX-SOU	MII-Admixed	0	0.0511	0.3186	0	0.0002	0.6301	1	74	WILD_MII
JMC_1015	Wild	Mexico	Yucatán	WILD-MEX-SOU	MII-Admixed	0	0.1067	0.2789	0	0.0001	0.6141	0.9998	74	WILD_MII
JMC_221	Wild	Mexico	Yucatán	WILD-MEX-SOU	MII-Admixed	0	0.1879	0.3051	0	0.0004	0.5066	1	39	WILD_MII
JMC_549	Wild	Mexico	Yucatán	WILD-MEX-SOU	MII-Admixed	0	0.0271	0.281	0	0.0001	0.6918	1	74	WILD_MII
JMC_580-COR	Wild	Mexico	Yucatán	WILD-MEX-SOU	MII-Admixed	0	0.0482	0.3325	0	0.0001	0.6192	1	74	WILD_MII
JMC_609	Wild	Mexico	Yucatán	WILD-MEX-SOU	MII-Admixed	0	0.0781	0.3218	0	0.0001	0.6	1	74	WILD_MII
G25737-COR	Wild	Mexico	Campeche	WILD-MEX-SOU	MII-N	0	0.0001	0.7354	0.0001	0	0.2644	1	50	WILD_MII
G25762-COR	Wild	Mexico	Campeche	WILD-MEX-SOU	MII-N	0	0	0.9998	0	0	0.0002	1	27	WILD_MII
G25785-COR	Wild	Mexico	Campeche	WILD-MEX-SOU	MII-N	0	0	0.9642	0.0356	0	0.0001	0.9999	10	WILD_MII
JMC_1420	Wild	Mexico	Campeche	WILD-MEX-SOU	Admixed	0	0.3374	0.4716	0	0.0002	0.1908	1	0	WILD_NOT_ASSIGNED
JMC_715	Wild	Mexico	Campeche	WILD-MEX-SOU	Admixed	0	0.3312	0.2229	0	0.0003	0.4456	1	0	WILD_NOT_ASSIGNED
JMC_778	Wild	Mexico	Campeche	WILD-MEX-SOU	MII-Admixed	0	0.1829	0.364	0	0.0002	0.4529	1	39	WILD_MII
JMC_922-COR	Wild	Mexico	Campeche	WILD-MEX-SOU	MII-Admixed	0	0.0223	0.3164	0	0	0.6611	0.9998	74	WILD_MII
JMC_1398	Wild	Mexico	Tabasco	WILD-MEX-SOU	MII-N	0	0.0168	0.9184	0	0.0005	0.0642	0.9999	24	WILD_MII
JMC_1063-COR	Wild	Mexico	Veracruz	WILD-MEX-SOU	MII-N	0	0	0.9961	0	0	0.0038	0.9999	0	WILD_NOT_ASSIGNED
JMC_1162-COR	Wild	Mexico	Veracruz	WILD-MEX-SOU	MII-N	0	0	0.9326	0.0001	0.0001	0.0672	1	13	WILD_MII
JMC_1168	Wild	Mexico	Veracruz	WILD-MEX-SOU	MII-N	0	0.0001	0.935	0.0001	0.0143	0.0504	0.9999	13	WILD_MII
JMC_1175-COR	Wild	Mexico	Veracruz	WILD-MEX-SOU	MII-N	0	0.0009	0.9256	0.0001	0.0214	0.0521	1.0001	13	WILD_MII
JMC_1421	Wild	Mexico	Veracruz	WILD-MEX-SOU	MII-Admixed	0	0.0001	0.326	0.0001	0.0002	0.6735	0.9999	0	WILD_NOT_ASSIGNED
JMC_1422	Wild	Mexico	Veracruz	WILD-MEX-SOU	MII-N	0	0.0226	0.975	0	0.0013	0.001	0.9999	55	WILD_MII
G26531-COR	Wild	Mexico	Chiapas	WILD-MEX-SOU	MII-N	0	0	0.9474	0.0358	0	0.0167	0.9999	10	WILD_MII
G26533-ELS	Wild	Mexico	Chiapas	WILD-MEX-SOU	MII-N	0	0.0148	0.9849	0	0.0001	0.0002	1	0	WILD_NOT_ASSIGNED
G26754-ELS	Wild	Mexico	Chiapas	WILD-MEX-SOU	MII-N	0	0	0.9997	0	0	0.0002	0.9999	18	WILD_MII
JMC_1388	Wild	Mexico	Chiapas	WILD-MEX-SOU	MII-N	0	0.1149	0.8243	0	0.0164	0.0444	1	24	WILD_MII
JMC_1389	Wild	Mexico	Chiapas	WILD-MEX-SOU	MII-N	0	0.0187	0.9755	0.0002	0.0006	0.0049	0.9999	0	WILD_NOT_ASSIGNED
JMC_1390	Wild	Mexico	Chiapas	WILD-MEX-SOU	MII-N	0	0.0005	0.9818	0.0001	0.0173	0.0003	1	0	WILD_NOT_ASSIGNED
JMC_1391-COR	Wild	Mexico	Chiapas	WILD-MEX-SOU	MII-N	0	0	0.989	0	0.0003	0.0106	0.9999	61	WILD_MII
JMC_1392	Wild	Mexico	Chiapas	WILD-MEX-SOU	MII-N	0	0.0001	0.9926	0	0.0001	0.0072	1	61	WILD_MII
JMC_1393-COR	Wild	Mexico	Chiapas	WILD-MEX-SOU	Admixed	0	0.2844	0.6236	0	0.0738	0.0181	0.9999	0	WILD_NOT_ASSIGNED
JMC_1394-COR	Wild	Mexico	Chiapas	WILD-MEX-SOU	MII-N	0	0.0001	0.9965	0	0.0001	0.0034	1.0001	12	WILD_MII
JMC_1400	Wild	Mexico	Chiapas	WILD-MEX-SOU	MII-Admixed	0	0.0031	0.6988	0	0.0001	0.2979	0.9999	50	WILD_MII
JMC_1401	Wild	Mexico	Chiapas	WILD-MEX-SOU	MII-N	0	0	0.9819	0	0	0.018	0.9999	86	WILD_MII
JMC_1402	Wild	Mexico	Chiapas	WILD-MEX-SOU	MII-N	0	0.0012	0.972	0.0001	0.0001	0.0266	1	86	WILD_MII
JMC_1404	Wild	Mexico	Chiapas	WILD-MEX-SOU	MII-N	0	0.0158	0.9839	0	0.0002	0.0001	1	96	WILD_MII
JMC_1405	Wild	Mexico	Chiapas	WILD-MEX-SOU	MII-N	0	0	0.9997	0	0	0.0002	0.9999	96	WILD_MII
JMC_1406	Wild	Mexico	Chiapas	WILD-MEX-SOU	MII-N	0	0.0003	0.9889	0	0.0009	0.0098	0.9999	96	WILD_MII
JMC_1407	Wild	Mexico	Chiapas	WILD-MEX-SOU	MII-N	0	0.0001	0.9827	0	0	0.0171	0.9999	96	WILD_MII
JMC_1408	Wild	Mexico	Chiapas	WILD-MEX-SOU	MII-N	0	0.015	0.9846	0	0.0002	0.0001	0.9999	96	WILD_MII
JMC_1409	Wild	Mexico	Chiapas	WILD-MEX-SOU	MII-N	0	0.0042	0.9953	0	0.0004	0.0001	1	96	WILD_MII
JMC_1410	Wild	Mexico	Chiapas	WILD-MEX-SOU	MII-N	0	0	0.9884	0	0	0.0115	0.9999	96	WILD_MII
JMC_1411	Wild	Mexico	Chiapas	WILD-MEX-SOU	MII-N	0	0	0.9997	0	0	0.0003	1	0	WILD_NOT_ASSIGNED
JMC_1412	Wild	Mexico	Chiapas	WILD-MEX-SOU	MII-N	0	0.0031	0.9944	0	0.0024	0.0001	1	12	WILD_MII
JMC_1413	Wild	Mexico	Chiapas	WILD-MEX-SOU	Admixed	0	0.0097	0.6056	0	0.3845	0.0002	1	0	WILD_NOT_ASSIGNED
G26740-COR	Wild	Mexico	Oaxaca	WILD-MEX-SOU	MII-N	0	0	0.8897	0	0	0.1103	1	49	WILD_MII
JMC_1065	Wild	Mexico	Oaxaca	WILD-MEX-SOU	MII-N	0	0.0273	0.9694	0	0.0026	0.0007	1	79	WILD_MII
JMC_1077	Wild	Mexico	Oaxaca	WILD-MEX-SOU	MII-N	0	0.0001	0.9392	0	0.0507	0.0099	0.9999	79	WILD_MII
JMC_1078	Wild	Mexico	Oaxaca	WILD-MEX-SOU	MII-N	0	0.0005	0.9974	0	0.0021	0.0001	1.0001	77	WILD_MII
JMC_1079	Wild	Mexico	Oaxaca	WILD-MEX-SOU	MII-N	0	0.0002	0.9995	0	0.0001	0.0001	0.9999	77	WILD_MII
JMC_1080	Wild	Mexico	Oaxaca	WILD-MEX-SOU	MII-N	0	0.0039	0.9854	0	0.0106	0.0001	1	77	WILD_MII
JMC_1081	Wild	Mexico	Oaxaca	WILD-MEX-SOU	MII-N	0	0.0048	0.9829	0	0.0121	0.0001	0.9999	38	WILD_MII
JMC_1082	Wild	Mexico	Oaxaca	WILD-MEX-SOU	MII-N	0	0.0016	0.9784	0	0.0199	0.0001	1	38	WILD_MII
G25233-COR	Wild	Belize	Cayo District	WILD-MEX-CEN	WILD-MI	0	0.0496	0.0032	0.0001	0.9465	0.0005	0.9999	0	WILD_NOT_ASSIGNED
JMC_1157	Wild	Mexico	Veracruz	WILD-MEX-CEN	WILD-MI	0.0021	0.222	0.0001	0	0.7756	0.0001	0.9999	0	WILD_NOT_ASSIGNED
G26741-ELS	Wild	Mexico	Oaxaca	WILD-MEX-CEN	WILD-MI	0	0.1527	0.0014	0.0001	0.8452	0.0006	1	0	WILD_NOT_ASSIGNED
G26742-ELS	Wild	Mexico	Oaxaca	WILD-MEX-CEN	WILD-MI	0	0.0602	0.0001	0	0.9395	0.0001	0.9999	26	WILD_MI_SOUTHERN_WESTERN_MEXICO
JMC_1068	Wild	Mexico	Oaxaca	WILD-MEX-CEN	WILD-MI	0	0.0971	0.0329	0.0001	0.8684	0.0015	1	0	WILD_NOT_ASSIGNED
JMC_1069	Wild	Mexico	Oaxaca	WILD-MEX-CEN	WILD-MI	0	0.0432	0.022	0.0001	0.9344	0.0003	1	66	WILD_MI_SOUTHERN_WESTERN_MEXICO
JMC_1070	Wild	Mexico	Oaxaca	WILD-MEX-CEN	WILD-MI	0	0.0933	0.0004	0.0002	0.9044	0.0018	1.0001	66	WILD_MI_SOUTHERN_WESTERN_MEXICO
JMC_1072	Wild	Mexico	Oaxaca	WILD-MEX-CEN	WILD-MI	0	0.2259	0	0	0.7741	0	1	26	WILD_MI_SOUTHERN_WESTERN_MEXICO
JMC_1073	Wild	Mexico	Oaxaca	WILD-MEX-CEN	WILD-MI	0	0.0989	0.0013	0.0001	0.8995	0.0002	1	26	WILD_MI_SOUTHERN_WESTERN_MEXICO
JMC_1074	Wild	Mexico	Oaxaca	WILD-MEX-CEN	WILD-MI	0.0002	0.0763	0.0001	0.0001	0.9232	0.0001	1	26	WILD_MI_SOUTHERN_WESTERN_MEXICO
JMC_1075	Wild	Mexico	Oaxaca	WILD-MEX-CEN	WILD-MI	0	0.1801	0	0	0.8198	0	0.9999	26	WILD_MI_SOUTHERN_WESTERN_MEXICO
JMC_1076	Wild	Mexico	Oaxaca	WILD-MEX-CEN	WILD-MI	0	0.0623	0.0006	0.0001	0.9367	0.0003	1	26	WILD_MI_SOUTHERN_WESTERN_MEXICO
G26517-ELS	Wild	Mexico	Guerrero	WILD-MEX-CEN	WILD-MI	0	0.2379	0.0001	0	0.7619	0	0.9999	0	WILD_NOT_ASSIGNED
G26518-ELS	Wild	Mexico	Guerrero	WILD-MEX-CEN	WILD-MI	0	0.0724	0	0	0.9275	0	0.9999	0	WILD_NOT_ASSIGNED
G26519-COR	Wild	Mexico	Guerrero	WILD-MEX-CEN	MII-Admixed	0	0.0329	0.3042	0	0.0001	0.6628	1	74	WILD_MII
JMC_1150	Wild	Mexico	Guerrero	WILD-MEX-CEN	WILD-MI	0	0.2775	0.0144	0	0.7081	0.0001	1.0001	0	WILD_NOT_ASSIGNED
JMC_1151	Wild	Mexico	Guerrero	WILD-MEX-CEN	WILD-MI	0	0.2119	0	0	0.7881	0	1	0	WILD_NOT_ASSIGNED
JMC_1152	Wild	Mexico	Guerrero	WILD-MEX-CEN	WILD-MI	0	0.2774	0	0	0.7225	0	0.9999	83	WILD_MI_SOUTHERN_WESTERN_MEXICO
JMC_1153	Wild	Mexico	Guerrero	WILD-MEX-CEN	WILD-MI	0	0.2111	0	0	0.7888	0	0.9999	83	WILD_MI_SOUTHERN_WESTERN_MEXICO
JMC_1154	Wild	Mexico	Guerrero	WILD-MEX-CEN	WILD-MI	0	0.1885	0	0	0.8114	0	0.9999	99	WILD_MI_SOUTHERN_WESTERN_MEXICO
UDG-CICY_1	Wild	Mexico	Guerrero	WILD-MEX-CEN	WILD-MI	0	0.2632	0	0	0.7367	0	0.9999	99	WILD_MI_SOUTHERN_WESTERN_MEXICO
UDG-CICY_9	Wild	Mexico	Guerrero	WILD-MEX-CEN	WILD-MI	0.0044	0.1538	0.0001	0.0001	0.8416	0.0001	1.0001	2	WILD_MI_SOUTHERN_WESTERN_MEXICO
JMC_1146	Wild	Mexico	Michoacán	WILD-MEX-CEN	WILD-MI	0.0038	0.2443	0.0001	0	0.7517	0.0001	1	3	WILD_MI_SOUTHERN_WESTERN_MEXICO
JMC_1149	Wild	Mexico	Michoacán	WILD-MEX-CEN	WILD-MI	0	0.2714	0	0	0.7285	0	0.9999	2	WILD_MI_SOUTHERN_WESTERN_MEXICO
ROL_503	Wild	Mexico	Michoacán	WILD-MEX-CEN	WILD-MI	0	0.2454	0	0	0.7546	0	1	69	WILD_MI_NORTHERN_WESTERN_MEXICO
ROL_506	Wild	Mexico	Michoacán	WILD-MEX-CEN	WILD-MI	0.0016	0.1722	0.001	0.0002	0.8248	0.0003	1.0001	0	WILD_NOT_ASSIGNED
ROL_560	Wild	Mexico	Michoacán	WILD-MEX-CEN	WILD-MI	0	0.2607	0	0	0.7392	0	0.9999	31	WILD_MI_SOUTHERN_WESTERN_MEXICO
UDG-CICY_2	Wild	Mexico	Michoacán	WILD-MEX-CEN	WILD-MI	0.0212	0.1322	0.0002	0.0002	0.846	0.0002	1	34	WILD_MI_SOUTHERN_WESTERN_MEXICO
UDG-CICY_3	Wild	Mexico	Michoacán	WILD-MEX-CEN	WILD-MI	0.0061	0.2267	0.0001	0.0001	0.767	0	1	34	WILD_MI_SOUTHERN_WESTERN_MEXICO
UDG-CICY_4	Wild	Mexico	Michoacán	WILD-MEX-CEN	WILD-MI	0.0133	0.1981	0.0001	0.0009	0.7874	0.0002	1	34	WILD_MI_SOUTHERN_WESTERN_MEXICO
UDG-CICY_5	Wild	Mexico	Michoacán	WILD-MEX-CEN	WILD-MI	0.052	0.1291	0.0021	0.0013	0.8099	0.0057	1.0001	0	WILD_NOT_ASSIGNED
UDG-CICY_6	Wild	Mexico	Michoacán	WILD-MEX-CEN	WILD-MI	0.0057	0.1276	0.0001	0	0.8665	0.0001	1	3	WILD_MI_SOUTHERN_WESTERN_MEXICO
UDG-CICY_7	Wild	Mexico	Michoacán	WILD-MEX-CEN	WILD-MI	0.0081	0.1053	0.0001	0.0001	0.8863	0	0.9999	3	WILD_MI_SOUTHERN_WESTERN_MEXICO
UDG-CICY_8	Wild	Mexico	Michoacán	WILD-MEX-CEN	WILD-MI	0.0059	0.243	0	0	0.751	0	0.9999	34	WILD_MI_SOUTHERN_WESTERN_MEXICO
G25843-ELS	Wild	Mexico	Morelos	WILD-MEX-CEN	MI-Admixed	0	0.3584	0	0	0.6415	0	0.9999	92	WILD_MI_SOUTHERN_WESTERN_MEXICO
G25970-COR	Wild	Mexico	Morelos	WILD-MEX-CEN	MII-S	0	0	0.0001	0	0	0.9999	1	0	WILD_NOT_ASSIGNED
G26358-COR	Wild	Mexico	Morelos	WILD-MEX-CEN	WILD-MI	0	0.1428	0.0001	0.0001	0.857	0	1	92	WILD_MI_SOUTHERN_WESTERN_MEXICO
G26359-COR	Wild	Mexico	Puebla	WILD-MEX-CEN	WILD-MI	0	0.1261	0.0002	0	0.8735	0.0001	0.9999	0	WILD_NOT_ASSIGNED
G26360-ELS	Wild	Mexico	Puebla	WILD-MEX-CEN	WILD-MI	0.0001	0.1321	0	0	0.8677	0	0.9999	0	WILD_NOT_ASSIGNED
G26541-COR	Wild	Mexico	Puebla	WILD-MEX-CEN	MII-S	0	0.0281	0.0008	0.2575	0.0001	0.7135	1	4	WILD_MII
JMC_1173-COR	Wild	Mexico	Tamaulipas	WILD-MEX-CEN	WILD-MI	0	0.1517	0.0404	0.0003	0.801	0.0066	1	0	WILD_NOT_ASSIGNED
JMC_1174	Wild	Mexico	Tamaulipas	WILD-MEX-CEN	WILD-MI	0	0.2448	0.0097	0.0001	0.7439	0.0015	1	0	WILD_NOT_ASSIGNED
JMC_1395	Wild	Mexico	Tamaulipas	WILD-MEX-CEN	MII-N	0	0.013	0.9679	0	0.0012	0.0179	1	55	WILD_MII
G25230-ELS	Wild	Mexico	Colima	WILD-MEX-PACN	WILD-MI	0.0005	0.0046	0	0	0.9948	0	0.9999	91	WILD_MI_NORTHERN_WESTERN_MEXICO
G25231-COR	Wild	Mexico	Colima	WILD-MEX-PACN	WILD-MI	0.0007	0.0028	0	0	0.9964	0	0.9999	91	WILD_MI_NORTHERN_WESTERN_MEXICO
JMC_1142	Wild	Mexico	Colima	WILD-MEX-PACN	WILD-MI	0.0002	0.0208	0	0	0.9789	0	0.9999	91	WILD_MI_NORTHERN_WESTERN_MEXICO
JMC_1143	Wild	Mexico	Colima	WILD-MEX-PACN	WILD-MI	0	0.0865	0	0	0.9135	0	1	91	WILD_MI_NORTHERN_WESTERN_MEXICO
JMC_1144	Wild	Mexico	Colima	WILD-MEX-PACN	WILD-MI	0.0046	0.1143	0	0	0.8811	0	1	31	WILD_MI_SOUTHERN_WESTERN_MEXICO
ROL_341	Wild	Mexico	Colima	WILD-MEX-PACN	WILD-MI	0	0.1383	0	0	0.8617	0	1	91	WILD_MI_NORTHERN_WESTERN_MEXICO
ROL_407	Wild	Mexico	Colima	WILD-MEX-PACN	Admixed	0.3203	0.0215	0.0751	0.0597	0.5216	0.0016	0.9998	0	WILD_NOT_ASSIGNED
JMC_1127	Wild	Mexico	Jalisco	WILD-MEX-PACN	WILD-MI	0.0036	0.0072	0.0103	0.0001	0.9787	0.0001	1	89	WILD_MI_NORTHERN_WESTERN_MEXICO
JMC_1128	Wild	Mexico	Jalisco	WILD-MEX-PACN	WILD-MI	0	0.0073	0.0034	0	0.9883	0.001	1	89	WILD_MI_NORTHERN_WESTERN_MEXICO
JMC_1129	Wild	Mexico	Jalisco	WILD-MEX-PACN	WILD-MI	0	0.0774	0.0095	0	0.913	0.0001	1	89	WILD_MI_NORTHERN_WESTERN_MEXICO
JMC_1130	Wild	Mexico	Jalisco	WILD-MEX-PACN	WILD-MI	0	0.1129	0	0	0.887	0	0.9999	76	WILD_MI_NORTHERN_WESTERN_MEXICO
JMC_1131	Wild	Mexico	Jalisco	WILD-MEX-PACN	WILD-MI	0	0.1051	0	0	0.8949	0	1	76	WILD_MI_NORTHERN_WESTERN_MEXICO
JMC_1133	Wild	Mexico	Jalisco	WILD-MEX-PACN	WILD-MI	0	0.0022	0.0001	0.0001	0.9976	0	1	90	WILD_MI_NORTHERN_WESTERN_MEXICO
JMC_1134	Wild	Mexico	Jalisco	WILD-MEX-PACN	WILD-MI	0	0.0931	0	0	0.9068	0	0.9999	90	WILD_MI_NORTHERN_WESTERN_MEXICO
JMC_1135	Wild	Mexico	Jalisco	WILD-MEX-PACN	WILD-MI	0	0.0612	0	0	0.9387	0	0.9999	90	WILD_MI_NORTHERN_WESTERN_MEXICO
JMC_1136	Wild	Mexico	Jalisco	WILD-MEX-PACN	WILD-MI	0	0.0285	0	0	0.9714	0	0.9999	90	WILD_MI_NORTHERN_WESTERN_MEXICO
JMC_1137	Wild	Mexico	Jalisco	WILD-MEX-PACN	WILD-MI	0.0047	0.0001	0.0002	0.0001	0.9948	0.0001	1	90	WILD_MI_NORTHERN_WESTERN_MEXICO
JMC_1138	Wild	Mexico	Jalisco	WILD-MEX-PACN	WILD-MI	0	0.0025	0	0	0.9975	0	1	90	WILD_MI_NORTHERN_WESTERN_MEXICO
JMC_1141	Wild	Mexico	Jalisco	WILD-MEX-PACN	MII-N	0	0	0.9998	0	0	0.0002	1	0	WILD_NOT_ASSIGNED
G25704-COR	Wild	Mexico	Jalisco	WILD-MEX-PACN	MII-Admixed	0	0.0545	0.303	0	0.0002	0.6423	1	0	WILD_NOT_ASSIGNED
G26355-COR	Wild	Mexico	Jalisco	WILD-MEX-PACN	MII-S	0	0	0.0883	0.1308	0	0.7808	0.9999	16	WILD_MII
JMC_1108-COR	Wild	Mexico	Jalisco	WILD-MEX-PACN	Admixed	0.2452	0.0137	0.2038	0.1645	0.326	0.0468	1	0	WILD_NOT_ASSIGNED
ROL_167	Wild	Mexico	Jalisco	WILD-MEX-PACN	WILD-MI	0	0.2997	0	0	0.7002	0	0.9999	0	WILD_NOT_ASSIGNED
ROL_224-COR	Wild	Mexico	Jalisco	WILD-MEX-PACN	WILD-MI	0	0.1841	0.0044	0.0002	0.8111	0.0002	1	82	WILD_MI_SOUTHERN_WESTERN_MEXICO
ROL_348	Wild	Mexico	Jalisco	WILD-MEX-PACN	WILD-MI	0.0001	0.1827	0.0001	0	0.8169	0.0001	0.9999	45	WILD_MI_SOUTHERN_WESTERN_MEXICO
ROL_428	Wild	Mexico	Jalisco	WILD-MEX-PACN	WILD-MI	0	0.0064	0	0	0.9935	0	0.9999	90	WILD_MI_NORTHERN_WESTERN_MEXICO
ROL_464	Wild	Mexico	Jalisco	WILD-MEX-PACN	MI-Admixed	0	0.3418	0	0	0.6581	0	0.9999	0	WILD_NOT_ASSIGNED
ROL_511	Wild	Mexico	Jalisco	WILD-MEX-PACN	WILD-MI	0	0.0917	0	0	0.9082	0	0.9999	32	WILD_MI_NORTHERN_WESTERN_MEXICO
ROL_513	Wild	Mexico	Jalisco	WILD-MEX-PACN	WILD-MI	0	0.0639	0	0	0.9361	0	1	32	WILD_MI_NORTHERN_WESTERN_MEXICO
ROL_535	Wild	Mexico	Jalisco	WILD-MEX-PACN	WILD-MI	0.1726	0.0079	0.0256	0.0271	0.7667	0.0001	1	0	WILD_NOT_ASSIGNED
ROL_542	Wild	Mexico	Jalisco	WILD-MEX-PACN	WILD-MI	0	0.1408	0	0	0.8592	0	1	0	WILD_NOT_ASSIGNED
ROL_543	Wild	Mexico	Jalisco	WILD-MEX-PACN	WILD-MI	0	0.0516	0	0	0.9483	0	0.9999	90	WILD_MI_NORTHERN_WESTERN_MEXICO
ROL_544	Wild	Mexico	Jalisco	WILD-MEX-PACN	WILD-MI	0	0.1117	0	0	0.8883	0	1	32	WILD_MI_NORTHERN_WESTERN_MEXICO
ROL_546	Wild	Mexico	Jalisco	WILD-MEX-PACN	WILD-MI	0	0.0041	0	0	0.9959	0	1	90	WILD_MI_NORTHERN_WESTERN_MEXICO
ROL_547	Wild	Mexico	Jalisco	WILD-MEX-PACN	WILD-MI	0	0.2296	0	0	0.7703	0	0.9999	0	WILD_NOT_ASSIGNED
ROL_549	Wild	Mexico	Jalisco	WILD-MEX-PACN	WILD-MI	0	0.0879	0	0	0.9121	0	1	90	WILD_MI_NORTHERN_WESTERN_MEXICO
ROL_551	Wild	Mexico	Jalisco	WILD-MEX-PACN	WILD-MI	0	0.074	0	0	0.9259	0	0.9999	0	WILD_NOT_ASSIGNED
ROL_552	Wild	Mexico	Jalisco	WILD-MEX-PACN	WILD-MI	0.0026	0.0094	0.0631	0.0001	0.9246	0.0002	1	89	WILD_MI_NORTHERN_WESTERN_MEXICO
ROL_553	Wild	Mexico	Jalisco	WILD-MEX-PACN	WILD-MI	0	0.0581	0.0019	0	0.9391	0.001	1.0001	89	WILD_MI_NORTHERN_WESTERN_MEXICO
ROL_554	Wild	Mexico	Jalisco	WILD-MEX-PACN	Admixed	0.3485	0.0114	0.0961	0.0625	0.481	0.0005	1	0	WILD_NOT_ASSIGNED
JMC_1109-COR	Wild	Mexico	Guanajuato	WILD-MEX-PACN	WILD-MI	0	0.2171	0	0	0.7828	0	0.9999	82	WILD_MI_SOUTHERN_WESTERN_MEXICO
G25228-ELS-2	Wild	Mexico	Nayarit	WILD-MEX-PACN	WILD-MI	0.0059	0.0062	0.0548	0.0001	0.9329	0.0002	1.0001	89	WILD_MI_NORTHERN_WESTERN_MEXICO
G25229-ELS	Wild	Mexico	Nayarit	WILD-MEX-PACN	WILD-MI	0.0049	0.0058	0.0195	0	0.9692	0.0006	1	89	WILD_MI_NORTHERN_WESTERN_MEXICO
JMC_1111	Wild	Mexico	Nayarit	WILD-MEX-PACN	WILD-MI	0	0.0972	0	0	0.9028	0	1	100	WILD_MI_NORTHERN_WESTERN_MEXICO
JMC_1112	Wild	Mexico	Nayarit	WILD-MEX-PACN	WILD-MI	0	0.0824	0	0	0.9176	0	1	100	WILD_MI_NORTHERN_WESTERN_MEXICO
JMC_1113	Wild	Mexico	Nayarit	WILD-MEX-PACN	WILD-MI	0	0.1212	0	0	0.8787	0	0.9999	68	WILD_MI_NORTHERN_WESTERN_MEXICO
ROL_178	Wild	Mexico	Nayarit	WILD-MEX-PACN	WILD-MI	0	0.1398	0	0	0.8601	0	0.9999	100	WILD_MI_NORTHERN_WESTERN_MEXICO
ROL_359	Wild	Mexico	Nayarit	WILD-MEX-PACN	WILD-MI	0	0.159	0	0	0.841	0	1	0	WILD_NOT_ASSIGNED
ROL_448	Wild	Mexico	Nayarit	WILD-MEX-PACN	MI-Admixed	0	0.4098	0	0	0.5902	0	1	45	WILD_MI_SOUTHERN_WESTERN_MEXICO
ROL_460	Wild	Mexico	Nayarit	WILD-MEX-PACN	WILD-MI	0	0.2119	0	0	0.7881	0	1	82	WILD_MI_SOUTHERN_WESTERN_MEXICO
ROL_528	Wild	Mexico	Nayarit	WILD-MEX-PACN	MI-Admixed	0	0.3506	0	0	0.6493	0	0.9999	0	WILD_NOT_ASSIGNED
ROL_555	Wild	Mexico	Nayarit	WILD-MEX-PACN	WILD-MI	0	0.09	0	0	0.91	0	1	0	WILD_NOT_ASSIGNED
ROL_557	Wild	Mexico	Nayarit	WILD-MEX-PACN	WILD-MI	0	0.2227	0	0	0.7773	0	1	69	WILD_MI_NORTHERN_WESTERN_MEXICO
ROL_559	Wild	Mexico	Nayarit	WILD-MEX-PACN	WILD-MI	0	0.0024	0.013	0	0.9844	0.0001	0.9999	48	WILD_MI_NORTHERN_WESTERN_MEXICO
UDG-CICY_10	Wild	Mexico	Nayarit	WILD-MEX-PACN	WILD-MI	0	0.0101	0.0089	0	0.9808	0.0001	0.9999	100	WILD_MI_NORTHERN_WESTERN_MEXICO
UDG-CICY_11	Wild	Mexico	Nayarit	WILD-MEX-PACN	WILD-MI	0	0.0064	0.0024	0	0.991	0.0001	0.9999	48	WILD_MI_NORTHERN_WESTERN_MEXICO
UDG-CICY_12	Wild	Mexico	Nayarit	WILD-MEX-PACN	WILD-MI	0	0.0007	0.0001	0	0.9991	0	0.9999	48	WILD_MI_NORTHERN_WESTERN_MEXICO
UDG-CICY_13	Wild	Mexico	Nayarit	WILD-MEX-PACN	WILD-MI	0	0.0021	0	0	0.9978	0	0.9999	100	WILD_MI_NORTHERN_WESTERN_MEXICO
UDG-CICY_14	Wild	Mexico	Nayarit	WILD-MEX-PACN	WILD-MI	0	0.0702	0	0	0.9297	0	0.9999	100	WILD_MI_NORTHERN_WESTERN_MEXICO
UDG-CICY_15	Wild	Mexico	Nayarit	WILD-MEX-PACN	MI-Admixed	0	0.3373	0	0	0.6626	0	0.9999	0	WILD_NOT_ASSIGNED
UDG-CICY_16	Wild	Mexico	Nayarit	WILD-MEX-PACN	WILD-MI	0	0.0124	0	0	0.9876	0	1	68	WILD_MI_NORTHERN_WESTERN_MEXICO
UDG-CICY_17	Wild	Mexico	Nayarit	WILD-MEX-PACN	WILD-MI	0	0.0009	0.0001	0	0.999	0	1	68	WILD_MI_NORTHERN_WESTERN_MEXICO
UDG-CICY_18	Wild	Mexico	Nayarit	WILD-MEX-PACN	WILD-MI	0	0.0561	0	0	0.9439	0	1	68	WILD_MI_NORTHERN_WESTERN_MEXICO
JMC_1114	Wild	Mexico	Sinaloa	WILD-MEX-PACN	WILD-MI	0.0009	0.0002	0.0001	0	0.9987	0.0001	1	94	WILD_MI_NORTHERN_WESTERN_MEXICO
JMC_1116	Wild	Mexico	Sinaloa	WILD-MEX-PACN	WILD-MI	0	0.0004	0.0034	0	0.9935	0.0027	1	48	WILD_MI_NORTHERN_WESTERN_MEXICO
JMC_1118	Wild	Mexico	Sinaloa	WILD-MEX-PACN	WILD-MI	0	0.0007	0	0	0.9993	0	1	94	WILD_MI_NORTHERN_WESTERN_MEXICO
JMC_1119	Wild	Mexico	Sinaloa	WILD-MEX-PACN	WILD-MI	0	0.023	0	0	0.977	0	1	94	WILD_MI_NORTHERN_WESTERN_MEXICO
JMC_1120	Wild	Mexico	Sinaloa	WILD-MEX-PACN	WILD-MI	0	0.0588	0	0	0.9412	0	1	94	WILD_MI_NORTHERN_WESTERN_MEXICO
JMC_1121	Wild	Mexico	Sinaloa	WILD-MEX-PACN	WILD-MI	0	0.0563	0	0	0.9436	0	0.9999	0	WILD_NOT_ASSIGNED
JMC_1122	Wild	Mexico	Sinaloa	WILD-MEX-PACN	WILD-MI	0	0.0113	0.0001	0.0001	0.9884	0.0001	1	0	WILD_NOT_ASSIGNED
JMC_1123	Wild	Mexico	Sinaloa	WILD-MEX-PACN	WILD-MI	0	0.0084	0.0194	0	0.9721	0.0001	1	0	WILD_NOT_ASSIGNED
JMC_1124	Wild	Mexico	Sinaloa	WILD-MEX-PACN	WILD-MI	0	0.0523	0	0	0.9476	0	0.9999	94	WILD_MI_NORTHERN_WESTERN_MEXICO
JMC_1125-COR	Wild	Mexico	Sinaloa	WILD-MEX-PACN	WILD-MI	0	0.0001	0.0001	0	0.9997	0.0001	1	94	WILD_MI_NORTHERN_WESTERN_MEXICO
UDG-CICY_19	Wild	Mexico	Sinaloa	WILD-MEX-PACN	WILD-MI	0	0.0047	0	0	0.9953	0	1	94	WILD_MI_NORTHERN_WESTERN_MEXICO
UDG-CICY_20	Wild	Mexico	Sinaloa	WILD-MEX-PACN	WILD-MI	0	0.0347	0	0	0.9653	0	1	94	WILD_MI_NORTHERN_WESTERN_MEXICO
UDG-CICY_21	Wild	Mexico	Sinaloa	WILD-MEX-PACN	WILD-MI	0	0.0847	0	0	0.9152	0	0.9999	94	WILD_MI_NORTHERN_WESTERN_MEXICO
UDG-CICY_22	Wild	Mexico	Sinaloa	WILD-MEX-PACN	WILD-MI	0	0.0348	0	0	0.9651	0	0.9999	94	WILD_MI_NORTHERN_WESTERN_MEXICO
UDG-CICY_23	Wild	Mexico	Sinaloa	WILD-MEX-PACN	WILD-MI	0	0.0013	0	0	0.9986	0	0.9999	94	WILD_MI_NORTHERN_WESTERN_MEXICO
UDG-CICY_24	Wild	Mexico	Sinaloa	WILD-MEX-PACN	WILD-MI	0	0.0093	0	0	0.9906	0	0.9999	94	WILD_MI_NORTHERN_WESTERN_MEXICO
G25236-ELS	Domesticated	Argentina	Buenos Aires	DOM-SAM	DOM-MI	0	0.9998	0	0	0.0001	0	0.9999	93	DOM_MI_SOUTH_AMERICA
G25541-ELS	Domesticated	Argentina	Tucuman	DOM-SAM	DOM-MI	0	0.9998	0	0	0.0001	0	0.9999	71	DOM_MI_SOUTH_AMERICA
G25542-COR	Domesticated	Argentina	Corrientes	DOM-SAM	DOM-MI	0	0.9999	0	0	0.0001	0	1	71	DOM_MI_SOUTH_AMERICA
G25543-COR	Domesticated	Argentina	Santiago Del Estero	DOM-SAM	DOM-MI	0	0.9999	0	0	0.0001	0	1	71	DOM_MI_SOUTH_AMERICA
G26290-ELS	Domesticated	Argentina	Formosa	DOM-SAM	DOM-MI	0.0018	0.9825	0.0001	0.0001	0.0029	0.0125	0.9999	71	DOM_MI_SOUTH_AMERICA
G25148-ELS	Domesticated	Brazil	Pernambuco	DOM-SAM	DOM-MI	0	0.9998	0	0	0.0001	0	0.9999	57	DOM_MI_SOUTH_AMERICA
G26141A-ELS	Domesticated	Brazil	Rio Grande Do Sul	DOM-SAM	DOM-MI	0	0.9932	0.0001	0	0.0001	0.0066	1	57	DOM_MI_SOUTH_AMERICA
G27622-ELS	Domesticated	Chile	Region Ix Malleco (Region De La Araucania)	DOM-SAM	DOM-MI	0	0.9998	0	0	0.0001	0	0.9999	93	DOM_MI_SOUTH_AMERICA
G27358-ELS	Domesticated	Peru	San Martin	DOM-SAM	DOM-MI	0	0.9999	0	0	0.0001	0	1	57	DOM_MI_SOUTH_AMERICA
G25410-ELS	Domesticated	Ecuador	Los Rios	DOM-SAM	DOM-MI	0.0121	0.9813	0.0007	0	0.0026	0.0032	0.9999	54	DOM_MI_MEX_CNA
G26714-COR	Domesticated	Ecuador	Manabi	DOM-SAM	DOM-MI	0	0.9778	0	0	0.0222	0	1	54	DOM_MI_MEX_CNA
G27350A-COR	Domesticated	Ecuador	Azuay	DOM-SAM	DOM-MI	0	0.9559	0.0001	0.0033	0.0002	0.0405	1	57	DOM_MI_SOUTH_AMERICA
G25408-ELS	Domesticated	Colombia	Nariño	DOM-SAM	DOM-MI	0.0543	0.8301	0.0001	0.0001	0.1044	0.011	1	25	DOM_MI_SOUTH_AMERICA
G25703-ELS	Domesticated	Colombia	Nariño	DOM-SAM	DOM-MI	0.0155	0.9839	0.0003	0.0001	0.0001	0.0002	1.0001	73	DOM_MI_SOUTH_AMERICA
G25854-ELS	Domesticated	Colombia	Nariño	DOM-SAM	DOM-MI	0.007	0.9643	0.0001	0.0001	0.0205	0.0081	1.0001	25	DOM_MI_SOUTH_AMERICA
G25861-ELS	Domesticated	Colombia	Nariño	DOM-SAM	DOM-MI	0	0.9998	0	0	0.0001	0.0001	1	97	DOM_MI_SOUTH_AMERICA
G25894-ELS	Domesticated	Colombia	Nariño	DOM-SAM	DOM-MI	0.0187	0.9775	0	0	0.0036	0.0001	0.9999	73	DOM_MI_SOUTH_AMERICA
G26621-ELS	Domesticated	Colombia	Nariño	DOM-SAM	DOM-MI	0	0.9996	0	0	0.0004	0	1	78	DOM_MI_MEX_CNA
G25802-ELS	Domesticated	Colombia	Cauca	DOM-SAM	WILD-MI	0	0.2865	0	0	0.7134	0	0.9999	51	WILD_MI_SOUTHERN_WESTERN_MEXICO
G26509-ELS	Domesticated	Colombia	Cauca	DOM-SAM	DOM-MI	0	0.9999	0	0	0.0001	0	1	84	DOM_MI_SOUTH_AMERICA
G25207-ELS	Domesticated	Colombia	Valle Del Cauca	DOM-SAM	DOM-MI	0	0.9999	0	0	0.0001	0	1	84	DOM_MI_SOUTH_AMERICA
G26627-ELS	Domesticated	Colombia	Valle Del Cauca	DOM-SAM	DOM-MI	0	0.9999	0	0	0.0001	0	1	84	DOM_MI_SOUTH_AMERICA
G26718-ELS	Domesticated	Colombia	Valle Del Cauca	DOM-SAM	DOM-MI	0.0123	0.9665	0.0002	0.0001	0.0107	0.0102	1	15	DOM_MI_MEX_CNA
G26748-ELS	Domesticated	Colombia	Valle Del Cauca	DOM-SAM	DOM-MI	0.0041	0.9794	0.0001	0	0.0015	0.0149	1	73	DOM_MI_SOUTH_AMERICA
G26312-ELS	Domesticated	Colombia	Antioquia	DOM-SAM	DOM-MI	0	0.9999	0	0	0.0001	0	1	84	DOM_MI_SOUTH_AMERICA
G26647-ELS	Domesticated	Colombia	Antioquia	DOM-SAM	DOM-MI	0	0.9999	0	0	0.0001	0	1	84	DOM_MI_SOUTH_AMERICA
G26649-ELS	Domesticated	Colombia	Antioquia	DOM-SAM	DOM-MI	0	0.9999	0	0	0	0	0.9999	97	DOM_MI_SOUTH_AMERICA
G26702-ELS	Domesticated	Colombia	Caldas	DOM-SAM	DOM-MI	0	0.9999	0	0	0.0001	0	1	84	DOM_MI_SOUTH_AMERICA
G26705-ELS	Domesticated	Colombia	Caldas	DOM-SAM	DOM-MI	0	0.9999	0	0	0.0001	0	1	84	DOM_MI_SOUTH_AMERICA
G26706-COR	Domesticated	Colombia	Caldas	DOM-SAM	DOM-MI	0.001	0.9452	0.0001	0	0.0033	0.0504	1	73	DOM_MI_SOUTH_AMERICA
G26626-ELS	Domesticated	Colombia	Risaralda	DOM-SAM	DOM-MI	0	0.9958	0.0009	0.0002	0.0002	0.0029	1	57	DOM_MI_SOUTH_AMERICA
G26487-ELS	Domesticated	Colombia	Huila	DOM-SAM	DOM-MI	0	0.9998	0	0	0.0001	0	0.9999	84	DOM_MI_SOUTH_AMERICA
G26490-COR	Domesticated	Colombia	Huila	DOM-SAM	DOM-MI	0.0067	0.9763	0.0001	0	0.0002	0.0166	0.9999	15	DOM_MI_MEX_CNA
G25531-ELS	Domesticated	Colombia	Tolima	DOM-SAM	DOM-MI	0	0.9279	0.0001	0.0001	0.0003	0.0716	1	70	DOM_MI_SOUTH_AMERICA
G26498-ELS	Domesticated	Colombia	Tolima	DOM-SAM	DOM-MI	0	0.9998	0	0	0.0001	0.0001	1	84	DOM_MI_SOUTH_AMERICA
G27291-ELS	Domesticated	Colombia	Meta	DOM-SAM	DOM-MI	0	0.9999	0	0	0.0001	0	1	84	DOM_MI_SOUTH_AMERICA
G25514-ELS	Domesticated	Colombia	Cordoba	DOM-SAM	DOM-MI	0	0.9998	0	0	0.0001	0	0.9999	73	DOM_MI_SOUTH_AMERICA
G25815D-ELS	Domesticated	Colombia	Cordoba	DOM-SAM	DOM-MI	0	0.999	0	0	0.0009	0	0.9999	57	DOM_MI_SOUTH_AMERICA
G27429-ELS	Domesticated	Colombia	Cordoba	DOM-SAM	DOM-MI	0	0.9785	0.0002	0.0001	0.0071	0.0143	1.0002	70	DOM_MI_SOUTH_AMERICA
G25811-ELS	Domesticated	Colombia	Sucre	DOM-SAM	DOM-MI	0.0017	0.9979	0	0	0.0002	0	0.9998	15	DOM_MI_MEX_CNA
G27419-ELS	Domesticated	Colombia	Sucre	DOM-SAM	DOM-MI	0	0.9836	0.0001	0	0.001	0.0153	1	70	DOM_MI_SOUTH_AMERICA
G27455-ELS	Domesticated	Colombia	Sucre	DOM-SAM	DOM-MI	0	0.976	0	0	0.024	0	1	97	DOM_MI_SOUTH_AMERICA
G27462-ELS	Domesticated	Colombia	Sucre	DOM-SAM	DOM-MI	0	0.9516	0.0004	0	0.0228	0.0252	1	70	DOM_MI_SOUTH_AMERICA
G26315-ELS	Domesticated	Colombia	Atlantico	DOM-SAM	DOM-MI	0	0.9997	0	0	0.0003	0	1	78	DOM_MI_MEX_CNA
G27424-ELS	Domesticated	Colombia	Atlantico	DOM-SAM	DOM-MI	0	0.9999	0	0	0.0001	0	1	97	DOM_MI_SOUTH_AMERICA
G27445-COR	Domesticated	Colombia	Atlantico	DOM-SAM	DOM-MI	0	0.7985	0.0004	0.0054	0.0002	0.1954	0.9999	14	DOM_MI_SOUTH_AMERICA
G27454-ELS	Domesticated	Colombia	Atlantico	DOM-SAM	DOM-MI	0	0.8378	0.0002	0.0001	0.0003	0.1616	1	14	DOM_MI_SOUTH_AMERICA
G27435-ELS	Domesticated	Colombia	Atlantico	DOM-SAM	Admixed	0	0.4027	0.0001	0.0009	0.0001	0.5961	0.9999	30	DOM_MII
G27448-COR	Domesticated	Colombia	Bolivar	DOM-SAM	Admixed	0	0.4402	0.0031	0.0003	0.0002	0.5563	1.0001	0	DOM_NOT_ASSIGNED
G27423-ELS	Domesticated	Colombia	Bolivar	DOM-SAM	DOM-MI	0	0.9819	0.0001	0	0.018	0.0001	1.0001	70	DOM_MI_SOUTH_AMERICA
G26717-ELS	Domesticated	Colombia	Magdalena	DOM-SAM	DOM-MI	0	0.992	0.0001	0	0.0001	0.0077	0.9999	57	DOM_MI_SOUTH_AMERICA
G27422-COR	Domesticated	Colombia	Magdalena	DOM-SAM	DOM-MI	0	0.9699	0.0001	0	0.0002	0.0297	0.9999	15	DOM_MI_MEX_CNA
G27456-ELS	Domesticated	Colombia	Magdalena	DOM-SAM	DOM-MI	0	0.9906	0.0003	0	0.0002	0.0089	1	97	DOM_MI_SOUTH_AMERICA
G26529-ELS	Domesticated	Colombia	Guajira	DOM-SAM	DOM-MI	0	0.9995	0	0	0.0004	0	0.9999	57	DOM_MI_SOUTH_AMERICA
G25635A-ELS	Domesticated	United States		DOM-CNA	DOM-MI	0.2561	0.7436	0	0	0.0002	0	0.9999	0	DOM_NOT_ASSIGNED
G25215-ELS	Domesticated	United States	California	DOM-CNA	DOM-MI	0.0208	0.9784	0	0	0.0007	0	0.9999	93	DOM_MI_SOUTH_AMERICA
G25217-ELS	Domesticated	United States	Arizona	DOM-CNA	MI-Admixed	0	0.6492	0	0	0.3507	0	0.9999	0	DOM_NOT_ASSIGNED
G25656A-ELS	Domesticated	United States	Arizona	DOM-CNA	DOM-MI	0	0.9377	0.0003	0	0.0591	0.0029	1	95	DOM_MI_MEX_CNA
G25656-ELS	Domesticated	United States	Arizona	DOM-CNA	DOM-MI	0	0.8373	0	0	0.1626	0	0.9999	0	DOM_NOT_ASSIGNED
G25657A-ELS	Domesticated	United States	Arizona	DOM-CNA	DOM-MI	0.0064	0.7248	0	0	0.2688	0	1	36	DOM_MI_MEX_CNA
G25657B-ELS	Domesticated	United States	Arizona	DOM-CNA	DOM-MI	0.0204	0.7747	0	0	0.2049	0	1	36	DOM_MI_MEX_CNA
G25657-ELS	Domesticated	United States	Arizona	DOM-CNA	DOM-MI	0.0146	0.731	0	0	0.2543	0	0.9999	36	DOM_MI_MEX_CNA
G25664-ELS	Domesticated	United States		DOM-CNA	DOM-MI	0.014	0.9854	0	0	0.0005	0	0.9999	71	DOM_MI_SOUTH_AMERICA
G26007-ELS	Domesticated	United States	California	DOM-CNA	DOM-MI	0	0.9998	0	0	0.0002	0	1	93	DOM_MI_SOUTH_AMERICA
G26354-ELS	Domesticated	United States	California	DOM-CNA	DOM-MI	0.0334	0.9663	0	0	0.0002	0	0.9999	93	DOM_MI_SOUTH_AMERICA
G27532-ELS	Domesticated	United States	Iowa	DOM-CNA	DOM-MI	0.0155	0.9842	0	0	0.0002	0	0.9999	71	DOM_MI_SOUTH_AMERICA
G25587-ELS	Domesticated	United States	Florida	DOM-CNA	DOM-MI	0	0.9794	0.0001	0.0001	0.0001	0.0203	1	73	DOM_MI_SOUTH_AMERICA
G25592-ELS	Domesticated	United States	Maryland	DOM-CNA	DOM-MI	0.0003	0.9824	0.0003	0.0002	0.0003	0.0164	0.9999	57	DOM_MI_SOUTH_AMERICA
G25700A-ELS	Domesticated	Panama	Cocle	DOM-CNA	DOM-MI	0	0.9389	0	0	0.061	0	0.9999	87	DOM_MI_MEX_CNA
G25397-ELS	Domesticated	Costa Rica	Alajuela	DOM-CNA	DOM-MI	0	0.9382	0.0002	0	0.0008	0.0607	0.9999	0	DOM_NOT_ASSIGNED
G26438-ELS	Domesticated	Costa Rica	Cartago	DOM-CNA	DOM-MI	0	0.8883	0	0	0.1116	0	0.9999	95	DOM_MI_MEX_CNA
G25224A-ELS	Domesticated	Costa Rica	Guanacaste	DOM-CNA	DOM-MI	0	0.9381	0.0001	0.0001	0.0001	0.0615	0.9999	0	DOM_NOT_ASSIGNED
G26444-ELS	Domesticated	Honduras	Intibuca	DOM-CNA	DOM-MI	0	0.9378	0	0	0.0621	0	0.9999	87	DOM_MI_MEX_CNA
G27381-COR	Domesticated	Honduras	Intibuca	DOM-CNA	DOM-MI	0	0.8119	0.0004	0	0.044	0.1437	1	0	DOM_NOT_ASSIGNED
G25267-COR	Domesticated	El Salvador	San Salvador	DOM-CNA	DOM-MI	0	0.9324	0	0	0.0675	0	0.9999	87	DOM_MI_MEX_CNA
G25278-ELS	Domesticated	El Salvador	Cuscatlan	DOM-CNA	DOM-MI	0	0.9298	0	0	0.0701	0	0.9999	87	DOM_MI_MEX_CNA
G25364-ELS	Domesticated	El Salvador	La Libertad	DOM-CNA	DOM-MI	0	0.9996	0	0	0.0003	0	0.9999	78	DOM_MI_MEX_CNA
G25366-ELS	Domesticated	El Salvador	Santa Ana	DOM-CNA	DOM-MI	0	0.9998	0	0	0.0001	0	0.9999	95	DOM_MI_MEX_CNA
G25216-ELS	Domesticated	Guatemala	Alta Verapaz	DOM-CNA	DOM-MI	0	0.8412	0.0074	0	0.1512	0.0002	1	47	DOM_MI_MEX_CNA
G25254-ELS	Domesticated	Guatemala	Suchitepequez	DOM-CNA	DOM-MI	0	0.8544	0.0041	0	0.1413	0.0001	0.9999	47	DOM_MI_MEX_CNA
G25597-ELS	Domesticated	Guatemala	Santa Rosa	DOM-CNA	DOM-MI	0	0.9983	0	0	0.0016	0	0.9999	95	DOM_MI_MEX_CNA
G25974-ELS	Domesticated	Guatemala	Jalapa	DOM-CNA	DOM-MI	0	0.9649	0.0006	0	0.0316	0.0028	0.9999	95	DOM_MI_MEX_CNA
G26300-ELS	Domesticated	Guatemala	Chimaltenango	DOM-CNA	DOM-MI	0	0.8901	0	0	0.1099	0	1	95	DOM_MI_MEX_CNA
JMC_1104-COR	Domesticated	Guatemala	Petén	DOM-CNA	DOM-MI	0	0.9055	0.0157	0	0.0786	0.0001	0.9999	42	DOM_MI_MEX_CNA
JMC_1105-COR	Domesticated	Guatemala	Petén	DOM-CNA	DOM-MI	0	0.959	0	0	0.0409	0	0.9999	42	DOM_MI_MEX_CNA
JMC_1106-COR	Domesticated	Guatemala	Petén	DOM-CNA	DOM-MI	0	0.8948	0.0093	0	0.0958	0.0001	1	42	DOM_MI_MEX_CNA
G25971-ELS	Domesticated	Mexico	Morelos	DOM-CNA	MI-Admixed	0	0.6355	0	0	0.3644	0	0.9999	8	DOM_MI_MEX_CNA
G25614-ELS	Domesticated	Mexico	Oaxaca	DOM-CNA	DOM-MI	0	0.7327	0	0	0.2673	0	1	5	DOM_MI_MEX_CNA
G26542-ELS	Domesticated	Mexico	Puebla	DOM-CNA	MI-Admixed	0	0.65	0.0014	0	0.3484	0.0001	0.9999	5	DOM_MI_MEX_CNA
G27399-ELS	Domesticated	Mexico	Veracruz	DOM-CNA	DOM-MI	0	0.8014	0.0203	0	0.1743	0.0039	0.9999	47	DOM_MI_MEX_CNA
G25293-ELS	Domesticated	Mexico	Guerrero	DOM-CNA	MI-Admixed	0	0.6943	0	0	0.3056	0	0.9999	75	DOM_MI_MEX_CNA
G26291-ELS	Domesticated	Mexico	Guerrero	DOM-CNA	MI-Admixed	0	0.6781	0	0	0.3218	0	0.9999	75	DOM_MI_MEX_CNA
G26512-ELS	Domesticated	Mexico	Guerrero	DOM-CNA	DOM-MI	0	0.7038	0	0	0.2961	0	0.9999	75	DOM_MI_MEX_CNA
G26513-COR	Domesticated	Mexico	Guerrero	DOM-CNA	MI-Admixed	0	0.6866	0	0	0.3134	0	1	75	DOM_MI_MEX_CNA
G27388-ELS	Domesticated	Mexico	Guerrero	DOM-CNA	MI-Admixed	0	0.665	0.0001	0	0.3349	0	1	8	DOM_MI_MEX_CNA
G26534-ELS	Domesticated	Mexico	Chiapas	DOM-CNA	DOM-MI	0	0.8907	0	0	0.1092	0	0.9999	81	DOM_MI_MEX_CNA
JMC_1377-COR	Domesticated	Mexico	Chiapas	DOM-CNA	DOM-MI	0	0.8906	0	0	0.1093	0	0.9999	81	DOM_MI_MEX_CNA
JMC_1378_A-COR	Domesticated	Mexico	Chiapas	DOM-CNA	DOM-MI	0	0.8332	0.0212	0	0.1455	0.0001	1	72	DOM_MI_MEX_CNA
JMC_1381_A-COR	Domesticated	Mexico	Chiapas	DOM-CNA	DOM-MI	0	0.8388	0	0	0.1611	0	0.9999	72	DOM_MI_MEX_CNA
JMC_1382_B-COR	Domesticated	Mexico	Chiapas	DOM-CNA	DOM-MI	0	0.8463	0.0036	0	0.1497	0.0003	0.9999	72	DOM_MI_MEX_CNA
JMC_1386-COR	Domesticated	Mexico	Chiapas	DOM-CNA	DOM-MI	0	0.8374	0.0003	0.0001	0.162	0.0001	0.9999	72	DOM_MI_MEX_CNA
G25770-COR	Domesticated	Mexico	Campeche	DOM-CNA	WILD-MI	0	0.2876	0	0	0.7123	0	0.9999	51	WILD_MI_SOUTHERN_WESTERN_MEXICO
G25705-COR	Domesticated	Mexico	Campeche	DOM-YUC	DOM-MI	0	0.863	0.0052	0	0.1317	0	0.9999	72	DOM_MI_MEX_CNA
G25735-ELS	Domesticated	Mexico	Campeche	DOM-YUC	DOM-MI	0	0.9999	0	0	0	0	0.9999	101	DOM_MI_YUCATAN_PENINSULA
G25766-ELS	Domesticated	Mexico	Campeche	DOM-YUC	DOM-MI	0	0.9999	0	0	0	0	0.9999	80	DOM_MI_YUCATAN_PENINSULA
G25771-ELS	Domesticated	Mexico	Campeche	DOM-YUC	DOM-MI	0	0.9999	0	0	0	0	0.9999	101	DOM_MI_YUCATAN_PENINSULA
G25787-ELS	Domesticated	Mexico	Campeche	DOM-YUC	DOM-MI	0	0.9999	0	0	0	0	0.9999	101	DOM_MI_YUCATAN_PENINSULA
JMC_1024	Domesticated	Mexico	Campeche	DOM-YUC	DOM-MI	0	0.9999	0	0	0.0001	0	1	101	DOM_MI_YUCATAN_PENINSULA
JMC_1035	Domesticated	Mexico	Campeche	DOM-YUC	DOM-MI	0	0.9998	0	0	0.0001	0	0.9999	101	DOM_MI_YUCATAN_PENINSULA
JMC_1048-COR	Domesticated	Mexico	Campeche	DOM-YUC	DOM-MI	0	0.9997	0.0001	0	0.0001	0.0001	1	60	DOM_MI_YUCATAN_PENINSULA
JMC_1284-COR	Domesticated	Mexico	Campeche	DOM-YUC	DOM-MI	0	0.9999	0	0	0	0	0.9999	101	DOM_MI_YUCATAN_PENINSULA
BGS-4	Domesticated	Mexico	Campeche	DOM-YUC	DOM-MI	0	0.9999	0	0	0	0	0.9999	60	DOM_MI_YUCATAN_PENINSULA
G26173-ELS	Domesticated	Mexico	Yucatan	DOM-YUC	DOM-MI	0	0.9982	0.0004	0.0001	0.0002	0.0012	1.0001	93	DOM_MI_SOUTH_AMERICA
JMC_1003	Domesticated	Mexico	Yucatán	DOM-YUC	DOM-MI	0	0.9999	0	0	0	0	0.9999	80	DOM_MI_YUCATAN_PENINSULA
JMC_1005	Domesticated	Mexico	Yucatán	DOM-YUC	DOM-MI	0	0.9999	0	0	0.0001	0	1	60	DOM_MI_YUCATAN_PENINSULA
JMC_1007	Domesticated	Mexico	Yucatán	DOM-YUC	DOM-MI	0	0.9999	0	0	0	0	0.9999	80	DOM_MI_YUCATAN_PENINSULA
JMC_112	Domesticated	Mexico	Yucatán	DOM-YUC	DOM-MI	0	0.9999	0	0	0	0	0.9999	88	DOM_MI_YUCATAN_PENINSULA
JMC_1199	Domesticated	Mexico	Yucatán	DOM-YUC	DOM-MI	0	0.9999	0	0	0	0	0.9999	88	DOM_MI_YUCATAN_PENINSULA
JMC_1215	Domesticated	Mexico	Yucatán	DOM-YUC	DOM-MI	0	0.997	0.0007	0	0.0001	0.0021	0.9999	60	DOM_MI_YUCATAN_PENINSULA
JMC_1277-COR	Domesticated	Mexico	Yucatán	DOM-YUC	DOM-MI	0	0.9999	0	0	0	0	0.9999	88	DOM_MI_YUCATAN_PENINSULA
JMC_1288-COR	Domesticated	Mexico	Yucatán	DOM-YUC	DOM-MI	0	0.9999	0	0	0	0	0.9999	80	DOM_MI_YUCATAN_PENINSULA
JMC_1312-COR	Domesticated	Mexico	Yucatán	DOM-YUC	DOM-MI	0	0.9999	0	0	0	0	0.9999	101	DOM_MI_YUCATAN_PENINSULA
JMC_1325-COR	Domesticated	Mexico	Yucatán	DOM-YUC	DOM-MI	0	0.9999	0	0	0.0001	0	1	60	DOM_MI_YUCATAN_PENINSULA
JMC_277	Domesticated	Mexico	Yucatán	DOM-YUC	DOM-MI	0	0.9975	0.0015	0	0.0007	0.0002	0.9999	60	DOM_MI_YUCATAN_PENINSULA
JMC_995	Domesticated	Mexico	Yucatán	DOM-YUC	DOM-MI	0	0.9999	0	0	0	0	0.9999	60	DOM_MI_YUCATAN_PENINSULA
BGB-I	Domesticated	Mexico	Yucatán	DOM-YUC	DOM-MI	0	0.9999	0	0	0	0	0.9999	88	DOM_MI_YUCATAN_PENINSULA
BGP-4	Domesticated	Mexico	Yucatán	DOM-YUC	DOM-MI	0	0.9999	0	0	0	0	0.9999	101	DOM_MI_YUCATAN_PENINSULA
BGP-6	Domesticated	Mexico	Yucatán	DOM-YUC	DOM-MI	0	0.9999	0	0	0	0	0.9999	101	DOM_MI_YUCATAN_PENINSULA
BGP-7	Domesticated	Mexico	Yucatán	DOM-YUC	DOM-MI	0	0.9999	0	0	0	0	0.9999	101	DOM_MI_YUCATAN_PENINSULA
BGP-8	Domesticated	Mexico	Yucatán	DOM-YUC	DOM-MI	0	0.9999	0	0	0	0	0.9999	101	DOM_MI_YUCATAN_PENINSULA
BGP-9	Domesticated	Mexico	Yucatán	DOM-YUC	DOM-MI	0	0.9999	0	0	0	0	0.9999	101	DOM_MI_YUCATAN_PENINSULA
BGS-1	Domesticated	Mexico	Yucatán	DOM-YUC	DOM-MI	0	0.9999	0	0	0.0001	0	1	60	DOM_MI_YUCATAN_PENINSULA
BGS-2	Domesticated	Mexico	Yucatán	DOM-YUC	DOM-MI	0	0.9999	0	0	0.0001	0	1	60	DOM_MI_YUCATAN_PENINSULA
BGS-3	Domesticated	Mexico	Yucatán	DOM-YUC	DOM-MI	0	0.9999	0	0	0.0001	0	1	60	DOM_MI_YUCATAN_PENINSULA
BGS-6	Domesticated	Mexico	Yucatán	DOM-YUC	DOM-MI	0	0.9999	0	0	0.0001	0	1	60	DOM_MI_YUCATAN_PENINSULA
BGS-7	Domesticated	Mexico	Yucatán	DOM-YUC	DOM-MI	0	0.9999	0	0	0	0	0.9999	101	DOM_MI_YUCATAN_PENINSULA
BGS-8	Domesticated	Mexico	Yucatán	DOM-YUC	DOM-MI	0	0.9999	0	0	0.0001	0	1	101	DOM_MI_YUCATAN_PENINSULA
JMC_1059	Domesticated	Mexico	Quintana Roo	DOM-YUC	DOM-MI	0	0.9999	0	0	0	0	0.9999	101	DOM_MI_YUCATAN_PENINSULA
JMC_1061-COR	Domesticated	Mexico	Quintana Roo	DOM-YUC	DOM-MI	0	0.9999	0	0	0.0001	0	1	88	DOM_MI_YUCATAN_PENINSULA
JMC_111	Domesticated	Mexico	Quintana Roo	DOM-YUC	DOM-MI	0	0.9999	0	0	0	0	0.9999	101	DOM_MI_YUCATAN_PENINSULA
JMC_1179	Domesticated	Mexico	Quintana Roo	DOM-YUC	DOM-MI	0	0.9999	0	0	0	0	0.9999	101	DOM_MI_YUCATAN_PENINSULA
JMC_1186	Domesticated	Mexico	Quintana Roo	DOM-YUC	DOM-MI	0	0.9999	0	0	0	0	0.9999	101	DOM_MI_YUCATAN_PENINSULA
JMC_1196	Domesticated	Mexico	Quintana Roo	DOM-YUC	DOM-MI	0	0.9999	0	0	0	0	0.9999	101	DOM_MI_YUCATAN_PENINSULA
JMC_1197-COR	Domesticated	Mexico	Quintana Roo	DOM-YUC	DOM-MI	0	0.9999	0	0	0	0	0.9999	88	DOM_MI_YUCATAN_PENINSULA
JMC_1200	Domesticated	Mexico	Quintana Roo	DOM-YUC	DOM-MI	0	0.9999	0	0	0	0	0.9999	101	DOM_MI_YUCATAN_PENINSULA
JMC_1201	Domesticated	Mexico	Quintana Roo	DOM-YUC	DOM-MI	0	0.9999	0	0	0	0	0.9999	19	DOM_MI_YUCATAN_PENINSULA
JMC_1262-COR	Domesticated	Mexico	Quintana Roo	DOM-YUC	DOM-MI	0	0.9999	0	0	0.0001	0	1	88	DOM_MI_YUCATAN_PENINSULA
JMC_1265	Domesticated	Mexico	Quintana Roo	DOM-YUC	DOM-MI	0	0.9999	0	0	0.0001	0	1	19	DOM_MI_YUCATAN_PENINSULA
JMC_1335-COR	Domesticated	Mexico	Quintana Roo	DOM-YUC	DOM-MI	0	0.9999	0	0	0	0	0.9999	101	DOM_MI_YUCATAN_PENINSULA
JMC_13-COR	Domesticated	Mexico	Quintana Roo	DOM-YUC	DOM-MI	0	0.9999	0	0	0.0001	0	1	88	DOM_MI_YUCATAN_PENINSULA
JMC_9	Domesticated	Mexico	Quintana Roo	DOM-YUC	DOM-MI	0	0.9999	0	0	0	0	0.9999	101	DOM_MI_YUCATAN_PENINSULA
BGB-IV	Domesticated	Mexico	Quintana Roo	DOM-YUC	DOM-MI	0	0.9999	0	0	0	0	0.9999	88	DOM_MI_YUCATAN_PENINSULA
BGB-IX	Domesticated	Mexico	Quintana Roo	DOM-YUC	DOM-MI	0	0.9999	0	0	0	0	0.9999	88	DOM_MI_YUCATAN_PENINSULA
BGB-VII	Domesticated	Mexico	Quintana Roo	DOM-YUC	DOM-MI	0	0.9999	0	0	0	0	0.9999	88	DOM_MI_YUCATAN_PENINSULA
BGB-VI	Domesticated	Mexico	Quintana Roo	DOM-YUC	DOM-MI	0	0.9999	0	0	0	0	0.9999	88	DOM_MI_YUCATAN_PENINSULA
BGB-V	Domesticated	Mexico	Quintana Roo	DOM-YUC	DOM-MI	0	0.9999	0	0	0	0	0.9999	88	DOM_MI_YUCATAN_PENINSULA
BGP-5	Domesticated	Mexico	Quintana Roo	DOM-YUC	DOM-MI	0	0.9999	0	0	0	0	0.9999	101	DOM_MI_YUCATAN_PENINSULA
BGS-5	Domesticated	Mexico	Quintana Roo	DOM-YUC	DOM-MI	0	0.9999	0	0	0	0	0.9999	60	DOM_MI_YUCATAN_PENINSULA
BGS-9	Domesticated	Mexico	Quintana Roo	DOM-YUC	DOM-MI	0	0.9999	0	0	0	0	0.9999	101	DOM_MI_YUCATAN_PENINSULA
27Berni	Domesticated	Mexico		DOM-YUC	DOM-MI	0	0.9999	0	0	0.0001	0	1	19	DOM_MI_YUCATAN_PENINSULA
29inifap	Domesticated	Mexico		DOM-YUC	DOM-MI	0	0.9999	0	0	0.0001	0	1	19	DOM_MI_YUCATAN_PENINSULA
98inifap	Domesticated	Mexico		DOM-YUC	DOM-MI	0	0.9961	0.0001	0	0.0006	0.003	0.9998	60	DOM_MI_YUCATAN_PENINSULA
IPL190	Domesticated	Mexico		DOM-YUC	DOM-MI	0	0.9999	0	0	0	0	0.9999	88	DOM_MI_YUCATAN_PENINSULA
